# Supplementary material for: A longitudinal observational study of back pain incidence, risk factors and occupational physical activity in Swedish marine trainees
Source: PubMed Central journal article supplement — BMJ Open. 2019 May 14;9(5):e025150. doi: 10.1136/bmjopen-2018-025150 (PMC6530317; doi:10.1136/bmjopen-2018-025150), 2019-05-14
Supplement: bmjopen-2018-025150.draft_revisions.pdf [file bmjopen-2018-025150.draft_revisions.pdf]

# BMJ Open

BMJ Open is committed to open peer review. As part of this commitment we make the peer review history of every article we publish publicly available.

When an article is published we post the peer reviewers' comments and the authors' responses online. We also post the versions of the paper that were used during peer review. These are the versions that the peer review comments apply to.

The versions of the paper that follow are the versions that were submitted during the peer review process. They are not the versions of record or the final published versions. They should not be cited or distributed as the published version of this manuscript.

BMJ Open is an open access journal and the full, final, typeset and author-corrected version of record of the manuscript is available on our site with no access controls, subscription charges or pay-per-view fees (<http://bmjopen.bmj.com>).

If you have any questions on BMJ Open's open peer review process please email [info.bmjopen@bmj.com](mailto:info.bmjopen@bmj.com)

# BMJ Open

## Low back pain in the marine training course: A study of incidence, risk factors, and occupational physical activity

|                               |                                                                                                                                                                                                                                                                                                                                                                                                                                                                                                                                                                                                                                                                                                                      |
|-------------------------------|----------------------------------------------------------------------------------------------------------------------------------------------------------------------------------------------------------------------------------------------------------------------------------------------------------------------------------------------------------------------------------------------------------------------------------------------------------------------------------------------------------------------------------------------------------------------------------------------------------------------------------------------------------------------------------------------------------------------|
| Journal:                      | <i>BMJ Open</i>                                                                                                                                                                                                                                                                                                                                                                                                                                                                                                                                                                                                                                                                                                      |
| Manuscript ID                 | bmjopen-2018-025150                                                                                                                                                                                                                                                                                                                                                                                                                                                                                                                                                                                                                                                                                                  |
| Article Type:                 | Research                                                                                                                                                                                                                                                                                                                                                                                                                                                                                                                                                                                                                                                                                                             |
| Date Submitted by the Author: | 09-Jul-2018                                                                                                                                                                                                                                                                                                                                                                                                                                                                                                                                                                                                                                                                                                          |
| Complete List of Authors:     | <p>Monnier, Andreas; Karolinska Institutet, Department of Neurobiology, Care Sciences and Society; Swedish Armed Forces, Military Academy Karlberg</p> <p>Larsson, Helena; Karolinska Institutet, Department of Neurobiology, Care Sciences and Society; Swedish Armed Forces, Headquarters, Medical Services</p> <p>Nero, Håkan; Lund University, Department of Orthopedics, Faculty of Medicine</p> <p>Djupsjöbacka, Mats; University of Gävle, Department of Occupational and Public Health Sciences, Centre for Musculoskeletal Research</p> <p>Ång, Björn; Dalarna University, School of Education, Health and Social Studies; Karolinska Institutet, Department of Neurobiology, Care Sciences and Society</p> |
| Keywords:                     | Back pain < ORTHOPAEDIC & TRAUMA SURGERY, EPIDEMIOLOGY, OCCUPATIONAL & INDUSTRIAL MEDICINE, PREVENTIVE MEDICINE                                                                                                                                                                                                                                                                                                                                                                                                                                                                                                                                                                                                      |
|                               |                                                                                                                                                                                                                                                                                                                                                                                                                                                                                                                                                                                                                                                                                                                      |

SCHOLARONE™  
Manuscripts

# Low back pain in the marine training course: A study of incidence, risk factors, and occupational physical activity

Andreas Monnier<sup>1,2,3</sup>, Helena Larsson<sup>1,4</sup>, Håkan Nero<sup>5</sup>, Mats Djupsjöbacka<sup>6</sup>, and Björn O. Äng<sup>1,2,7\*</sup>

<sup>1</sup> Department of Neurobiology, Care Sciences and Society, Division of Physiotherapy, Karolinska Institutet, Huddinge, Sweden

<sup>2</sup> School of Education, Health and Social Studies, Dalarna University, Falun, Sweden

<sup>3</sup> Swedish Armed Forces, Military Academy Karlberg, Stockholm, Sweden

<sup>4</sup> Swedish Armed Forces, Headquarters, Medical Services, Stockholm, Sweden

<sup>5</sup> Department of Orthopedics, Faculty of Medicine, Lund University, Lund, Sweden

<sup>6</sup> Centre for Musculoskeletal Research, Department of Occupational and Public Health Sciences, University of Gävle, Gävle, Sweden

<sup>7</sup> Center for Clinical Research Dalarna, Falun, Sweden

\*Corresponding author

*Address for correspondence and reprint requests:*

Björn Äng

Högskolan i Dalarna

Högskolegatan 2

SE-791 88 Falun

E-mail: [bjang@du.se](mailto:bjang@du.se)

## Abstract

**Objectives:** To evaluate the occurrence of LBP and LBP that limits work ability, to identify their potential early risks and to quantify occupational physical activity in Swedish Armed Forces (SwAF) marines during their basic four-month marine training course.

**Design:** Prospective observational cohort study with weekly follow-ups.

**Participants:** Fifty-three SwAF marines entering the training course.

**Outcomes:** Incident of LBP and its related effect on work-ability, and associated early risks. Occupational physical activity, as monitored using accelerometers and self-reports.

**Results:** During the training course, 68% of the marines experienced at least one episode of LBP. This yielded a LBP and LBP limiting work ability incidence rate of 13.5 and 6.3 episodes per 1000 person-days, respectively. Previous back pain and shorter body height ( $\leq 1.80$ m) emerged as independent risks for LBP (HR 2.5, 95% CI 1.4–4.3; HR 2.0, 95% CI 1.2–3.3, respectively), as well as for LBP that limited work ability (HR 3.6, 95% CI 1.4–8.9; 4.5, 95% CI 2.0–10.0, respectively). Furthermore, managing fewer than four pull-ups emerged as a risk for LBP (HR 1.9, 95% CI 1.2–3.0), while physical training of fewer than three sessions per week emerged as a risk for LBP that limited work ability (HR 3.0, 95% CI 1.2–7.4). More than 80% of the work time measured was spent performing low levels of ambulation, however, combat equipment ( $\geq 17.5$  Kg) was carried for more than half of the work time.

**Conclusions:** Incidents of LBP are common in SwAF marines' early careers. The link between LBP and previous pain as well as low levels of exercise, highlights the need for preventive actions early on in a marine's career. The role of body height on LBP needs further investigation, including its relationship with body-worn equipment, before it can effectively contribute to LBP prevention.

## Strengths and limitations of this study

- The present unique prospective study design with weekly follow ups that is conducted early on in the marines' careers is believed to have a strong potential to fill knowledge gaps in LBP epidemiology in marine regiments and similar military units.
- The use of a repeated time-to-event regression method, with discontinued risk intervals, better reflects the recurrent nature of LBP, and makes more use of collected data than methods using single time-to-first events as an outcome.
- The definition of a new episode of LBP used in the present study does not distinguish between a new "uniquely" first event and a "symptom flare up" from a recurrent chain of events, which is a problem seen in most studies on back pain or other musculoskeletal pain problems.

- The results for the two physical “max” tests of pull-ups and kettle-bell lifts are limited to male marines only, as no female marines performed these tests.

**Keywords:** Back pain, longitudinal, military, musculoskeletal disorders, musculoskeletal injury, occupational exposure, physical test, prevention, work ability, work exposure.

For peer review only

## Background

Low back pain (LBP) is an epidemiological and clinical problem; it is the leading cause of disability worldwide (1). Its nature is commonly recurrent and causes reduction in physical activity (2) and work ability (3). Societal groups associated with high physical activity are indeed not spared musculoskeletal problems, and this includes highly trained military units. In fact, approximately 40% of Swedish Armed Forces (SwAF) marines on active duty experience LBP within a six-month period, and about half of these experience related limitations in work ability (4).

A high occurrence of musculoskeletal disorders is considered to be present by the SwAF occupational health personnel even during the four-month SwAF marine training course, where soldiers that have completed basic training are given their first marine-specific training. This physically demanding course focuses on marine-specific occupational tasks, including long range foot patrols with heavy equipment and assault operations from combat crafts (high-speed boats). Given the nature of this first and mandatory part of a marine's career, preventive measures at this stage could have a significant effect on the occurrence of future LBP in this group, and this has long been named a priority research topic in many military nations. Results gained from prospective studies in such communities, where occupational load and tasks are homogeneous and well known, have – we believe – great potential to fill knowledge gaps for further actions in defined military units.

Notably, medical examinations, health appraisals, and the evaluation of physical performance are basic routine procedures at the start of a military training course or before deployments. Information from such early examinations along with known risks from civilian contexts, such as a history of previous pain episodes (5, 6), physiological distress, or lifestyle factors (6, 7), has the potential to provide relevant risk information in operating activities. While low physical capacity and low performance on military physical fitness tests have previously been indicated as risks for LBP (8, 9), the screening of marines or similar elite units before entering the course with valid tests for their occupational exposures is not presently performed. New physical screening protocols have indeed been developed and introduced for other SwAF units, covering areas possibly related to the development of LBP in marines as well, for example lifting- and load-carrying capacities (10).

In addition, objective monitoring of occupational physical activity during the marine training course will aid in the interpretation of identified risks – such objective data has also been warranted for a long time. This study therefore aimed to prospectively evaluate the occurrence of LBP and its effect on work ability, as well as to identify potential early risks for such disorders in soldiers during the marine training course. Further aims were to quantify occupational physical activity and work-related exposure during the course.

## Methods

## Study design

This study used a prospective observational design with a cohort of SwAF marines entering the four-month marine training course. A screening program consisting of a self-administered questionnaire and a battery of physical tests was conducted at the start of the course, while pain occurrences were then followed up on a weekly basis. Occupational physical activity was continuously monitored with accelerometers worn during working hours for seven weeks of the course by a sub-cohort of participants; this was supplemented by platoon and individual logs of work tasks and physical training. All data collection was conducted at the 1st Marine Regiment, Stockholm, Sweden, between January and May, 2015. The study was approved in advance by the Regional Medical Research Ethics Committee, Stockholm (2014/1904-31/2). After receiving written and oral information on the study, signed informed consent was obtained from all participants prior to enrolment. Measurement occasions and the focus of the different phases of the course are illustrated in Figure 1, along with information on the participants' progression throughout the study.

*Figure 1. about here*

## Patient involvement

Given the defined target group in the present study, no patients seeking medical care were recruited. The present research questions and outcomes are based on data/conclusions from our ongoing translational research on active duty marines (4, 11); it is also influenced from our empirical knowledge and clinical work in this population. The Marines' medical and occupational health services have taken part in planning the data collection, and they constitute the primary way of implementing the results in clinical work for the studied population.

## Participants

To be eligible for inclusion in the present study, marines had to have the intention to complete the entire marine training course. Of 56 eligible marines, 53 met the criterion, and were enrolled in the study. The mean (SD) age, body weight, height, and body mass index for the enrolled marines were: 21.8 (3.4) years, 80.0 (10.1) kg, 1.82 (0.07) m and 24.1 (2.5) kg/m<sup>2</sup>, respectively. The majority of participants (91%, n=48) were men. Ten (19%) had experienced pain in the lower back within six months prior to baseline. Marines with ongoing LBP at baseline lasting for five or more consecutive weeks adjacent to the course start (n=1) were excluded from analysis based on incidences.

## Measurements and Procedure

### *Baseline questionnaires*

Participants initially completed confidential questionnaires to elicit military and demographic background information (4), general health (12) and mental health (13), self-assessed work ability (12), and physical training habits. The questions, which are described in detail in Table 1, have previously been used in international and Swedish public health cohorts and studies of active duty SwAF marines. The questionnaires also included detailed information on musculoskeletal pain for nine anatomical areas (14) within the past week and six months, with the following reporting options: For pain within the past week “No pain” or “Pain” and for pain within the past six months “No pain”, “Pain a couple a days per month or less”, or “Pain a couple of days per week or more”. Pain limiting work ability was assessed using the options “Not limited”, “Limited to some extent”, or “Limited to a large extent”.

*Table 1 about here*

### *Physical baseline tests*

Physical tests focusing on muscle strength and movement control were performed during the first ten days of the course. These tests, described in detail in Table 2, were selected on the basis of their use in clinical/preventive work among the studied population or in screening programs within the SwAF, and have previously been found reliable for use with active duty SwAF marines (19) or similar SwAF units (10). The strength tests, which were conducted following standardised SwAF instructions (10), were:

- *Kettlebell lifts* - The number of (correct) lifts of a pair of kettlebells (2 x 16, 24, or 32 kg) completed in a one-minute interval (10) and,
- *Pull-ups* - The number of (correct) pull-ups completed, performed hanging from a bar with an overhand (pronated) grip (10).

These tests were conducted within a series that also including a loaded lower limb functional test (20) (performed before these tests) and the ranger step test (21) (performed after these tests).

The two movement control tests were derived from the descriptions by Comerford and Mottram (22) and tested for good reliability in SwAFM (19). These tests focus on the ability to actively control or prevent compensatory movement in the lumbar spine, i.e. flexion, extension or rotation, while actively moving the lower extremities. The tests, conducted following standardised instructions, (19) were:

- *Double Leg Lift & Lower (DLL&L)*: The subject, from a supine position, lifts both feet off the bench to a 90° hip flexion, and then lowers them back to the bench. Any uncontrolled movements in flexion or extension were recorded in the test protocol.
- *Double Leg Lift & Alternate Leg Extension (DLL&ALE)*: The subject, from a supine position, lifts both feet off the bench to a 90° hip flexion, then lowers and straightens one leg to a fully extended position and then back to a 90° hip flexion. The procedure was then repeated with the other leg, after which both legs were lowered to the starting position. The direction of any uncontrolled movements in extension, flexion, or rotation was recorded in the test protocol.



Table 2. about here

### *Continuous assessment of work-related physical activity and occupational tasks*

Twenty-seven marines from the inception cohort were randomly assigned by a computer-generated algorithm to wear accelerometers during the course. Six declined, leaving 21 marines in this sub-cohort. They were fitted with tri-axial accelerometers (GT3X+BT, Actigraph, Pensacola, FL) and instructed to wear them on the left hip during all working hours of the course, with the exception of planned prolonged loaded marches (due to the risk of interaction with back pack hip belts resulting in abrasions or compression injuries), aquatic physical training, or during training conducted at the marine combat obstacle course (due to water obstacles). They were also instructed to remove them during field exercises conducted at other bases during weeks 11-13 of the course due to an inability to collect data at these locations. The accelerometers were initialised using ActiLife software (version 5.5), with data sampling set at a rate of 30Hz. Information on occupational tasks and equipment worn, and physical training sessions conducted, was recovered from detailed weekly schedules completed by the instructing officers, as well as from the self-reported diaries kept by the marines.

### *Weekly follow-up*

Incidence of musculoskeletal disorders and related effect on work ability were self-reported weekly during the course, using a short version of the baseline questionnaire. The number of responders for each week is illustrated in Figure 1. Weekly follow-ups were not strictly possible due to the geographic location of training during course week 12, so the follow up was conducted at the beginning of week 13 and reported as week 12.5 (i.e. week 12 and half of week 13).

## **Outcomes**

LBP was defined as the occurrence of any self-rated pain in the lower back (from the twelfth ribs to the lower gluteal folds (23) within the preceding week, as reported during the weekly follow-up. LBP limiting work ability was defined as the occurrence of any self-rated pain in the lower back within the preceding week that had limited work ability.

For incidence proportions, rates, and regression analysis (described in detail below), marines were considered to be at risk for an event as long as they were under observation, and until the occurrence of a LBP event. At the time of pain occurrence, the risk interval was discontinued and marines were not considered to be at risk for a new episode until they were pain free for the next coming week (if reporting no pain in that week, it was counted, if reporting pain also that week, the week remained censored). Meeting this requirement automatically allowed them to re-enter the analysis (pain observation period). Marines with ongoing LBP at baseline were not considered at risk until they were pain free for at least one

1  
2  
3 week, at which point in time they entered the analysis. Late entry was only allowed during the  
4 first four weeks to accurately reflect the independent variables collected at baseline.  
5  
6  
7

## 8 **Independent variables**

9  
10 Independent variables analysed as potential risk factors for LBP and LBP limiting work  
11 ability were selected based on existing evidence from active-duty SwAF marines, other  
12 military and civilian populations, and empirical knowledge from clinical work with the SwAF  
13 marines. These 17 variables, including two physical characteristics, four health-related, two  
14 work-related, three on physical training habits, and the results of the two strength and the two  
15 movement control tests (in flexion and extension), are described in detail in Table 1 and 2.  
16  
17

## 18 **Confounding variables**

19  
20 *Age, BMI, sex, smoking, non-musculoskeletal co-morbidity, and LBP previously during the*  
21 *course* were a priori considered possible confounders. A confounder was defined as a variable  
22 that, when included during the analytic process, changed the hazard ratio of the crude  
23 regression model >20% (24).  
24  
25  
26  
27  
28

## 29 **Data management and statistics**

### 30 **Missing data**

31  
32 The dependent variables, i.e. LBP and LBP limiting work ability, were missing for 11% of the  
33 data due to subjects' lost to follow-up during the course. Also, of the independent variables,  
34 the kettle bells lift tests were missing for 30%, the pull-ups 23%, and the DLL-ALE test 4%,  
35 due to participants not being able (or allowed) to perform the test at baseline (illness such as  
36 having a cold or other infection in 44% of these and pain or similar co-morbidity in 56%). All  
37 female marines (n=5) missed the kettlebells lift and the pull-ups tests due to illness or ongoing  
38 pain. Analysis of the missing data mechanism (25) indicated, however, that data were missing  
39 completely at random for both outcome and predictor variables. Multiple imputations by  
40 Markov chain Monte Carlo, with random draws based on Jeffreys prior distribution, were  
41 used to generate 50 imputed datasets with completed data on all predictor variables, on which  
42 the pooled analyses were based (26). Given that no female marines performed the two  
43 strength tests, imputing values for females based on data from only male marines on these  
44 tests might affect the accuracy of the imputation. Therefore, regressions including these two  
45 tests were repeated, as part of the sensitivity analysis, on only complete cases, as well as on  
46 multiple imputed data with females excluded.  
47  
48  
49  
50  
51

### 52 **Descriptive statistics**

#### 53 *LBP and LBP limiting work-ability*

54  
55 Weekly prevalence was analysed as a percentage of those under observation, with 95% CI  
56 (27). Weekly incidence of LBP and LBP limiting work ability was analysed as a percentage  
57  
58  
59  
60

of those at risk, with a 95% CI (27). The incidence rate of LBP and LBP limiting work ability during the course was calculated based on the number of episodes and the time at risk, presented as episodes per 1000 person-days, with a corresponding 95% CI (28).

#### *Work-related physical activity and occupational tasks*

Accelerometer data were analysed only if sufficient wear time could be established, which was defined as at least 180 minutes of wear time per day (for full work days) on at least three workdays (for a five-day week). Non-wear time within days was identified by algorithms suggested by Choi (29). For valid wear-time, vertical counts per minute (cpm; where the arbitrary unit of counts is the filtered raw acceleration generated by body movements and captured by the accelerometer) - based on 10-second epochs - were extracted and reported as minutes and percentage of total work time, and work time per week spent in these predefined categories: 0-99; 100-2019; 2020-5998; and 5999- cpm (30). Here, the category of 2020-5998 cpm was considered to be comparable to slow to brisk walking (~3.8-7.5 km/h) (31, 32). In addition, the percentage of the workday spent in these categories was reported for time with and without load carriage (combat equipment,  $\geq 17.5$  Kg), as identified from the detailed schedules (verified against activity logs). Evaluation and comparison with work schedules were performed visually.

#### Regression analysis

We used the Andersen-Gill repeated time-to-event regression method (33, 34) with the robust sandwich variance estimator (35), and discontinuous risk intervals (34), as defined above, to examine the predictive association between the independent variables and LBP. The results are reported as hazard ratios (HR) with a corresponding 95% CI. Secondly, this method was applied to examine the predictive association between independent variables and LBP limiting work ability.

Independent variables were analysed in two blocks. First, *physical characteristics, work- and health-related* variables, as identified with univariate time-to-event regressions to be associated with the dependent variable, at the level of  $p < 0.25$ , were included in a multivariable time-to-event regression model. This was followed by an iterative, purposeful selection process of deleting non-significant variables at  $p > 0.05$ . The model was then refitted and verified until a final model contained only significant ( $p < 0.05$ ) independent variables, identified confounders, and significant ( $p < 0.05$ ) interactions (between independent variables in the final model and/or independent variables and confounders) (24). This process was repeated for the *clinical tests*, with the addition of the significant *physical characteristics, work- and health-related* risk factors addressed as additional potential confounders. All final models were deemed to have sufficient power, based on the events-per-variable ratio (36), and showed no violations of underlying assumptions of proportional hazards. Analysis was performed using STATA Statistical software (version 13.1; College Station, TX).

## Results

1  
2  
3 Table 3 presents demographic and background data as well as self-rated general health for the  
4 53 marines who completed the baseline questionnaire (96% response rate). Good or excellent  
5 current health status was reported by >95% of respondents. Of the 53 marines starting the  
6 course, 49% joined directly from basic military training, while the other 51% came from  
7 previous service in the SwAF or from a period of civilian occupation/studies.  
8  
9

### 10 11 12 **LBP and LBP limiting work-ability**

13 Figures 2 and 3 present the prevalence and incidence of LBP and LBP limiting work ability,  
14 expressed per week during the marine training course. A total of 68% of the marines  
15 experienced at least one episode of LBP during the course, of whom 57% reported related  
16 limitations in their ability to work. The average LBP episode consisted of 1.6 weeks of  
17 reported pain, with 42% of the sufferers experiencing at least one recurrent episode (with an  
18 average of 2.8 weeks without reporting pain between episodes). This gave an LBP incidence  
19 rate of 13.5 (95% CI 10.4 to 17.8) episodes per 1000 person-days. For LBP limiting work  
20 ability the corresponding incidence rate was 6.3 (95% CI 4.2 to 10.0). For comparison,  
21 incidence rates based on time to first event (during the course) are presented in supplementary  
22 Table 1.  
23  
24

25  
26 *Fig. 2 and 3 about here.*  
27

### 28 **Risk factors for LBP and LBP limiting work ability**

#### 29 ***Individual physical characteristics, work- and health-related risk factors***

30 Tables 4 and 5 present the results from univariate, final unadjusted and final adjusted  
31 multivariable recurrent-event regression models for LBP and LBP limiting work ability  
32 during the course. *Back pain (lumbar and/or thoracic back pain)* within six months prior to  
33 the MTC and *shorter body height ( $\leq 1.80m$ )*, adjusted for the confounding effect of *sex* (LBP  
34 and LBP limiting work ability) and *previous neck shoulder pain* (LBP limiting work ability),  
35 were identified as independent risks. Additionally, *less than three sessions per week of*  
36 *physical training* was a significant risk for LBP that limited work ability. No interactions  
37 between the independent variables, nor with the confounders, emerged as significant in any of  
38 the models.  
39  
40  
41

42  
43 *Tables 4 and 5 about here.*  
44

#### 45 ***Clinical tests***

46 Performing fewer than four pull-ups (HR 1.9, 95% CI 1.2–3.0), adjusted for confounding  
47 effect of *previous BP* and *body height*, was identified as a significant risk for LBP. However,  
48 no clinical tests were associated with LBP limiting work ability at  $p < 0.05$ . Final unadjusted  
49 and adjusted models for LBP limiting work ability are presented in Supplementary Tables 2  
50 and 3. Sensitivity analysis based on complete cases and imputed data, with only males, caused  
51 only marginal changes in the results, with no effect on inference.  
52  
53

#### 54 **Work-related physical activity and occupational tasks**

55  
56  
57  
58  
59  
60

1  
2  
3 Of the seven weeks of measurement, five contained sufficient wear time that could be fully  
4 used for analyses. During these weeks, an average of 16% of the working time (73 minutes  
5 per day) (not including long-distance march training, combat obstacle course or aquatic  
6 training, with a weekly average of additionally 2 hrs), was spent in physical activity of at least  
7 moderate intensity, i.e. 2020-5998 cpm, or slow-to-brisk walking (~3.8-7.5 km/h). On  
8 average, four percent of total working time was spent in physical activity of at least vigorous  
9 intensity, i.e. >5998 cpm. Sixty-one percent (44 min. per day) of the time spent in activities  
10 generating >2020 cpm was conducted wearing combat equipment ( $\geq 17.5$  kg), as illustrated in  
11 Figure 4. There was, however, a large variation across weeks in work-time wearing combat  
12 equipment that spanned from 4% to 94%, as exemplified in Figure 5.  
13  
14  
15

## 16 Discussion

17  
18 This prospective cohort study among Swedish marines showed a high occurrence of LBP and  
19 consequent limitations in work ability while participating in their basic training marine-  
20 course. Marines with a history of previous back pain, shorter body height, or poor  
21 performance in the pull-up test were twice as likely to experience a new episode of LBP  
22 during this four-month period of physically demanding marine tasks.  
23  
24  
25

26 This study followed 95% (n=53) of the participants enrolled in a typical marine training  
27 course in the Swedish Armed Forces (SwAF). Our cohort was homogeneous with regard to  
28 demographic characteristics and occupational tasks, which is similar to previous studies of  
29 marines (4), and may be regarded as a representative military-marine sample.  
30  
31  
32

33 We believe this study to be the first to use a repeated time-to-event regression method, with  
34 discontinued risk intervals, for LBP in a military population. This method may – we believe –  
35 better reflect the recurrent nature of LBP and make more use of the collected data than the  
36 conversional methods using time-to-first event. The definitions of a new event vary between  
37 studies (37), but a pain-free period of one week was considered sufficient for an additional  
38 event to be defined as either a new event or symptom “flare up” (38) from a previous event.  
39 Regarding our baseline testing, marines that were injured (n=9) or ill (n=7) were not allowed  
40 to perform the “max effort” tests, because of the risk of worsening their health. However,  
41 analysis based on complete cases, as well as on imputations including only males, did not  
42 change the results, indicating an appropriate inference from the present results. Due to none of  
43 the female marines conducting the two “max” tests of pull-ups or kettle-bell lifts, these results  
44 should only be extended to males.  
45  
46  
47  
48

49 Our results show a relatively high incidence of LBP in this cohort of young marines, with  
50 more than two thirds experiencing at least one LBP episode during the course. This is almost  
51 twice the reported six-month LBP prevalence for active duty SwAF marines (4), more than  
52 twice the LBP incidence in the British combat infantryman’s course (39), and higher than the  
53 total musculoskeletal injury incidence in other military training cohorts (40-42). This  
54 difference in pain occurrence may partly be explained by differences in the length of follow-  
55 up periods (43), or how LBP was defined (44). However, the recall period in this study was  
56  
57  
58  
59

1  
2  
3 relatively short, and as such should limit the risk of recall bias. Given that three of five  
4 marines experiencing LBP also reported related limitations in work ability, it is likely that  
5 LBP reduced the intended goals with the course, and this may have future negative effects on  
6 the operational readiness of SwAF marine units.  
7

8  
9  
10 Although previous musculoskeletal disorders are considered to be the strongest predictor for  
11 new musculoskeletal disorders in military populations (11, 41, 45, 46), it is not clear if such  
12 previous pain-episodes are anatomically region-specific in their prediction. This might not  
13 make a substantial difference in general primary prevention policy decisions, but the present  
14 findings could – we believe – help clinicians to be more specific in their selection of suitable  
15 secondary preventive measures for LBP. However, until the pathophysiological pathways  
16 between prior and future pain episodes are further disentangled, this does not inform the  
17 clinician what specific deficiencies to address. As such, the current use is limited to  
18 identifying persons at risk of LBP (47); marines at risk should be considered for further  
19 clinical examination and secondary preventive action. The same goes for marines with a body  
20 height of  $\leq 1.80$ m, here identified as a risk for both LBP and LBP limiting work ability. While  
21 risks associated with body height are in line with our previous results (4), it is not likely that a  
22 short body height per se constitutes the actual risk, it could potentially represent an interaction  
23 with equipment worn or specific work tasks conducted.  
24  
25  
26  
27

28  
29 The present results also highlight the need for regular physical training ( $\geq 3$  sessions/week)  
30 for military personnel planning to attend the marine training course. This is in line with  
31 recommendations for general health in the civilian population (48), and should certainly be  
32 stressed for this physically active military community as well. Here, inferior upper-body  
33 strength, as tested by the pull-up test, seems to have played a role in back pain aetiology. This  
34 test, used in different forms in many military physical assessments (10, 49), is considered a  
35 relevant test of the ability to navigate over obstacles (10), but also as a proxy for general  
36 upper-body strength and muscle endurance (50). The test primarily challenges the back,  
37 shoulder and arm muscles, but also to a moderate extent the external oblique and erector  
38 spinae muscles (51). As such, it could represent a valid test for marines as upper body  
39 strength is crucial for load carriage (52). No female marines conducted these tests, therefore  
40 future cut-offs need to be validated for them. Neither the kettlebell lifts nor any of the  
41 movement-control tests predicted future LBP, however, “core-strengthening exercises” were  
42 already conducted as part of the marines’ daily calisthenics in this sample, potentially  
43 preventing such deficits early in the course. Still, the results tally with our previously reported  
44 results from active duty marines, where these tests, analysed as overall pass/fail, failed to  
45 predict back pain within a six- and 12-month event window (11).  
46  
47  
48  
49

50  
51 While the physical demands of the course could be one reason for high LBP incidence, more  
52 than eighty percent of the work time measured was spent at low levels of ambulation, i.e.  
53 producing less than 2020 cpm. These results were similar to, or lower than, ambulatory  
54 movements reported for basic military training courses (53-55). However, in comparison with  
55 the US basic military training, where loads of no more than 4.5 kg were carried for 80% of the  
56  
57  
58  
59

1  
2  
3 time (53), the marines in the present study carried combat equipment weighing >17.5 kg for  
4 more than half of the measured work time. In addition, the maximum weight of equipment  
5 worn on certain occasions, such as during loaded marches, can at times be more than twice  
6 that. Considering that both body-worn equipment and load carriage has been linked to LBP in  
7 deployed military personnel (8), this may possibly relate to the high LBP incidence in the  
8 present study. Furthermore, it highlights the need to consider load carriage when examining  
9 the association between ambulatory movement and LBP in the military context.  
10  
11  
12  
13

14 In summary, LBP and related limitations in work ability are common during the four-month  
15 physically demanding marine training course, and may affect the future operational readiness  
16 of marine units. Since previous LBP episodes are the most consistent risk for further LBP,  
17 marines entering the course with a history of LBP should receive tailor-made secondary  
18 preventive actions. Furthermore, marines with few weekly sessions of physical training, or  
19 with insufficient upper body strength, should be considered for targeted physical training.  
20 Further investigation on the role of body height on LBP is needed, including its relation to  
21 body-worn equipment, before it can be effectively used in LBP prevention. In addition, while  
22 ambulation was low for parts of the course, combat equipment was carried for more than half  
23 of the work time, further indicating the need to consider the role of body-worn equipment in  
24 LBP aetiology for this population.  
25  
26  
27  
28  
29  
30  
31  
32

## 33 **Acknowledgements**

34  
35 Funding from the Swedish Armed Forces PhD program and financial support from the  
36 Swedish Society for Military Medical Officers, Ann-Marie och Ragnar Hemborgs  
37 Minnesfond and Land-och Sjöfonden is gratefully acknowledged. In addition, we would like  
38 to thank the 1st Marine Regiment of the Swedish Armed Forces for overall support. The  
39 authors would also like to thank Jacob Sejersen and Kjell Norman for valuable support during  
40 design of the study and during data collection.  
41  
42  
43

## 44 **Contributorship statement**

45  
46 AM was the main writer of the paper and participated in the conception and design of the  
47 study, and acquired, analysed and interpreted the data. HL and HN participated in the  
48 conception and design of the study, planning of the analysis, interpretation of the data as well  
49 as the writing and revising of the paper. MD was involved in the design and planning of the  
50 study, as well as interpreting the data and revising the paper. As senior project researcher,  
51 BOÅ participated in the conception and design of the study, planning the analysis and  
52 interpretation of the data, and writing and revising the paper. All the authors have read and  
53 approved the final manuscript.  
54  
55  
56  
57  
58  
59  
60

## Competing interests

Dr. Monnier reports grants from The Swedish Society for Military Medical Officers, grants from Ann-Mari och Ragnar Hemborgs Minnesfond, grants from Stiftelsen fond till minne av ömsesidiga Olycksfallsförsäkringsbolaget Land och Sjö, during the conduct of the study; Dr. Larsson has nothing to disclose. Dr. Nero has nothing to disclose. Dr. Djupsjöbacka has nothing to disclose. Dr. Äng has nothing to disclose.

## Funding

Funding was received from the Swedish Armed Forces PhD program, the Swedish Society for Military Medical Officers, Ann-Marie och Ragnar Hemborgs Minnesfond and Land-och Sjöfonden. The funding organisations had no authority over or input into any part of the study.

## Data sharing statement

No additional data are available.



## References

1. Global, regional, and national incidence, prevalence, and years lived with disability for 301 acute and chronic diseases and injuries in 188 countries, 1990-2013: a systematic analysis for the Global Burden of Disease Study 2013. *Lancet*. 2015;386(9995):743-800.
2. Hoy D, Bain C, Williams G, March L, Brooks P, Blyth F, et al. A systematic review of the global prevalence of low back pain. *Arthritis Rheum*. 2012;64(6):2028-37.
3. Katz JN. Lumbar disc disorders and low-back pain: socioeconomic factors and consequences. *J Bone Joint Surg Am*. 2006;88(suppl 2):21-4.
4. Monnier A, Larsson H, Djupsjöbacka M, Brodin L-Å, Ång BO. Musculoskeletal pain and limitations in work ability in Swedish marines: a cross-sectional survey of prevalence and associated factors. *BMJ Open*. 2015;5(10):e007943.
5. Papageorgiou AC, Croft PR, Thomas E, Ferry S, Jayson M, Silman AJ. Influence of previous pain experience on the episode incidence of low back pain: results from the South Manchester Back Pain Study. *Pain*. 1996;66(2):181-5.
6. Adams MA, Mannion AF, Dolan P. Personal risk factors for first-time low back pain. *Spine*. 1999;24(23):2497.
7. Feyer A-M, Herbison P, Williamson AM, de Silva I, Mandryk J, Hendrie L, et al. The role of physical and psychological factors in occupational low back pain: a prospective cohort study. *Occup Environ Med*. 2000;57(2):116-20.
8. Roy TC, Lopez HP, Piva SR. Loads worn by soldiers predict episodes of low back pain during deployment to Afghanistan. *Spine*. 2013;38(15):1310-7.
9. Taanila H. Musculoskeletal disorders in male Finnish conscripts: Importance of physical fitness as a risk factor, and effectiveness of neuromuscular exercise and counseling in the prevention of acute injuries, and low back pain and disability. (Doctoral dissertation, University of Tampere, School of Medicine, UKK Institute, Centre for Military Medicine Finland, 2013). Retrieved from <http://urn.fi/URN:ISBN:978-951-44-9069-9>
10. Larsson H, Tegern M, Monnier A, Skoglund J, Helander C, Persson E, et al. Content Validity Index and Intra- and Inter-Rater Reliability of a New Muscle Strength/Endurance Test Battery for Swedish Soldiers. *PloS one*. 2015;10(7):e0132185.
11. Monnier A, Djupsjöbacka M, Larsson H, Norman K, Ång BO. Risk factors for back pain in marines; a prospective cohort study. *BMC Musculoskelet Disord*. 2016;17(1):319.
12. Ilmarinen J. The work ability index (WAI). *Occup Med*. 2007;57(2):160-.
13. Goldberg DP, Gater R, Sartorius N, Ustun T, Piccinelli M, Gureje O, et al. The validity of two versions of the GHQ in the WHO study of mental illness in general health care. *Psychol Med*. 1997;27(01):191-7.
14. Kuorinka I, Jonsson B, Kilbom A, Vinterberg H, Biering-Sørensen F, Andersson G, et al. Standardised Nordic questionnaires for the analysis of musculoskeletal symptoms. *Appl Ergon*. 1987;18(3):233-7.
15. DP Goldberg, P Williams. A User's Guide to the General Health Questionnaire. 3ed, 1988. NFER, London, UK.
16. Makowska Z, Merez D, Moscicka A, Kolasa W. The validity of general health questionnaires, GHQ-12 and GHQ-28, in mental health studies of working people. *Int J Occup Med Environ Health*. 2002;15(4):353-62.
17. Fredriksson K, Alfredsson L, Ahlberg G, Josephson M, Kilbom Å, Wigaeus Hjelm E, et al. Work environment and neck and shoulder pain: the influence of exposure time. Results from a population based case-control study. *Occup Environ Med*. 2002;59(3):182-8.

18. Vingård E, Alfredsson L, Hagberg M, Kilbom Å, Theorell T, Waldenström M, et al. To What Extent Do Current and Past Physical and Psychosocial Occupational Factors Explain Care-Seeking for Low Back Pain in a Working Population?: Results from the Musculoskeletal Intervention Center-Norrköping Study. *Spine*. 2000;25(4):493-500.
19. Monnier A, Heuer J, Norman K, Ång BO. Inter-and intra-observer reliability of clinical movement-control tests for marines. *BMC Musculoskelet Disord*. 2012;13(1):263.
20. Larsson H, Larsson M, sterberg H, Harms-Ringdahl K. Screening Tests Detect Knee Pain and Predict Discharge from Military Service. *Mil Med*. 2008;173(3):259-65.
21. Larsson H, Harms-Ringdahl K. A lower-limb functional capacity test for enlistment into Swedish Armed Forces ranger units. *Mil Med*. 2006;171(11):1065-70.
22. Comerford MJ. The Performance Matrix performance Profiling, risk assessment & training strategies for injury prevention & performance enhancement. UK: KC International / Movement Performance Solutions; 2008.
23. Hoy D, March L, Brooks P, Woolf A, Blyth F, Vos T, et al. Measuring the global burden of low back pain. *Best Pract Res Clin Rheumatol*. 2010;24(2):155-65.
24. Hosmer DW, Lemeshow S. May S. *Applied Survival Analysis: Regression Modelling of Time to Event Data*. 2nd ed., 2008. Hoboken: John Wiley & Sons.
25. Vittinghoff E, Glidden D, Shiboski S, McCulloch C. *Regression methods in biostatistics: linear, logistic, survival, and repeated measures models*. 2005. New York: Springer.
26. Rubin DB. Multiple imputation after 18+ years. *J Am Stat Assoc*. 1996;91(434):473-89.
27. Brown LD, Cai TT, DasGupta A. Interval estimation for a binomial proportion. *Statist Sci*. 2001:101-17.
28. Miller RG. The jackknife-a review. *Biometrika*. 1974;61(1):1-15.
29. Choi L, Liu Z, Matthews CE, Buchowski MS. Validation of accelerometer wear and nonwear time classification algorithm. *Med Sci Sports Exerc*. 2011;43(2):357.
30. Troiano RP, Berrigan D, Dodd KW, Masse LC, Tilert T, McDowell M. Physical activity in the United States measured by accelerometer. *Med Sci Sports Exerc*. 2008;40(1):181.
31. Nichols JF, Morgan CG, Chabot LE, Sallis JF, Calfas KJ. Assessment of physical activity with the Computer Science and Applications, Inc., accelerometer: laboratory versus field validation. *Res Q Exerc Sport*. 2000;71(1):36-43.
32. Matthews CE. Calibration of accelerometer output for adults. *Med Sci Sports Exerc*. 2005;37(11 Suppl):S512-22.
33. Andersen PK, Gill RD. Cox's regression model for counting processes: a large sample study. *Ann Stat*. 1982:1100-20.
34. Guo Z, Gill TM, Allore HG. Modeling repeated time-to-event health conditions with discontinuous risk intervals: an example of a longitudinal study of functional disability among older persons. *Methods Inf Med*. 2008;47(2):107.
35. Lin DY, Wei L-J. The robust inference for the Cox proportional hazards model. *J Am Stat Assoc*. 1989;84(408):1074-8.
36. Vittinghoff E, McCulloch CE. Relaxing the rule of ten events per variable in logistic and Cox regression. *Am J Epidemiol*. 2007;165(6):710-8.
37. Stanton TR, Latimer J, Maher CG, Hancock MJ. How do we define the condition 'recurrent low back pain'? A systematic review. *Eur Spine J*. 2010;19(4):533-9.
38. Young AE, Wasiak R, Phillips L, Gross DP. Workers' perspectives on low back pain recurrence: "It comes and goes and comes and goes, but it's always there". *PAIN*. 2011;152(1):204-11.

- 1  
2  
3 39. Sharma J, Greeves JP, Byers M, Bennett AN, Spears IR. Musculoskeletal  
4 injuries in British Army recruits: a prospective study of diagnosis-specific incidence and  
5 rehabilitation times. *BMC Musculoskelet Disord*. 2015;16(1):1.
- 6 40. Taanila H, Suni JH, Kannus P, Pihlajamäki H, Ruohola J-P, Viskari J, et al. Risk  
7 factors of acute and overuse musculoskeletal injuries among young conscripts: a population-  
8 based cohort study. *BMC Musculoskelet Disord*. 2015;16(1):1.
- 9 41. Knapik JJ, Graham B, Cobbs J, Thompson D, Steelman R, Jones BH. A  
10 prospective investigation of injury incidence and injury risk factors among Army recruits in  
11 military police training. *BMC Musculoskelet Disord*. 2013;14(1):32.
- 12 42. Hollingsworth D. The prevalence and impact of musculoskeletal injuries during  
13 a pre-deployment workup cycle: survey of a Marine Corps special operations company. *J*  
14 *Spec Oper Med*. 2009;9(4):11.
- 15 43. Carragee EJ, Cohen SP. Lifetime Asymptomatic for Back Pain: The Validity of  
16 Self-report Measures in Soldiers. *Spine*. 2009;34(9):978-83  
17 10.1097/BRS.0b013e318198d517.
- 18 44. These MS, Hegmann KT, Wood EM, Garg A, Moore JS, Kapellusch J, et al.  
19 Prevalence of low back pain by anatomic location and intensity in an occupational population.  
20 *BMC Musculoskelet Disord*. 2014;15(1):1.
- 21 45. Mattila VM, Sahi T, Jormanainen V, Pihlajamäki H. Low back pain and its risk  
22 indicators: a survey of 7,040 Finnish male conscripts. *Eur Spine J*. 2008;17(1):64-9.
- 23 46. Knapik JJ, Graham B, Cobbs J, Thompson D, Steelman R, Jones BH. A  
24 prospective investigation of injury incidence and risk factors among army recruits in combat  
25 engineer training. *J Occup Med Toxicol*. 2013;8(1):5.
- 26 47. Leboeuf-Yde C. Back pain—individual and genetic factors. *J Electromyogr*  
27 *Kinesiol*. 2004;14(1):129-33.
- 28 48. Garber CE, Blissmer B, Deschenes MR, Franklin BA, Lamonte MJ, Lee I-M, et  
29 al. American College of Sports Medicine position stand. Quantity and quality of exercise for  
30 developing and maintaining cardiorespiratory, musculoskeletal, and neuromotor fitness in  
31 apparently healthy adults: guidance for prescribing exercise. *Med Sci Sports Exerc*.  
32 2011;43(7):1334-59.
- 33 49. Headquarters Marine Corps. Marine Corps physical fitness test and body  
34 composition program manual. Washington, DC. (2002).
- 35 50. Vickers Jr RR. Construct Validity of Physical Fitness Tests. Naval Health  
36 Research Center, San Diego 2011. Report. No. 11-52.
- 37 51. Youdas JW, Amundson CL, Cicero KS, Hahn JJ, Harezlak DT, Hollman JH.  
38 Surface electromyographic activation patterns and elbow joint motion during a pull-up, chin-  
39 up, or perfect-pullup™ rotational exercise. *J Strength Cond Res*. 2010;24(12):3404-14.
- 40 52. Knapik JJ, Harman EA, Steelman RA, Graham BS. A systematic review of the  
41 effects of physical training on load carriage performance. *J Strength Cond Res*.  
42 2012;26(2):585-97.
- 43 53. Simpson K, Redmond JE, Cohen BS, Hendrickson NR, Spiering BA, Steelman  
44 R, et al. Quantification of physical activity performed during US Army Basic Combat  
45 Training. *US Army Med Dep J*. 2013;4:55-65.
- 46 54. Roos L, Boesch M, Sefidan S, Frey F, Mäder U, Annen H, et al. Adapted  
47 marching distances and physical training decrease recruits' injuries and attrition. *Mil Med*.  
48 2015;180(3):329-36.
- 49 55. Wyss T, Roos L, Hofstetter M-C, Frey F, Mäder U. Impact of training patterns  
50 on injury incidences in 12 Swiss Army basic military training schools. *Mil Med*.  
51 2014;179(1):49-55.
- 52  
53  
54  
55  
56  
57  
58  
59  
60

## Tables

**Table 1.** Self-reported independent variables, the form in which they were included in regression analysis, procedures for retrieving the data and rationale for categorisation.

| Independent variable                                   | Reference  | Exposure | Measurement procedure and variable management                                                                                                                                                                                                                                                                                                                                                                                                         |
|--------------------------------------------------------|------------|----------|-------------------------------------------------------------------------------------------------------------------------------------------------------------------------------------------------------------------------------------------------------------------------------------------------------------------------------------------------------------------------------------------------------------------------------------------------------|
| <b>Physical characteristics</b>                        |            |          |                                                                                                                                                                                                                                                                                                                                                                                                                                                       |
| Body weight                                            | Continuous |          | Body weight (in Kg) was self-reported and analysed as a continuous variable in the models.                                                                                                                                                                                                                                                                                                                                                            |
| Body Height                                            | > 1.80m    | ≤1.80m   | Body height was self-reported. Based on the hypothesis that being either “too tall or too short” may be negative for musculoskeletal health in this environment, as previously identified for this population (4), <i>body height</i> was initially categorised as ≤1.80m, 1.81-1.85m ( <i>reference</i> ) and ≥1.86m, but was reduced to a dichotomised variable due to no difference between the upper and the reference category being identified. |
| <b>Rated health/health history</b>                     |            |          |                                                                                                                                                                                                                                                                                                                                                                                                                                                       |
| Back Pain; within 6 mo. prior to course start          | No         | Yes      | Self-reported musculoskeletal pain in the lower and/or thoracic back , defined as “ <i>Pain a couple of days per month or less</i> ” or “ <i>Pain a couple of days per week or more</i> ” within the past six months, analysed dichotomised as <i>yes</i> or <i>no</i> as previously for this population (4, 14).                                                                                                                                     |
| Hip/Knee Pain; within 6 mo. prior to course start      | No         | Yes      | Self-reported occurrence of musculoskeletal pain in the <i>hip</i> and/or <i>knee</i> , defined as “ <i>Pain a couple of days per month or less</i> ” or “ <i>Pain a couple of days per week or more</i> ” within the past six months, analysed dichotomised as <i>yes</i> or <i>no</i> , as previously for this population.                                                                                                                          |
| Neck/Shoulder Pain; within 6 mo. prior to course start | No         | Yes      | Self-reported musculoskeletal pain in the <i>neck</i> and/or <i>shoulder</i> , defined as “ <i>Pain a couple of days per month or less</i> ” or “ <i>Pain a couple of days per week or more</i> ” within the past six months, analysed dichotomised as <i>yes</i> or <i>no</i> , as previously in this population.                                                                                                                                    |
| Mental distress                                        | <4         | ≥4       | The level of mental distress was captured by the General Health Questionnaire-12 (15), a                                                                                                                                                                                                                                                                                                                                                              |

(GHQ-12 Score)

widely used screening instrument developed to detect "cases" of mental distress. It is a 12-question tool, summed up to give an overall score, ranging from 0 to 12, and a cut off of 4 points or more is considered an indication of clinically relevant mental distress (16). As such, "Mental distress" was categorised as  $\geq 4$  on the summary GHQ-12 scale.

| Work related                                        |                      |                                                   |                                                                                                                                                                                                                                                                                                                                                                                                                                                                                                                                                                                                                                                                                                                                                                                                                                           |
|-----------------------------------------------------|----------------------|---------------------------------------------------|-------------------------------------------------------------------------------------------------------------------------------------------------------------------------------------------------------------------------------------------------------------------------------------------------------------------------------------------------------------------------------------------------------------------------------------------------------------------------------------------------------------------------------------------------------------------------------------------------------------------------------------------------------------------------------------------------------------------------------------------------------------------------------------------------------------------------------------------|
| Current work ability with regard to best ever       | $\geq 9$             | $< 9$                                             | Self-rated work ability captured with the single item question from the work ability index (11). Current work ability was rated, with regard to ever best, on a 10-point ordinal scale. Based on the hypothesis that "less-than-optimal" work ability could constitute a risk in this environment, the responses were dichotomised as high ( $\geq 9$ ) (reference) and moderate ( $< 9$ ).                                                                                                                                                                                                                                                                                                                                                                                                                                               |
| Direct from basic military training (within 3 mo. ) | No                   | Yes                                               | Finishing basic military training within three months of the course start was considered a risk, due to the assumption that these soldiers had had less time to adapt to load carriage within the military. Therefore dichotomised as <i>yes</i> or <i>no</i> (reference).                                                                                                                                                                                                                                                                                                                                                                                                                                                                                                                                                                |
| Physical training habits                            |                      |                                                   |                                                                                                                                                                                                                                                                                                                                                                                                                                                                                                                                                                                                                                                                                                                                                                                                                                           |
| Physical training; sessions per week                | $> 2$ sessions /week | $\leq 2$ sessions /week                           | Average number of training sessions per week, exceeding 20 minutes, were rated on a five point ordinal scale as $\leq 1$ day/week, 2 days/week, 3-4 days/week and $\geq 5$ day/week. This item was derived (in addition to an increased number of maximum sessions) from items previously used in several public health cohorts in Sweden (17, 18). A U-shaped relationship with LBP was hypothesised for number of physical training sessions per week, i.e. too little and too much training may both be risks for LBP. Consequently, the training sessions per week variable was categorised as $\leq 2$ session/week, 3-4 sessions/week (reference) and $\geq 5$ sessions/week, but reduced to a dichotomised variable for LBP limiting work ability as no significant difference between the upper and reference category was found. |
| Muscular strength training; session per week        | 2-4 sessions /week   | $\leq 1$ sessions /week<br>$\geq 5$ sessions/week | A U-shaped relationship with LBP was hypothesised for number of strength training sessions per week, i.e. too little and too much training may both be risks for LBP. Consequently <i>Weekly strength training</i> was categorised as $\leq 1$ session/week, 2-4 sessions/week (reference) and $\geq 5$ sessions/week.                                                                                                                                                                                                                                                                                                                                                                                                                                                                                                                    |

|                                             |                  |                    |                                                                                                                                                                                                                                                                                                                              |
|---------------------------------------------|------------------|--------------------|------------------------------------------------------------------------------------------------------------------------------------------------------------------------------------------------------------------------------------------------------------------------------------------------------------------------------|
|                                             |                  | sessions<br>/week  |                                                                                                                                                                                                                                                                                                                              |
| Aerobic fitness training; sessions per week | >1 session /week | ≤ 1 sessions /week | <i>Weekly aerobic training</i> was dichotomised as ≤1 session/week or >1 ( <i>reference</i> ), given two session per week a priori considered to be a realistic minimal amount of cardio vascular training necessary to maintain sufficient aerobic capacity during the physically demanding basic military training course. |

**Table 2.** Physical test; independent variables, the form in which they were included in regression analysis, procedures for retrieving the data and rationale for categorisation.

| Independent variable               | Reference | Exposure | Measurement procedure and variable management                                                                                                                                                                                                                                                                                                                                                                                                                                                                                                                                                                                                                                                                  |
|------------------------------------|-----------|----------|----------------------------------------------------------------------------------------------------------------------------------------------------------------------------------------------------------------------------------------------------------------------------------------------------------------------------------------------------------------------------------------------------------------------------------------------------------------------------------------------------------------------------------------------------------------------------------------------------------------------------------------------------------------------------------------------------------------|
| <b>Strength tests</b>              |           |          |                                                                                                                                                                                                                                                                                                                                                                                                                                                                                                                                                                                                                                                                                                                |
| Kettlebells lift; kg x repetitions | > 760     | ≤760     | Pairs of kettlebells weighing 32, 24, or 16 kg each were used. The intended test weights were 2x32 kg, but subjects unable to perform the test safely with these loads could choose the lighter kettlebells. To make sure that the correct and safe lifting technique was used, all participants performed two test-lifts using a lower weight while being supervised by the test leader. The test measured the number of (correct) lifts of the weights performed in one minute. Based on the assumption that marines with the lowest lifting capacity are at greater risk of LBP, the lower tertile of the product of “numbers of lifts x weight lifted” was compared to the upper two tertiles (reference). |
| Pull-up; number of repetitions     | ≥ 4       | ≤ 3      | Hanging from a pull-up bar, using an overhand grip with hands placed shoulder-width apart, the participants lifted their body until their chin was level with the bar. The number of (correct) lifts performed in one minute was recorded in the test protocol. The number of correct ‘chins’ is dichotomised as ≤3 or ≥4 ( <i>reference</i> ). Internationally, the cut-off for passing a pull-up test during                                                                                                                                                                                                                                                                                                 |

yearly physical assessments for marines ranges from 3 (US marines) to 5 (Royal Marines) and as such, assuming that marines with the lowest pull-up capacity are at greater risk of LBP, the cut-off for the reference category was set at the median,  $\geq 4$  pull-ups (*reference*).

|                                            |      |      |                                                                                                                                                                                                                                                                                                                                                                                                                                                                                                                                                                                                                                                                               |
|--------------------------------------------|------|------|-------------------------------------------------------------------------------------------------------------------------------------------------------------------------------------------------------------------------------------------------------------------------------------------------------------------------------------------------------------------------------------------------------------------------------------------------------------------------------------------------------------------------------------------------------------------------------------------------------------------------------------------------------------------------------|
| <b>Movement control tests</b>              |      |      | <i>To make sure failure of any of the movement control tests was due to a “real” inability to control direction and not unfamiliarity with the test movement, all participants performed the test three to six times with feedback from the tester to ensure familiarisation. To monitor the movement of the lumbar spine, an air-filled pressure sensor (Pressure Biofeedback Unit, Chattanooga Group, Hixson, TN) was placed under the lower back.</i>                                                                                                                                                                                                                      |
| Double Leg Lift & Lower                    | pass | fail | The test assesses the ability to prevent extension and flexion of the lumbar spine (34). The subject, from a supine position, lifts both feet off the bench to a 90° hip flexion, and then lowers them back to the bench. Any uncontrolled movements in flexion or extension, defined as an $\geq 5$ mmHg change (from the starting pressure of 40mmHg), were recorded on the test protocol. Test performance on <i>flexion</i> and <i>extension</i> assessed in the tests was analysed as pass or fail.                                                                                                                                                                      |
| Double Leg Lift & Alternate Leg Extension: | pass | fail | The test assesses the ability to prevent extension, flexion and rotation of the lumbar spine, and leg abduction, lateral rotation, and hip forward glide (34). The subject, from a supine position lifts both feet off the bench to a 90° hip flexion, then lowers and straightens one leg to a fully extended position and then back to a 90° hip flexion, before repeating the test on the other side. The direction of any uncontrolled movements, defined as $\geq 5$ mmHg change (from the starting pressure of 40mmHg), was recorded on the test protocol. Test performance for <i>flexion</i> and <i>extension</i> assessed in the tests was analysed as pass or fail. |

**Table 3.** Demographic characteristics, physical characteristics and self-rated health at baseline.

|                                                         | <b>Mean</b> | <b>SD</b>     |
|---------------------------------------------------------|-------------|---------------|
| Age (years) <sup>a</sup>                                | 21.8        | 3.4           |
| Body weight (kg)                                        | 80.0        | 10.1          |
| Body height (m)                                         | 1.82        | 0.07          |
| Body mass index (kg/m <sup>2</sup> )                    | 24.1        | 2.5           |
| GHQ-12 Score                                            | 1.8         | 1.6           |
| Muscular strength training; hours per week <sup>a</sup> | 4.5         | 2.7           |
| Aerobic fitness training; hours per week <sup>b</sup>   | 3.1         | 1.9           |
|                                                         | <b>%</b>    | <b>95% CI</b> |
| Smoking                                                 |             |               |
| No                                                      | 71.7        | 58.4-82.0     |
| Occasionally                                            | 28.3        | 18.0-42.6     |
| Yes                                                     | 0.0         | 0.0-6.8       |
| Snus (smokeless tobacco)                                |             |               |
| No                                                      | 64.2        | 50.7-75.7     |
| Occasionally                                            | 11.3        | 5.3-22.6      |
| Yes                                                     | 24.5        | 14.9-37.6     |
| <b>Baseline testing</b>                                 | <b>Mean</b> | <b>SD</b>     |
| Pull-ups                                                | 7.8         | 5.2           |
| Kettlebell lifts                                        |             |               |
| Average lifts                                           | 17.6        | 6.4           |
| Kettlebell, average weight (x2)                         | 29.8        | 4.1           |
|                                                         | <b>%</b>    | <b>95% CI</b> |
| MCM-Tests, per direction;                               |             |               |
| DLL-L Flex; Fail                                        | 19.2        | 10.8-31.9     |
| DLL-L Ext; Fail                                         | 34.6        | 23.2-48.2     |
| DLL-ALE Flex; Fail                                      | 19.6        | 11.0-32.5     |
| DLL-ALE Ext; Fail                                       | 43.1        | 30.1-56.7     |

Note: Reported with mean and standard deviation (SD) or percentage and corresponding 95% Wilson Score confidence interval (95% CI).

<sup>a</sup>Average weekly hours of muscular strength training during previous six months (median (interquartile range) all; 4(3.5), males; 4(3.5), females 3(3)).

<sup>b</sup>Average weekly hours of aerobic fitness training during previous six months (median (interquartile range) all; 3(2), males; 3(2), females 5(3)).



1  
2  
3  
4  
5  
6  
7  
8  
9  
10  
11  
12  
13  
14  
15  
16  
17  
18  
19  
20  
21  
22  
23  
24  
25  
26  
27  
28  
29  
30  
31  
32  
33  
34  
35  
36  
37  
38  
39  
40  
41  
42  
43  
44  
45  
46  
47

**Table 4.** Regression analyses of individual physical characteristics, work- and health-related risk variables: univariate and multiple final adjusted<sup>†</sup> hazard ratio (HR) for low back pain (LBP) during the marine training course.

| Variable                                               | Univariate |        |         | Final Crude Multivariable |        |         | Final Adjusted Multivariable <sup>a</sup> |        |         |      |      |        |
|--------------------------------------------------------|------------|--------|---------|---------------------------|--------|---------|-------------------------------------------|--------|---------|------|------|--------|
|                                                        | HR         | 95% CI | P value | HR                        | 95% CI | P value | HR                                        | 95% CI | P value |      |      |        |
| <b>Physical characteristics</b>                        |            |        |         |                           |        |         |                                           |        |         |      |      |        |
| Body weight (kg)                                       | 1.01       | 0.99   | 1.03    | 0.441                     |        |         |                                           |        |         |      |      |        |
| Body Height ≤ 1.80 (m)                                 | 1.48       | 0.84   | 2.58    | 0.172                     | 1.73   | 1.03    | 2.92                                      | 0.040  | 1.98    | 1.19 | 3.29 | 0.009  |
| <b>Rated health/health history</b>                     |            |        |         |                           |        |         |                                           |        |         |      |      |        |
| Mental distress (GHQ-12 Score)                         | 2.08       | 0.65   | 6.70    | 0.219                     |        |         |                                           |        |         |      |      |        |
| Back Pain; within 6 mo. prior to course start          | 2.00       | 1.09   | 3.64    | 0.025                     | 2.26   | 1.27    | 4.03                                      | 0.006  | 2.47    | 1.41 | 4.31 | <0.001 |
| Hip/Knee Pain; within 6 mo. prior to course start      | 1.50       | 0.85   | 2.66    | 0.163                     |        |         |                                           |        |         |      |      |        |
| Neck/Shoulder Pain; within 6 mo. prior to course start | 1.63       | 0.91   | 2.90    | 0.098                     |        |         |                                           |        |         |      |      |        |
| <b>Work-related</b>                                    |            |        |         |                           |        |         |                                           |        |         |      |      |        |
| Current Work ability with regard to best ever          | 1.69       | 0.97   | 2.94    | 0.064                     |        |         |                                           |        |         |      |      |        |
| Direct from basic military training (within 3 mo.)     | 1.08       | 0.62   | 1.91    | 0.779                     |        |         |                                           |        |         |      |      |        |

**Table 4. cont.**

|                                               | Univariate |        |         | Final Crude Multivariable |        |         | Final Adjusted Multivariable <sup>a</sup> |        |         |
|-----------------------------------------------|------------|--------|---------|---------------------------|--------|---------|-------------------------------------------|--------|---------|
|                                               | HR         | 95% CI | P value | HR                        | 95% CI | P value | HR                                        | 95% CI | P value |
| <b>Physical training habits past 6 months</b> |            |        |         |                           |        |         |                                           |        |         |
| Physical training;                            |            |        |         |                           |        |         |                                           |        |         |
| ≤ 2 sessions/week                             | 1.18       | 0.53   | 2.64    | 0.692                     |        |         |                                           |        |         |
| 3-4 sessions/week                             | 1.00       |        |         |                           |        |         |                                           |        |         |
| ≥ 5 sessions/week                             | 1.29       | 0.70   | 2.37    | 0.418                     |        |         |                                           |        |         |
| Muscular strength training;                   |            |        |         |                           |        |         |                                           |        |         |
| ≤ 1 sessions/week                             | 0.90       | 0.52   | 1.54    | 0.690                     |        |         |                                           |        |         |
| 2-4 sessions/week                             | 1.00       |        |         |                           |        |         |                                           |        |         |
| ≥ 5 sessions/week                             | 1.27       | 0.58   | 2.78    | 0.542                     |        |         |                                           |        |         |
| Aerobic fitness training;                     |            |        |         |                           |        |         |                                           |        |         |
| ≤ 1 session/week                              | 1.24       | 0.66   | 2.36    | 0.502                     |        |         |                                           |        |         |

<sup>a</sup> Adjusted for confounding effect of sex

**Table 5.** Regression analyses of individual physical characteristics, work- and health-related risk variables: univariate and multiple final adjusted† hazard ratio (HR) for low back pain (LBP) limiting work ability during the marine training course.

| Variable                                               | Univariate |        |         | Final Crude Multivariable |        |         | Final Adjusted Multivariable <sup>a</sup> |        |         |      |      |        |
|--------------------------------------------------------|------------|--------|---------|---------------------------|--------|---------|-------------------------------------------|--------|---------|------|------|--------|
|                                                        | HR         | 95% CI | P value | HR                        | 95% CI | P value | HR                                        | 95% CI | P value |      |      |        |
| <b>Physical characteristics</b>                        |            |        |         |                           |        |         |                                           |        |         |      |      |        |
| Body weight (kg)                                       | 1.00       | 0.96   | 1.04    | 0.991                     |        |         |                                           |        |         |      |      |        |
| Body Height ≤1.80 (m)                                  | 2.20       | 0.96   | 5.03    | 0.062                     | 3.04   | 1.35    | 6.86                                      | 0.007  | 4.48    | 2.01 | 9.97 | <0.001 |
| <b>Rated health/health history</b>                     |            |        |         |                           |        |         |                                           |        |         |      |      |        |
| Back Pain; within 6 mo. prior to course start          | 2.48       | 1.04   | 5.91    | 0.040                     | 4.47   | 1.80    | 11.11                                     | 0.001  | 3.58    | 1.44 | 8.90 | 0.006  |
| Hip/Knee Pain; within 6 mo. prior to course start      | 1.15       | 0.41   | 3.23    | 0.784                     |        |         |                                           |        |         |      |      |        |
| Neck/Shoulder Pain; within 6 mo. prior to course start | 2.79       | 1.18   | 6.57    | 0.019                     |        |         |                                           |        |         |      |      |        |
| <b>Work-related</b>                                    |            |        |         |                           |        |         |                                           |        |         |      |      |        |
| Current Work ability with regard to best ever          | 1.74       | 0.68   | 4.40    | 0.246                     |        |         |                                           |        |         |      |      |        |
| Direct from basic military training (within 3 mo.)     | 1.71       | 0.73   | 4.00    | 0.218                     |        |         |                                           |        |         |      |      |        |
| <b>Physical training habits past 6 months</b>          |            |        |         |                           |        |         |                                           |        |         |      |      |        |
| Physical training; ≤ 2 sessions/week                   | 1.87       | 0.78   | 4.49    | 0.161                     | 3.23   | 1.41    | 7.40                                      | 0.006  | 2.96    | 1.19 | 7.39 | 0.020  |
| Muscular strength training;                            |            |        |         |                           |        |         |                                           |        |         |      |      |        |

1  
2  
3  
4  
5  
6  
7  
8  
9  
10  
11  
12  
13  
14  
15  
16  
17  
18  
19  
20  
21  
22  
23  
24  
25  
26  
27  
28  
29  
30  
31  
32  
33  
34  
35  
36  
37  
38  
39  
40  
41  
42  
43  
44  
45  
46  
47

|                           |      |      |      |       |
|---------------------------|------|------|------|-------|
| ≤ 1 sessions/week         | 0.86 | 0.30 | 2.43 | 0.774 |
| 2-4 sessions/week         | 1.00 |      |      |       |
| ≥ 5 sessions/week         | 1.82 | 0.79 | 4.22 | 0.161 |
| Aerobic fitness training; |      |      |      |       |
| ≤ 1 sessions/week         | 1.41 | 0.63 | 3.15 | 0.408 |

---

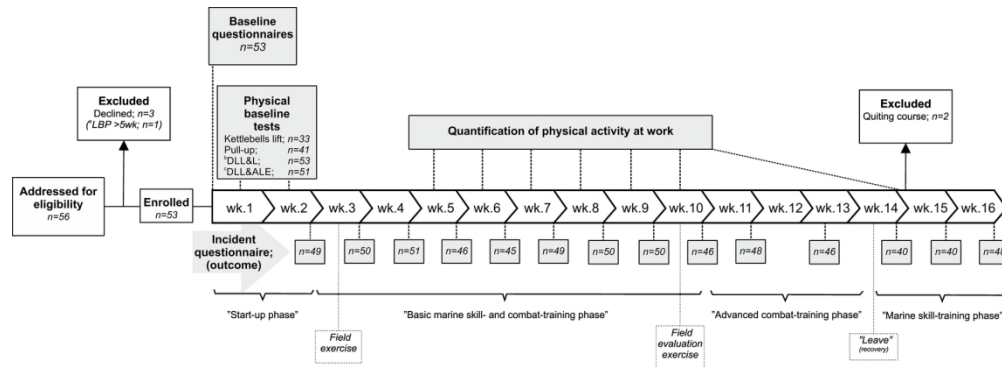

Recruitment and measurement procedure, number of subjects included, excluded and weekly follow ups (wk.) during the marine training course. The main focus of the different phases of the course is given together with longer field exercises and leave periods. <sup>a</sup>One subject excluded from analysis based on LBP incidence, due to LBP at baseline that lasted for more than additional five course weeks. <sup>b</sup>DLL&L; Double Leg Lift & Lower test. <sup>c</sup>DLL&ALE; Double Leg Lift & Alternate Leg Extension.

77x28mm (600 x 600 DPI)

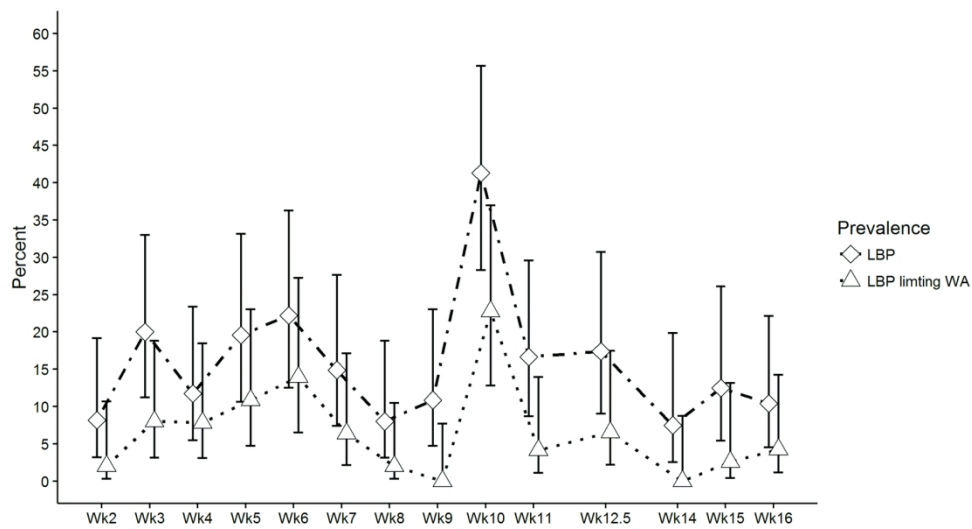

Figure 2. Weekly (Wk.) prevalence of LBP and LBP limiting work ability during the marine training course, reported as weekly proportion (percent) of cohort under study. Error bars indicate 95% confidence interval.

79x44mm (600 x 600 DPI)

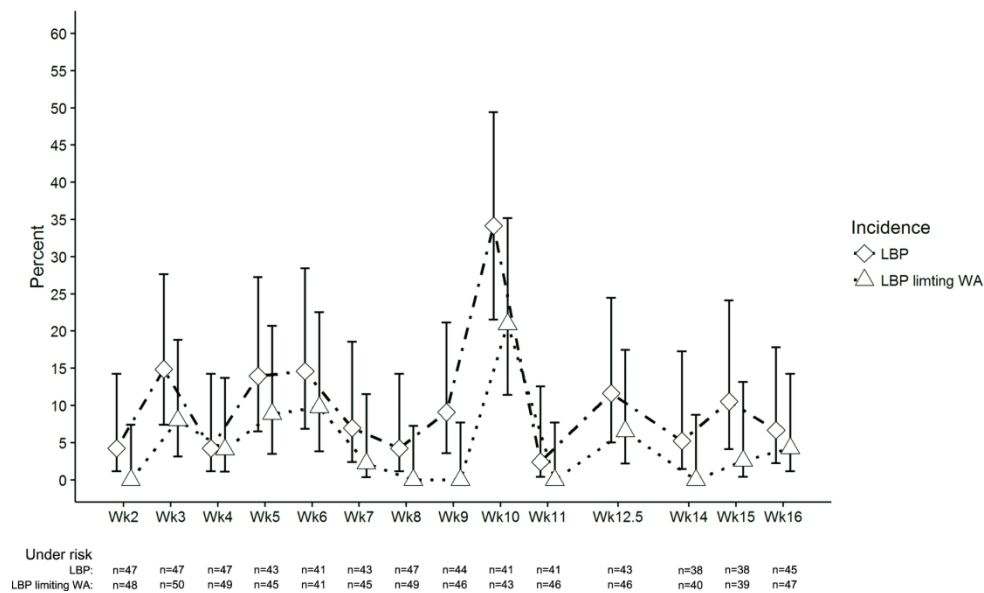

Figure 3. Weekly (Wk.) incidence of LBP and LBP limiting work ability during the marine training course. Incidence reported as weekly percent of new pain episodes of marines at risk, with 95% confidence interval (error bars) and marines at risk for new event of LBP/LBP limiting work ability.

84x49mm (600 x 600 DPI)

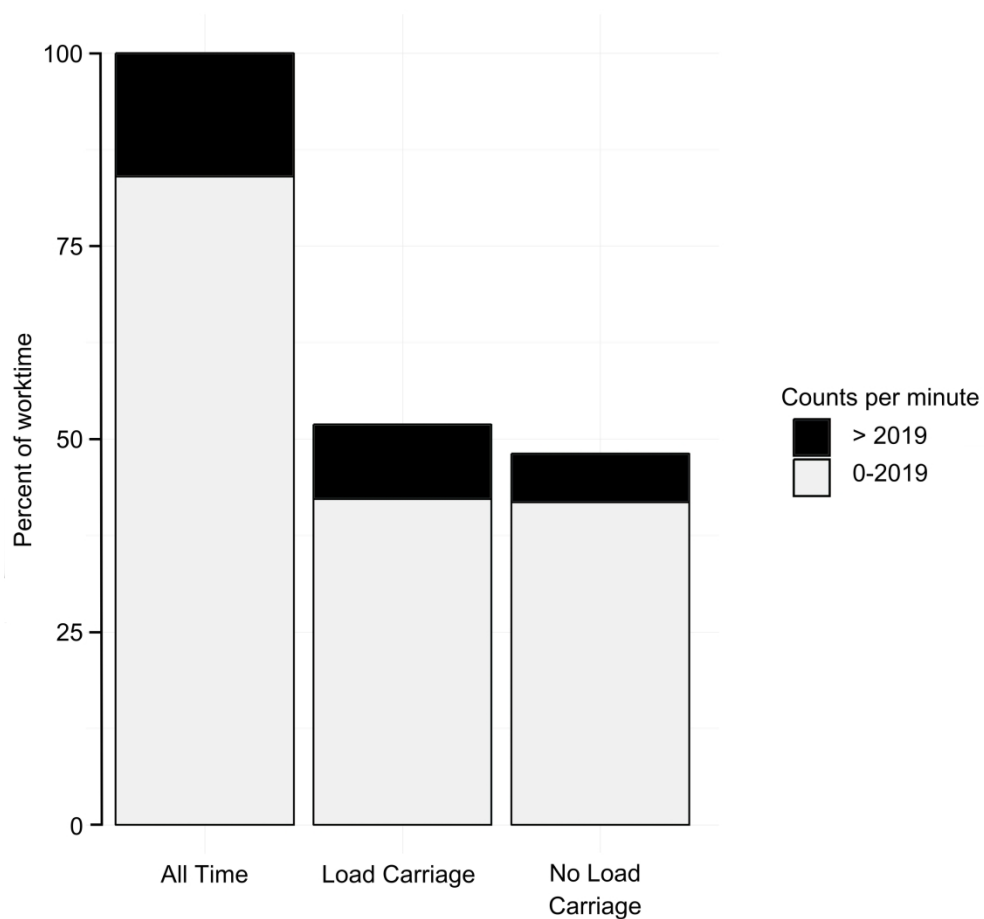

Figure 4. Proportions of work time spent in occupational physical activity generating more and less than 2020 counts per minute; in total, with, and without combat load carriage ( $\geq 17.5$  kg). Work time is based on an average weekly work-time of 38 hrs (not including long distance march training, combat obstacle course or aquatic training, constituting a weekly average of an additional 2 hrs).

110x109mm (600 x 600 DPI)



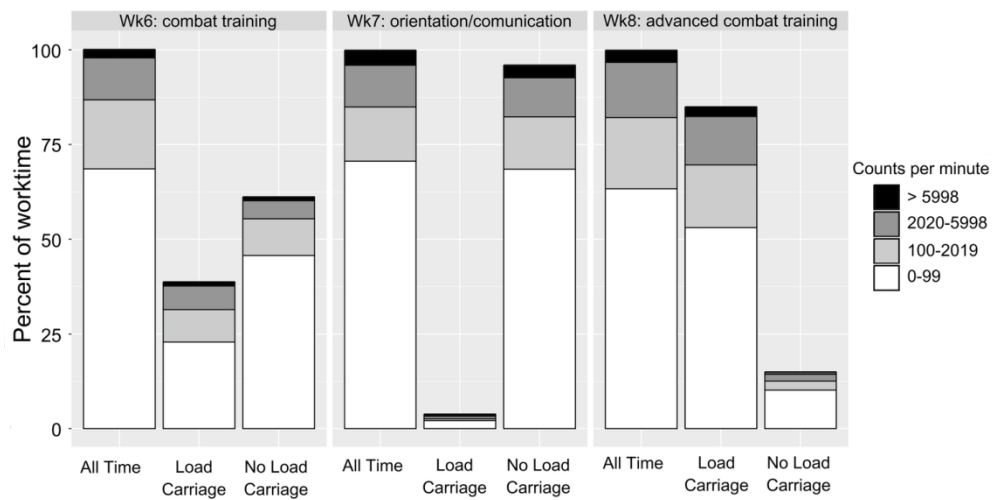

Figure 5. Proportions of work time in occupational physical activity reported per category of physical intensity (42), for total work time and time with/without combat load carriage ( $\geq 17.5\text{Kg}$ ) for three consecutive course weeks with different learning objectives; "combat training (course week 6)", "orientation and communication (course week 7)" and "advanced combat training (course week 8)".

65x33mm (600 x 600 DPI)

# Low back pain in the marine training course: A study of incidence, risk factors, and occupational physical activity

## Supplementary Files

**Supplementary Table 1.** Incidence rate (IR) based on time to first LBP, and LBP limiting work-ability, episode during the marine training course.

|                      | LBP              |      |          | LBP limiting work ability |     |         |
|----------------------|------------------|------|----------|---------------------------|-----|---------|
|                      | Time at risk     | IR   | 95%CI    | Time at risk              | IR  | 95%CI   |
| Per 100 person-weeks | 398 person weeks | 9.0  | 6.5-12.5 | 539 person weeks          | 3.9 | 2.5-6.0 |
| Per 1000 person-days | 2786 person days | 12.9 | 9.3-17.9 | 3773 person days          | 5.6 | 3.6-8.5 |

**Supplementary Table 2.** Regression analyses of clinical tests: univariate and multiple final adjusted<sup>†</sup> hazard ratio (HR) for low back pain during the marine training course.

|                                                   | Univariate |        |         | Final Adjusted Model <sup>a</sup> |        |                 |
|---------------------------------------------------|------------|--------|---------|-----------------------------------|--------|-----------------|
|                                                   | HR         | 95% CI | P value | HR                                | 95% CI | P value         |
| <b>Physical/clinical tests</b>                    |            |        |         |                                   |        |                 |
| Kettlebell lifts; kg*rep<br>≤760 (lowest tertile) | 1.48       | 0.82   | 2.67    | 0.198                             |        |                 |
| <b>Sensitivity analysis</b>                       |            |        |         |                                   |        |                 |
| CC (i.e. only male)                               | 1.44       | 0.76   | 2.7     | 0.261                             |        |                 |
| Imputed (only male)                               | 1.48       | 0.75   | 2.91    | 0.256                             |        |                 |
| Pull-ups<br>≤3                                    | 1.99       | 1.11   | 3.56    | 0.020                             | 1.87   | 1.17 3.01 0.009 |
| <b>Sensitivity analysis</b>                       |            |        |         |                                   |        |                 |
| CC (i.e. only male)                               | 2.00       | 1.10   | 3.66    | 0.025                             | 1.82   | 1.16 2.88 0.009 |
| Imputed (only male)                               | 1.94       | 1.06   | 3.54    | 0.032                             | 1.81   | 1.13 2.91 0.014 |
| <b>MCM-Tests,<br/>direction specific;</b>         |            |        |         |                                   |        |                 |
| DLL-L Flex; <i>Fail</i>                           | 0.82       | 0.39   | 1.75    | 0.613                             |        |                 |
| DLL-L Ext; <i>Fail</i>                            | 0.82       | 0.47   | 1.46    | 0.508                             |        |                 |
| DLL-ALE Flex; <i>Fail</i>                         | 0.71       | 0.32   | 1.56    | 0.388                             |        |                 |
| DLL-ALE Ext; <i>Fail</i>                          | 1.35       | 0.76   | 2.40    | 0.310                             |        |                 |

<sup>a</sup>Adjusted for prior back pain and body height

Abbreviations; CC; complete cases, DLL-L Flex; Double leg lift-lower lumbar flexion-control, DLL-L Ext; Double leg lift-lower lumbar extension-control, DLL-ALE Flex; Double leg lift-alternate leg extension lumbar flexion-control, DLL-L Ext; Double leg lift-alternate leg extension lumbar extension-control.

**Supplementary Table 3.** Regression analyses of clinical tests: univariate hazard ratio (HR) for low back pain limiting work ability during the marine training course.

|                                                   | HR   | 95% CI    | P value |
|---------------------------------------------------|------|-----------|---------|
| <b>Physical/clinical tests</b>                    |      |           |         |
| Kettlebell lifts; kg*rep<br>≤760 (lowest tertile) | 1.02 | 0.67 1.54 | 0.923   |
| <b>Sensitivity analysis</b>                       |      |           |         |
| Complete cases (i.e. only male)                   | 1.10 | 0.31 3.92 | 0.884   |
| Imputed (only male)                               | 1.12 | 0.37 3.39 | 0.834   |
| Pull-ups<br>≤ 3                                   | 1.02 | 0.75 1.38 | 0.912   |
| <b>Sensitivity analysis</b>                       |      |           |         |
| Complete cases (i.e. only male)                   | 1.23 | 0.42 3.64 | 0.709   |
| Imputed (only male)                               | 1.29 | 0.46 3.60 | 0.631   |
| <b>MCM-Tests, direction specific;</b>             |      |           |         |
| DLL-L Flex; <i>Fail</i>                           | 0.71 | 0.21 2.43 | 0.587   |
| DLL-L Ext; <i>Fail</i>                            | 0.85 | 0.35 2.06 | 0.715   |
| DLL-ALE Flex; <i>Fail</i>                         | 0.76 | 0.23 2.54 | 0.650   |
| DLL-ALE Ext; <i>Fail</i>                          | 0.71 | 0.29 1.73 | 0.452   |

Abbreviations; DLL-L Flex; Double leg lift-lower lumbar flexion-control, DLL-L Ext; Double leg lift-lower lumbar extension-control, DLL-ALE Flex; Double leg lift-alternate leg extension lumbar flexion-control, DLL-L Ext; Double leg lift-alternate leg extension lumbar extension-control.

**STROBE 2007 (v4) Statement—Checklist of items that should be included in reports of *cohort studies***

| Section/Topic            | Item # | Recommendation                                                                                                                                                                       | Reported on page #      |
|--------------------------|--------|--------------------------------------------------------------------------------------------------------------------------------------------------------------------------------------|-------------------------|
| Title and abstract       | 1      | (a) Indicate the study's design with a commonly used term in the title or the abstract                                                                                               | Page 3                  |
|                          |        | (b) Provide in the abstract an informative and balanced summary of what was done and what was found                                                                                  | Page 3                  |
| <b>Introduction</b>      |        |                                                                                                                                                                                      |                         |
| Background/rationale     | 2      | Explain the scientific background and rationale for the investigation being reported                                                                                                 | Page 5                  |
| Objectives               | 3      | State specific objectives, including any prespecified hypotheses                                                                                                                     | Page 5                  |
| <b>Methods</b>           |        |                                                                                                                                                                                      |                         |
| Study design             | 4      | Present key elements of study design early in the paper                                                                                                                              | Page 6                  |
| Setting                  | 5      | Describe the setting, locations, and relevant dates, including periods of recruitment, exposure, follow-up, and data collection                                                      | Page 6 and Fig.1        |
| Participants             | 6      | (a) Give the eligibility criteria, and the sources and methods of selection of participants. Describe methods of follow-up                                                           | Page 6 and 8            |
|                          |        | (b) For matched studies, give matching criteria and number of exposed and unexposed                                                                                                  | Not applicable          |
| Variables                | 7      | Clearly define all outcomes, exposures, predictors, potential confounders, and effect modifiers. Give diagnostic criteria, if applicable                                             | Pages 8-9 and Table 1-2 |
| Data sources/measurement | 8*     | For each variable of interest, give sources of data and details of methods of assessment (measurement). Describe comparability of assessment methods if there is more than one group | Table 1-2               |
| Bias                     | 9      | Describe any efforts to address potential sources of bias                                                                                                                            | Page 9                  |
| Study size               | 10     | Explain how the study size was arrived at                                                                                                                                            | Page 6                  |
| Quantitative variables   | 11     | Explain how quantitative variables were handled in the analyses. If applicable, describe which groupings were chosen and why                                                         | Table 1-2               |
| Statistical methods      | 12     | (a) Describe all statistical methods, including those used to control for confounding                                                                                                | Page 9 and 10           |
|                          |        | (b) Describe any methods used to examine subgroups and interactions                                                                                                                  | Page 10                 |
|                          |        | (c) Explain how missing data were addressed                                                                                                                                          | Page 9                  |
|                          |        | (d) If applicable, explain how loss to follow-up was addressed                                                                                                                       | Pages 8,9 and Fig.1     |
|                          |        | (e) Describe any sensitivity analyses                                                                                                                                                | Page 9                  |
| <b>Results</b>           |        |                                                                                                                                                                                      | Page 9                  |

|                          |     |                                                                                                                                                                                                              |                                               |
|--------------------------|-----|--------------------------------------------------------------------------------------------------------------------------------------------------------------------------------------------------------------|-----------------------------------------------|
| Participants             | 13* | (a) Report numbers of individuals at each stage of study—eg numbers potentially eligible, examined for eligibility, confirmed eligible, included in the study, completing follow-up, and analysed            | Page 6, Fig 1. and Fig.3                      |
|                          |     | (b) Give reasons for non-participation at each stage                                                                                                                                                         | Page 6, Fig 1. and Fig.3                      |
|                          |     | (c) Consider use of a flow diagram                                                                                                                                                                           | Fig 1.                                        |
| Descriptive data         | 14* | (a) Give characteristics of study participants (eg demographic, clinical, social) and information on exposures and potential confounders                                                                     | Page 6 and table 3                            |
|                          |     | (b) Indicate number of participants with missing data for each variable of interest                                                                                                                          | Page 9                                        |
|                          |     | (c) Summarise follow-up time (eg, average and total amount)                                                                                                                                                  | Supplementary Table 3.                        |
| Outcome data             | 15* | Report numbers of outcome events or summary measures over time                                                                                                                                               | Page 11, Fig. 2-3 and Supplementary Table 3.  |
| Main results             | 16  | (a) Give unadjusted estimates and, if applicable, confounder-adjusted estimates and their precision (eg, 95% confidence interval). Make clear which confounders were adjusted for and why they were included | Page 11, Table 4-5 and Supplementary Table 4. |
|                          |     | (b) Report category boundaries when continuous variables were categorized                                                                                                                                    | Tables 1 and 2                                |
|                          |     | (c) If relevant, consider translating estimates of relative risk into absolute risk for a meaningful time period                                                                                             |                                               |
| Other analyses           | 17  | Report other analyses done—eg analyses of subgroups and interactions, and sensitivity analyses                                                                                                               | Page 11, Table 3-4 and Supplementary Table 4. |
| <b>Discussion</b>        |     |                                                                                                                                                                                                              |                                               |
| Key results              | 18  | Summarise key results with reference to study objectives                                                                                                                                                     | Page 12                                       |
| <b>Limitations</b>       |     |                                                                                                                                                                                                              |                                               |
| Interpretation           | 20  | Give a cautious overall interpretation of results considering objectives, limitations, multiplicity of analyses, results from similar studies, and other relevant evidence                                   | Pages 12-14                                   |
| Generalisability         | 21  | Discuss the generalisability (external validity) of the study results                                                                                                                                        | Page 12                                       |
| <b>Other information</b> |     |                                                                                                                                                                                                              |                                               |
| Funding                  | 22  | Give the source of funding and the role of the funders for the present study and, if applicable, for the original study on which the present article is based                                                | Page 15                                       |

1  
2  
3  
4  
5 \*Give information separately for cases and controls in case-control studies and, if applicable, for exposed and unexposed groups in cohort and cross-sectional studies.  
6

7 **Note:** An Explanation and Elaboration article discusses each checklist item and gives methodological background and published examples of transparent reporting. The STROBE  
8 checklist is best used in conjunction with this article (freely available on the Web sites of PLoS Medicine at <http://www.plosmedicine.org/>, Annals of Internal Medicine at  
9 <http://www.annals.org/>, and Epidemiology at <http://www.epidem.com/>). Information on the STROBE Initiative is available at [www.strobe-statement.org](http://www.strobe-statement.org).  
10  
11  
12  
13  
14  
15  
16  
17  
18  
19  
20  
21  
22  
23  
24  
25  
26  
27  
28  
29  
30  
31  
32  
33  
34  
35  
36  
37  
38  
39  
40  
41  
42  
43  
44  
45  
46  
47

For peer review only

# BMJ Open

## Low back pain in the marine training course: A longitudinal observational study of back pain incidence, risk factors, and occupational physical activity in Swedish marine trainees

|                                 |                                                                                                                                                                                                                                                                                                                                                                                                                                                                                                                                                                                                                                                                                               |
|---------------------------------|-----------------------------------------------------------------------------------------------------------------------------------------------------------------------------------------------------------------------------------------------------------------------------------------------------------------------------------------------------------------------------------------------------------------------------------------------------------------------------------------------------------------------------------------------------------------------------------------------------------------------------------------------------------------------------------------------|
| Journal:                        | <i>BMJ Open</i>                                                                                                                                                                                                                                                                                                                                                                                                                                                                                                                                                                                                                                                                               |
| Manuscript ID                   | bmjopen-2018-025150.R1                                                                                                                                                                                                                                                                                                                                                                                                                                                                                                                                                                                                                                                                        |
| Article Type:                   | Research                                                                                                                                                                                                                                                                                                                                                                                                                                                                                                                                                                                                                                                                                      |
| Date Submitted by the Author:   | 26-Nov-2018                                                                                                                                                                                                                                                                                                                                                                                                                                                                                                                                                                                                                                                                                   |
| Complete List of Authors:       | Monnier, Andreas; Karolinska Institutet, Department of Neurobiology, Care Sciences and Society; Swedish Armed Forces, Military Academy Karlberg<br>Larsson, Helena; Karolinska Institutet, Department of Neurobiology, Care Sciences and Society; Swedish Armed Forces, Headquarters, Medical Services<br>Nero, Håkan; Lund University, Department of Orthopedics, Faculty of Medicine<br>Djupsjöbacka, Mats; University of Gävle, Department of Occupational and Public Health Sciences, Centre for Musculoskeletal Research<br>Ång, Björn; Dalarna University, School of Education, Health and Social Studies; Karolinska Institutet, Department of Neurobiology, Care Sciences and Society |
| <b>Primary Subject Heading</b>: | Epidemiology                                                                                                                                                                                                                                                                                                                                                                                                                                                                                                                                                                                                                                                                                  |
| Secondary Subject Heading:      | Epidemiology                                                                                                                                                                                                                                                                                                                                                                                                                                                                                                                                                                                                                                                                                  |
| Keywords:                       | Back pain < ORTHOPAEDIC & TRAUMA SURGERY, EPIDEMIOLOGY, OCCUPATIONAL & INDUSTRIAL MEDICINE, PREVENTIVE MEDICINE                                                                                                                                                                                                                                                                                                                                                                                                                                                                                                                                                                               |
|                                 |                                                                                                                                                                                                                                                                                                                                                                                                                                                                                                                                                                                                                                                                                               |

SCHOLARONE™  
Manuscripts

1  
2  
3  
4 **Low back pain in the marine training course: A longitudinal**  
5 **observational study of back pain incidence, risk factors,**  
6 **and occupational physical activity in Swedish marine**  
7 **trainees**  
8  
9  
10  
11  
12

13 Andreas Monnier<sup>1,2,3\*</sup>, Helena Larsson<sup>1,4</sup>, Håkan Nero<sup>5</sup>, Mats Djupsjöbacka<sup>6</sup>, and  
14 Björn O. Äng<sup>1,2,7</sup>  
15  
16  
17

18  
19 <sup>1</sup> Department of Neurobiology, Care Sciences and Society, Division of Physiotherapy,  
20 Karolinska Institutet, Huddinge, Sweden  
21

22 <sup>2</sup> School of Education, Health and Social Studies, Dalarna University, Falun, Sweden  
23

24 <sup>3</sup> Swedish Armed Forces, Military Academy Karlberg, Stockholm, Sweden  
25

26 <sup>4</sup>Swedish Armed Forces, Headquarters, Medical Services, Stockholm, Sweden  
27

28 <sup>5</sup> Department of Orthopedics, Faculty of Medicine, Lund University, Lund, Sweden  
29

30 <sup>6</sup> Centre for Musculoskeletal Research, Department of Occupational and Public Health  
31 Sciences, University of Gävle, Gävle, Sweden  
32  
33

34 <sup>7</sup> Center for Clinical Research, Uppsala University, Falun, Sweden  
35  
36  
37

38 \*Corresponding author  
39  
40

41 *Address for correspondence and reprint requests:*  
42  
43

44 E-mail: [andreas.monnier@ki.se](mailto:andreas.monnier@ki.se)  
45  
46  
47  
48  
49  
50  
51  
52  
53  
54  
55  
56  
57  
58  
59  
60



## Abstract

**Objectives:** To evaluate the occurrence of LBP and LBP that limits work ability, to identify their potential early risks and to quantify occupational physical activity in Swedish Armed Forces (SwAF) marines during their basic four-month marine training course.

**Design:** Prospective observational cohort study with weekly follow-ups.

**Participants:** Fifty-three SwAF marines entering the training course.

**Outcomes:** Incident of LBP and its related effect on work-ability, and associated early risks. Occupational physical activity, as monitored using accelerometers and self-reports.

**Results:** During the training course, 68% of the marines experienced at least one episode of LBP. This yielded a LBP and LBP limiting work ability incidence rate of 13.5 (95% CI 10.4–17.8) and 6.3 (95% CI 4.2–10.0) episodes per 1000 person-days, respectively. Previous back pain and shorter body height ( $\leq 1.80\text{m}$ ) emerged as independent risks for LBP (HR 2.5, 95% CI 1.4–4.3; HR 2.0, 95% CI 1.2–3.3, respectively), as well as for LBP that limited work ability (HR 3.6, 95% CI 1.4–8.9; 4.5, 95% CI 2.0–10.0, respectively). Furthermore, managing fewer than four pull-ups emerged as a risk for LBP (HR 1.9, 95% CI 1.2–3.0), while physical training of fewer than three sessions per week emerged as a risk for LBP that limited work ability (HR 3.0, 95% CI 1.2–7.4). More than 80% of the work time measured was spent performing low levels of ambulation, however, combat equipment ( $\geq 17.5\text{ Kg}$ ) was carried for more than half of the work time.

**Conclusions:** Incidents of LBP are common in SwAF marines' early careers. The link between LBP and previous pain as well as low levels of exercise highlights the need for preventive actions early on in a marine's career. The role of body height on LBP needs further investigation, including its relationship with body-worn equipment, before it can effectively contribute to LBP prevention.

## Strengths and limitations of this study

- The present unique prospective study design with weekly follow ups that is conducted early on in the marines' careers is believed to have a strong potential to fill knowledge gaps in LBP epidemiology in marine regiments and similar military units.
- The use of a repeated time-to-event regression method, with discontinued risk intervals, better reflects the recurrent nature of LBP, and makes more use of collected data than methods using single time-to-first events as an outcome.
- The definition of a new episode of LBP used in the present study does not distinguish between a new "uniquely" first event and a "symptom flare up" from a recurrent chain of events, which is a problem seen in most studies on back pain or other musculoskeletal pain problems.

- The results for the two physical “max” tests of pull-ups and kettle-bell lifts are limited to male marines only, as no female marines performed these tests.

**Keywords:** Back pain, longitudinal, military, musculoskeletal disorders, musculoskeletal injury, occupational exposure, physical test, prevention, work ability, work exposure.

For peer review only

## Background

Low back pain (LBP) is an epidemiological and clinical problem; it is the leading cause of disability worldwide (1). Its nature is commonly recurrent and causes reduction in physical activity (2) and work ability (3). Societal groups associated with high levels of physical activity are indeed not spared musculoskeletal problems, and this includes highly trained military units. In fact, approximately 40% of Swedish Armed Forces (SwAF) marines on active duty experience LBP within a six-month period, and about half of these experience related limitations in work ability (4). This indicates that LBP could have a severe impact on the SwAF marines' operational readiness, as is seen internationally in marine units (5), which warrants preventive actions. Given the recurrent nature of LBP (6), preventive measures are a high priority and are believed to be most effective early in a marine's career. While the occurrence of and risk factors for musculoskeletal disorders in initial basic military training have been investigated (7, 8), the subsequent early phases of a marine's career have received less scientific attention; thus the need exists to address this gap in knowledge regarding risks for LBP in active-duty marines.

A high occurrence of musculoskeletal disorders is considered to be present by the SwAF occupational health personnel even during the four-month SwAF marine training course, where soldiers that have completed basic training are given their first marine-specific training. This physically demanding course focuses on marine-specific occupational tasks, including long range foot patrols with heavy equipment and assault operations from combat crafts (high-speed boats). Given the nature of this first and mandatory part of a marine's career, preventive measures at this stage could have a significant effect on the occurrence of future LBP in this group, and this has long been named a priority research topic in many military nations. Results gained from prospective studies in such communities, where occupational load and tasks are homogeneous and well known, have – we believe – great potential to fill knowledge gaps for further actions in defined military units.

Notably, medical examinations, health appraisals, and the evaluation of physical performance are basic routine procedures at the start of a military training course or before deployments. Information from such early examinations along with known risks from civilian contexts, such as a history of previous pain episodes (9, 10), physiological distress, or lifestyle factors (10, 11), has the potential to provide relevant risk information in operating activities. While low physical capacity and low performance on military physical fitness tests have previously been indicated as risks for LBP (12, 13), the screening of marines or similar elite units before entering the course with valid tests for their occupational exposures is not presently performed. New physical screening protocols have indeed been developed and introduced for other SwAF units, covering areas possibly related to the development of LBP in marines as well, for example lifting- and load-carrying capacities (14).

In addition, objective monitoring of occupational physical activity during the marine training course will aid in the interpretation of identified risks – such objective data has also been warranted for a long time. This study therefore aimed to prospectively evaluate the occurrence of LBP and its effect on work ability, as well as to identify potential early risks for such

1  
2  
3 disorders in soldiers during the marine training course. Further aims were to quantify  
4 occupational physical activity and work-related exposure during the course.  
5  
6  
7  
8

## 9 10 **Methods**

### 11 12 **Study design**

13  
14 This study used a prospective observational design with a cohort of SwAF marines entering  
15 the four-month marine training course. A screening program consisting of a self-administered  
16 questionnaire and a battery of physical tests was conducted at the start of the course, while  
17 pain occurrences were then followed up on a weekly basis. Occupational physical activity was  
18 continuously monitored with accelerometers worn during working hours for seven weeks of  
19 the course by a sub-cohort of participants; this was supplemented by platoon and individual  
20 logs of work tasks and physical training. All data collection was conducted at the 1st Marine  
21 Regiment, Stockholm, Sweden, between January and May, 2015. The study was approved in  
22 advance by the Regional Medical Research Ethics Committee, Stockholm (2014/1904-31/2).  
23 After receiving written and oral information on the study, signed informed consent was  
24 obtained from all participants prior to enrolment. Measurement occasions and the focus of the  
25 different phases of the course are illustrated in Figure 1, along with information on the  
26 participants' progression throughout the study.  
27  
28  
29  
30  
31

32 *Figure 1. about here*  
33

### 34 35 **Patient involvement**

36 Given the defined target group in the present study, no patients seeking medical care were  
37 recruited. The present research questions and outcomes are based on data/conclusions from  
38 our on-going translational research on active duty marines (4, 15); it is also influenced by our  
39 empirical knowledge and clinical work in this population. The Marines' medical and  
40 occupational health services have taken part in planning the data collection, and they  
41 constitute the primary way of implementing the results in clinical work for the studied  
42 population.  
43  
44  
45  
46  
47  
48

### 49 50 **Participants**

51 To be eligible for inclusion in the present study, marines had to have the intention to complete  
52 the entire marine training course. Of 56 eligible marines, 53 met the criterion, and were  
53 enrolled in the study. The mean (SD) age, body weight, height, and body mass index for the  
54 enrolled marines were: 21.8 (3.4) years, 80.0 (10.1) kg, 1.82 (0.07) m and 24.1 (2.5) kg/m<sup>2</sup>,  
55 respectively. The majority of participants (91%, n=48) were men. Ten (19%) had experienced  
56 pain in the lower back within six months prior to baseline. Marines with on-going LBP at  
57 baseline lasting for five or more consecutive weeks adjacent to the course start (n=1) were  
58 excluded from analysis based on incidences.  
59  
60

## Measurements and Procedure

### *Baseline questionnaires*

Participants initially completed confidential questionnaires to elicit military and demographic background information (4), general health (16) and mental health (17), self-assessed work ability (16), and physical training habits. The questions, which are described in detail in Table 1, have previously been used in international and Swedish public health cohorts and studies of active duty SwAF marines. The questionnaires also included detailed information on musculoskeletal pain for nine anatomical areas (18) within the past week and six months, with the following reporting options: For pain within the past week “No pain” or “Pain” and for pain within the past six months “No pain”, “Pain a couple a days per month or less”, or “Pain a couple of days per week or more”. Pain limiting work ability was assessed using the options “Not limited”, “Limited to some extent”, or “Limited to a large extent”.

*Table 1 about here*

### *Physical baseline tests*

Physical tests focusing on muscle strength and movement control were performed during the first ten days of the course. These tests, described in detail in Table 2, were selected on the basis of their use in clinical/preventive work among the studied population or in screening programs within the SwAF, and have previously been found reliable for use with active duty SwAF marines(23) or similar SwAF units (14). The strength tests, which were conducted following standardised SwAF instructions (14), were:

- *Kettlebell lifts* - The number of (correct) lifts of a pair of kettlebells (2 x 16, 24, or 32 kg) completed in a one-minute interval (14) and,
- *Pull-ups* - The number of (correct) pull-ups completed, performed hanging from a bar with an overhand (pronated) grip (14).

These tests were conducted within a series that also including a loaded lower limb functional test (24) (performed before these tests) and the ranger (loaded) step test (25) (performed after these tests), which are described in detail elsewhere (24, 25).

The two movement control tests were derived from the descriptions by Comerford and Mottram (26) and tested for good reliability in SwAF marines (23). These tests focus on the ability to actively control or prevent compensatory movement in the lumbar spine, i.e. flexion, extension or rotation, while actively moving the lower extremities. The tests, conducted following standardised instructions, (23) were:

- *Double Leg Lift & Lower (DLL&L)*: The subject, from a supine position, lifts both feet off the bench to a 90° hip flexion, and then lowers them back to the bench. Any uncontrolled movements in flexion or extension were recorded in the test protocol.

- 1  
2  
3 - *Double Leg Lift & Alternate Leg Extension (DLL&ALE)*: The subject, from a supine  
4 position, lifts both feet off the bench to a 90° hip flexion, then lowers and straightens  
5 one leg to a fully extended position and then back to a 90° hip flexion. The procedure  
6 was then repeated with the other leg, after which both legs were lowered to the starting  
7 position. The direction of any uncontrolled movements in extension, flexion, or  
8 rotation was recorded in the test protocol.  
9  
10

11  
12 *Table 2. about here*  
13  
14  
15

### 16 *Continuous assessment of work-related physical activity and occupational tasks*

17  
18 Twenty-seven marines from the inception cohort were randomly assigned by a computer-  
19 generated algorithm to wear accelerometers during the course. Six declined, leaving 21  
20 marines in this sub-cohort. They were fitted with tri-axial accelerometers (GT3X+BT,  
21 Actigraph, Pensacola, FL) and instructed to wear them on the left hip during all working  
22 hours of the course, with the exception of planned prolonged loaded marches (due to the risk  
23 of interaction with back pack hip belts resulting in abrasions or compression injuries), aquatic  
24 physical training, or during training conducted at the marine combat obstacle course (due to  
25 water obstacles). They were also instructed to remove them during field exercises conducted  
26 at other bases during weeks 11-13 of the course due to an inability to collect data at these  
27 locations. The accelerometers were initialised using ActiLife software (version 5.5), with data  
28 sampling set at a rate of 30Hz. Information on occupational tasks and equipment worn, and  
29 physical training sessions conducted, was recovered from detailed weekly schedules  
30 completed by the instructing officers, as well as from the self-reported diaries kept by the  
31 marines.  
32  
33  
34  
35  
36  
37  
38  
39

### 40 *Weekly follow-up*

41  
42 Incidence of musculoskeletal disorders and related effect on work ability were self-reported  
43 weekly during the course, using a short version of the baseline questionnaire. The number of  
44 responders for each week is illustrated in Figure 1. Weekly follow-ups were not strictly  
45 possible due to the geographic location of training during course week 12, so the follow up  
46 was conducted at the beginning of week 13 and reported as week 12.5 (i.e. week 12 and half  
47 of week 13).  
48  
49  
50  
51  
52

### 53 **Outcomes**

54  
55 LBP was defined as the occurrence of any self-rated pain in the lower back (from the twelfth  
56 ribs to the lower gluteal folds (27) within the preceding week, as reported during the weekly  
57 follow-up. LBP limiting work ability was defined as the occurrence of any self-rated pain in  
58 the lower back within the preceding week that had limited work ability.  
59  
60

1  
2  
3 For incidence proportions, rates, and regression analysis (described in detail below), marines  
4 were considered to be at risk for an event as long as they were under observation, and until  
5 the occurrence of a LBP event. At the time of pain occurrence, the risk interval was  
6 discontinued and marines were not considered to be at risk for a new episode until they were  
7 pain free for the next coming week (if reporting no pain in that week, it was counted, if  
8 reporting pain also that week, the week remained censored). Meeting this requirement  
9 automatically allowed them to re-enter the analysis (pain observation period). Marines with  
10 on-going LBP at baseline were not considered at risk until they were pain free for at least one  
11 week, at which point in time they entered the analysis. Late entry was only allowed during the  
12 first four weeks to accurately reflect the independent variables collected at baseline.  
13  
14  
15  
16  
17  
18

### 19 **Independent variables**

20  
21 Independent variables analysed as potential risk factors for LBP and LBP limiting work  
22 ability were selected based on existing evidence from active-duty SwAF marines, other  
23 military and civilian populations, and empirical knowledge from clinical work with the SwAF  
24 marines. These 17 variables, including two physical characteristics, four health-related, two  
25 work-related, three on physical training habits, and the results of the two strength and the two  
26 movement control tests (in flexion and extension), are described in detail in Table 1 and 2.  
27  
28  
29  
30  
31

### 32 **Confounding variables**

33 *Age, BMI, sex, smoking, non-musculoskeletal co-morbidity, and LBP previously during the*  
34 *course* were a priori considered possible confounders. A confounder was defined as a variable  
35 that, when included during the analytic process, changed the hazard ratio of the crude  
36 regression model >20% (28).  
37  
38  
39  
40  
41

### 42 **Data management and statistics**

#### 43 **Missing data**

44 The dependent variables, i.e. LBP and LBP limiting work ability, were missing for 11% of the  
45 data due to subjects' lost to follow-up during the course. Also, of the independent variables,  
46 the kettlebell lift tests were missing for 30%, the pull-ups 23%, and the DLL-ALE test 4%,  
47 due to participants not being able (or allowed) to perform the test at baseline (illness such as  
48 having a cold or other infection in 44% of these and pain or similar co-morbidity in 56%). All  
49 female marines (n=5) missed the kettlebells lift and the pull-ups tests due to illness or on-  
50 going pain. Based on the analysis of the missing data mechanism (29), however, the data for  
51 outcomes and the DLL-ALE test were considered to be "missing completely at random" (i.e.  
52 the reason for data to be missing was not dependent of the missing data itself nor predicted by  
53 the independent variables included the analysis) and missing data on the kettlebell lift and the  
54 pull-ups tests to be "covariate missing completely at random" (missing data predicted by  
55 bodyweight and body height). Multiple imputations by Markov chain Monte Carlo, with  
56  
57  
58  
59  
60

1  
2  
3 random draws based on Jeffreys prior distribution, were used to generate 50 imputed datasets  
4 with completed data on all predictor variables, on which the pooled analyses were based (30).  
5 Given that no female marines performed the two strength tests, imputing values for females  
6 based on data from only male marines on these tests might affect the accuracy of the  
7 imputation. Therefore, regressions including these two tests were repeated, as part of the  
8 sensitivity analysis, on only complete cases, as well as on multiple imputed data with females  
9 excluded.  
10  
11  
12

## 13 Descriptive statistics

### 14 *LBP and LBP limiting work-ability*

15 Weekly prevalence was analysed as a percentage of those under observation, with 95% CI  
16 (31). Weekly incidence of LBP and LBP limiting work ability was analysed as a percentage  
17 of those at risk, with a 95% CI (31). The incidence rate of LBP and LBP limiting work ability  
18 during the course was calculated based on the number of episodes and the time at risk,  
19 presented as episodes per 1000 person-days, with a corresponding 95% CI (32).  
20  
21  
22

### 23 *Work-related physical activity and occupational tasks*

24 Accelerometer data were analysed only if sufficient wear time could be established, which  
25 was defined as at least 180 minutes of wear time per day (for full work days) on at least three  
26 workdays (for a five-day week). Non-wear time within days was identified by algorithms  
27 suggested by Choi (33). For valid wear-time, vertical counts per minute (cpm; where the  
28 arbitrary unit of counts is the filtered raw acceleration generated by body movements and  
29 captured by the accelerometer) - based on 10-second epochs - were extracted and reported as  
30 minutes and percentage of total work time, and work time per week spent in these predefined  
31 categories: 0-99; 100-2019; 2020-5998; and 5999- cpm (34). Here, the category of 2020-5998  
32 cpm was considered to be comparable to slow to brisk walking (~3.8-7.5 km/h) (35, 36). In  
33 addition, the percentage of the workday spent in these categories was reported for time with  
34 and without load carriage (combat equipment,  $\geq 17.5$  Kg), as identified from the detailed  
35 schedules (verified against activity logs). Evaluation and comparison with work schedules  
36 were performed visually.  
37  
38  
39  
40  
41  
42  
43  
44

## 45 Regression analysis

46 We used the Andersen-Gill repeated time-to-event regression method (37, 38) with the robust  
47 sandwich variance estimator (39), and discontinuous risk intervals (38), as defined above, to  
48 examine the predictive association between the independent variables and LBP. The results  
49 are reported as hazard ratios (HR) with a corresponding 95% CI. Secondly, this method was  
50 applied to examine the predictive association between independent variables and LBP  
51 limiting work ability.  
52  
53  
54

55 Independent variables were analysed in two blocks. First, *physical characteristics, work- and*  
56 *health-related* variables, as identified with univariate time-to-event regressions to be  
57 associated with the dependent variable, at the level of  $p < 0.20$ , were included in a  
58 multivariable time-to-event regression model. This was followed by an iterative, purposeful  
59  
60



1  
2  
3 selection process of deleting non-significant variables at  $p > 0.05$ . The model was then refitted  
4 and verified until a final model contained only significant ( $p < 0.05$ ) independent variables,  
5 identified confounders, and significant ( $p < 0.05$ ) interactions (between independent variables  
6 in the final model and/or independent variables and confounders) (28). This process was  
7 repeated for the *clinical tests*, with the addition of the significant *physical characteristics*,  
8 *work- and health-related* risk factors addressed as additional potential confounders. Due to  
9 the relatively small sample size, the confidence interval for borderline significant independent  
10 variables were inspected for incorrect omission from final models (40). All final models were  
11 deemed to have sufficient confidence interval coverage, based on the events-per-variable ratio  
12 (40). Using methods described by Cleves et al. (41), final models showed no violations of  
13 underlying assumptions of proportional hazards (e.g. tests based on reestimation, interaction  
14 of analysis time with the independent variables and graphically through Schoenfeld residuals)  
15 and showed appropriate model fit. Analysis was performed using STATA Statistical software  
16 (version 13.1; College Station, TX).  
17  
18  
19  
20  
21  
22  
23  
24

## 25 Results

26  
27 Table 3 presents demographic and background data as well as self-rated general health for the  
28 53 marines who completed the baseline questionnaire (96% response rate). Good or excellent  
29 current health status was reported by  $>95\%$  of respondents. Of the 53 marines starting the  
30 course, 49% joined directly from basic military training, while the other 51% came from  
31 previous service in the SwAF or from a period of civilian occupation/studies.  
32  
33  
34  
35  
36

### 37 LBP and LBP limiting work-ability

38 Figures 2 and 3 present the prevalence and incidence of LBP and LBP limiting work ability,  
39 expressed per week during the marine training course. A total of 68% of the marines  
40 experienced at least one episode of LBP during the course, of whom 57% reported related  
41 limitations in their ability to work. The average LBP episode consisted of 1.6 weeks of  
42 reported pain, with 42% of the sufferers experiencing at least one recurrent episode (with an  
43 average of 2.8 weeks without reporting pain between episodes). This gave an LBP incidence  
44 rate of 13.5 (95% CI 10.4 to 17.8) episodes per 1000 person-days. For LBP limiting work  
45 ability the corresponding incidence rate was 6.3 (95% CI 4.2 to 10.0). For comparison,  
46 incidence rates based on time to first event (during the course) are presented in supplementary  
47 Table 1.  
48  
49  
50  
51

52 *Fig. 2 and 3 about here.*

### 54 Risk factors for LBP and LBP limiting work ability

#### 55 *Individual physical characteristics, work- and health-related risk factors*

56 Tables 4 and 5 present the results from univariate, final unadjusted and final adjusted  
57 multivariable recurrent-event regression models for LBP and LBP limiting work ability  
58 during the course. *Back pain (lumbar and/or thoracic back pain)* within six months prior to  
59  
60

1  
2  
3 the MTC and *shorter body height* ( $\leq 1.80\text{m}$ ), adjusted for the confounding effect of *sex* (LBP  
4 and LBP limiting work ability) and *previous neck shoulder pain* (LBP limiting work ability),  
5 were identified as independent risks. Additionally, *less than three sessions per week of*  
6 *physical training* was a significant risk for LBP that limited work ability. No interactions  
7 between the independent variables, nor with the confounders, emerged as significant in any of  
8 the models. Inspecting the 95% CI of excluded variables did not indicate any non-correct  
9 exclusion of potential risk factors. For comparison, initial multiple models for LBP and LBP  
10 limiting work ability are presented with 95% CI in supplementary Table 2.  
11  
12  
13  
14  
15  
16

17 *Tables 4 and 5 about here.*

### 18 **Clinical tests**

19  
20 Performing fewer than four pull-ups (HR 1.9, 95% CI 1.2–3.0), adjusted for confounding  
21 effect of *previous BP* and *body height*, was identified as a significant risk for LBP. However,  
22 no clinical tests were associated with LBP limiting work ability at  $p < 0.05$ . Final unadjusted  
23 and adjusted models for LBP limiting work ability are presented in Supplementary Tables 3  
24 and 4. Sensitivity analysis based on complete cases and imputed data, with only males, caused  
25 only marginal changes in the results, with no effect on inference.  
26  
27  
28

### 29 **Work-related physical activity and occupational tasks**

30  
31 Of the seven weeks of measurement, five contained sufficient wear time that could be fully  
32 used for analyses. During these weeks, an average of 16% of the working time (73 minutes  
33 per day) (not including long-distance march training, combat obstacle course or aquatic  
34 training, with a weekly average of additionally 2 hrs), was spent in physical activity of at least  
35 moderate intensity, i.e. 2020–5998 cpm, or slow-to-brisk walking ( $\sim 3.8\text{--}7.5\text{ km/h}$ ). On  
36 average, four percent of total working time was spent in physical activity of at least vigorous  
37 intensity, i.e.  $>5998\text{ cpm}$ . Sixty-one percent (44 min. per day) of the time spent in activities  
38 generating  $>2020\text{ cpm}$  was conducted wearing combat equipment ( $\geq 17.5\text{ kg}$ ), as illustrated in  
39 Figure 4. There was, however, a large variation across weeks in work-time wearing combat  
40 equipment that spanned from 4% to 94%, as exemplified in Figure 5.  
41  
42  
43  
44  
45  
46

## 47 **Discussion**

48  
49 This prospective cohort study among Swedish marines showed a high occurrence of LBP and  
50 consequent limitations in work ability while participating in their basic training marine-  
51 course. Marines with a history of previous back pain, shorter body height, or poor  
52 performance in the pull-up test were twice as likely to experience a new episode of LBP  
53 during this four-month period of physically demanding marine tasks.  
54  
55

56  
57 This study followed 95% ( $n=53$ ) of the participants enrolled in a typical marine training  
58 course in the Swedish Armed Forces (SwAF). Our cohort was homogeneous with regard to  
59 demographic characteristics and occupational tasks, which is similar to previous studies of  
60

1  
2  
3 marines (4), and may be regarded as a representative military-marine sample. While the  
4 sample size constituted the majority of the eligible Swedish marine trainees, caution has been  
5 taken to avoid over-fitting of statistical models. The effect of the relative small sample size on  
6 precisions of the estimate was here reflected in the somewhat wide confidence intervals.  
7 Furthermore, given the heightened risk of non-identification of a true risk factor, omission of  
8 borderline significant risks, i.e. not reaching significance in the present study, should not  
9 exclude them for further investigation in other similar cohorts in the military community. The  
10 loss of power could have been avoided by including data from future training courses (i.e.  
11 accumulating a larger sample), other military courses, or by prolonging the follow up period  
12 (i.e. including time after the course) (42). For the present study's aims, however, we believe it  
13 was more important to emphasize sample homogeneity and specific work-related exposure, as  
14 we believe this to be one of the most challenging factors to control for in studies of military  
15 populations.  
16  
17  
18  
19  
20

21 We believe this study to be the first to use a repeated time-to-event regression method, with  
22 discontinued risk intervals, for LBP in a military population. This method may – we believe –  
23 better reflect the recurrent nature of LBP and make more use of the collected data than the  
24 conversional methods using time-to-first event. The definitions of a new event vary between  
25 studies (43), but a pain-free period of one week was considered sufficient for an additional  
26 event to be defined as either a new event or symptom “flare up” (44) from a previous event.  
27 Given that this definition does not distinguish between a new “uniquely” first event or  
28 symptom “flare up” from a recurrent chain of events, potential differences in the mechanism  
29 for new and recurrent pain could not be further disentangled in this study. Regarding our  
30 baseline testing, marines that were injured (n=9) or ill (n=7) were not allowed to perform the  
31 “max effort” tests, because of the risk of worsening their health. However, analysis based on  
32 complete cases, as well as on imputations including only males, did not change the results,  
33 indicating an appropriate inference from the present results. Due to none of the female  
34 marines conducting the two “max” tests of pull-ups or kettle-bell lifts, these results should  
35 only be extended to males.  
36  
37  
38  
39  
40  
41

42 Our results show a relatively high incidence of LBP in this cohort of young marines, with  
43 more than two thirds experiencing at least one LBP episode during the course. This is almost  
44 twice the reported six-month LBP prevalence for active duty SwAF marines (4), more than  
45 twice the LBP incidence in the British combat infantryman's course (45), and higher than the  
46 total musculoskeletal injury incidence in other military training cohorts (46-48). This  
47 difference in pain occurrence may partly be explained by differences in the length of follow-  
48 up periods (49), or how LBP was defined (50). However, the recall period in this study was  
49 relatively short, and as such should limit the risk of recall bias. Given that three of five  
50 marines experiencing LBP also reported related limitations in work ability, it is likely that  
51 LBP reduced the intended goals with the course, and this may have future negative effects on  
52 the operational readiness of SwAF marine units.  
53  
54  
55  
56  
57  
58  
59  
60

1  
2  
3 Although previous musculoskeletal disorders are considered to be the strongest predictor for  
4 new musculoskeletal disorders in military populations (15, 47, 51, 52), it is not clear if such  
5 previous pain-episodes are anatomically region-specific in their prediction. This might not  
6 make a substantial difference in general primary prevention policy decisions, but the present  
7 findings could – we believe – help clinicians to be more specific in their selection of suitable  
8 secondary preventive measures for LBP. However, until the pathophysiological pathways  
9 between prior and future pain episodes are further disentangled, this does not inform the  
10 clinician what specific deficiencies to address. As such, the current use is limited to  
11 identifying persons at risk of LBP (53); marines at risk should be considered for further  
12 clinical examination and secondary preventive action. The same goes for marines with a body  
13 height of  $\leq 1.80\text{m}$ , here identified as a risk for both LBP and LBP limiting work ability. While  
14 risks associated with body height are in line with our previous results (4), it is not likely that a  
15 short body height per se constitutes the actual risk, it could potentially represent an interaction  
16 with equipment worn or specific work tasks conducted.  
17  
18  
19  
20  
21

22 The present results also highlight the need for regular physical training ( $\geq 3$  sessions/week)  
23 for military personnel planning to attend the marine training course. This is in line with  
24 recommendations for general health in the civilian population (54), and should certainly be  
25 stressed for this physically active military community as well. Here, inferior upper-body  
26 strength, as tested by the pull-up test, seems to have played a role in back pain aetiology. This  
27 test, used in different forms in many military physical assessments (14, 55), is considered a  
28 relevant test of the ability to navigate over obstacles (14), but also as a proxy for general  
29 upper-body strength and muscle endurance (56). The test primarily challenges the back,  
30 shoulder and arm muscles, but also to a moderate extent the external oblique and erector  
31 spinae muscles (57). As such, it could represent a valid test for marines as upper body  
32 strength is crucial for load carriage (58). No female marines conducted these tests, therefore  
33 future cut-offs need to be validated for them. Neither the kettlebell lifts nor any of the  
34 movement-control tests predicted future LBP, however, “core-strengthening exercises” were  
35 already conducted as part of the marines’ daily calisthenics in this sample, potentially  
36 preventing such deficits early in the course. Still, the results tally with our previously reported  
37 results from active duty marines, where these tests, analysed as overall pass/fail, failed to  
38 predict back pain within a six- and 12-month event window (15). While the present study  
39 aimed at identifying early risks for LBP, the sample size limited the exploration of potential  
40 effect measures modification in the final models to two-way statistical interactions. These  
41 analyses did, however, not provide any evidence of previous back pain affecting the amount  
42 of physical training and upper body strength in relation to a new back pain episode. The  
43 direction of temporality could however only be addressed for the six months preceding the  
44 course start. Still, physical training is recommended as primary (59-64), secondary (59, 60,  
45 62, 64), and tertiary (59-64) preventive actions for back pain in both general populations and  
46 occupational settings. This highlights the potential role of physical training as a preventive  
47 action against future back pain episodes for marines displaying these identified risks.  
48  
49  
50  
51  
52  
53  
54  
55  
56  
57  
58  
59  
60

1  
2  
3 While the physical demands of the course could be one reason for high LBP incidence, more  
4 than eighty percent of the work time measured was spent at low levels of ambulation, i.e.  
5 producing less than 2020 cpm. These results were similar to, or lower than, ambulatory  
6 movements reported for basic military training courses (65-67). However, in comparison with  
7 the US basic military training, where loads of no more than 4.5 kg were carried for 80% of the  
8 time (65), the marines in the present study carried combat equipment weighing >17.5 kg for  
9 more than half of the measured work time. In addition, the maximum weight of equipment  
10 worn on certain occasions, such as during loaded marches, can at times be more than twice  
11 that. Considering that both body-worn equipment and load carriage has been linked to LBP in  
12 deployed military personnel (12), this may possibly relate to the high LBP incidence in the  
13 present study. Furthermore, it highlights the need to consider load carriage when examining  
14 the association between ambulatory movement and LBP in the military context.  
15  
16  
17  
18  
19  
20  
21

22 In summary, LBP and related limitations in work ability are common during the four-month  
23 physically demanding marine training course, and may affect the future operational readiness  
24 of marine units. Since previous LBP episodes are the most consistent risk for further LBP,  
25 marines entering the course with a history of LBP should receive tailor-made secondary  
26 preventive actions. Furthermore, marines with few weekly sessions of physical training, or  
27 with insufficient upper body strength, should be considered for targeted physical training.  
28 Further investigation on the role of body height on LBP is needed, including its relation to  
29 body-worn equipment, before it can be effectively used in LBP prevention. In addition, while  
30 ambulation was low for parts of the course, combat equipment was carried for more than half  
31 of the work time, further indicating the need to consider the role of body-worn equipment in  
32 LBP aetiology for this population.  
33  
34  
35  
36  
37  
38  
39  
40  
41  
42

## 43 **Acknowledgements**

44 Funding from the Swedish Armed Forces PhD program and financial support from the  
45 Swedish Society for Military Medical Officers, Ann-Marie och Ragnar Hemborgs  
46 Minnesfond and Land-och Sjöfonden is gratefully acknowledged. In addition, we would like  
47 to thank the 1st Marine Regiment of the Swedish Armed Forces for overall support. The  
48 authors would also like to thank Jacob Sejersen and Kjell Norman for valuable support during  
49 design of the study and during data collection.  
50  
51  
52  
53  
54  
55

## 56 **Contributorship statement**

57 AM was the main writer of the paper and participated in the conception and design of the  
58 study, and acquired, analysed and interpreted the data. HL and HN participated in the  
59  
60

1  
2  
3 conception and design of the study, planning of the analysis, interpretation of the data as well  
4 as the writing and revising of the paper. MD was involved in the design and planning of the  
5 study, as well as interpreting the data and revising the paper. As senior project researcher,  
6 BOÅ participated in the conception and design of the study, planning the analysis and  
7 interpretation of the data, and writing and revising the paper. All the authors have read and  
8 approved the final manuscript.  
9  
10  
11  
12  
13

## 14 **Competing interests**

16 Dr. Monnier reports grants from The Swedish Society for Military Medical Officers, grants  
17 from Ann-Mari och Ragnar Hemborgs Minnesfond, grants from Stiftelsen fond till minne av  
18 ömsesidiga Olycksfallsförsäkringsbolaget Land och Sjö, during the conduct of the study; Dr.  
19 Larsson has nothing to disclose. Dr. Nero has nothing to disclose. Dr. Djupsjöbacka has  
20 nothing to disclose. Dr. Äng has nothing to disclose.  
21  
22  
23  
24  
25  
26

## 27 **Funding**

29 Funding was received from the Swedish Armed Forces PhD program, the Swedish Society for  
30 Military Medical Officers, Ann-Marie och Ragnar Hemborgs Minnesfond and Land-och  
31 Sjöfonden. The funding organisations had no authority over or input into any part of the  
32 study.  
33  
34  
35  
36  
37

## 38 **Data sharing statement**

39 No additional data are available.  
40  
41  
42  
43  
44  
45  
46  
47  
48  
49  
50  
51  
52  
53  
54  
55  
56  
57  
58  
59  
60

## References

1. Global, regional, and national incidence, prevalence, and years lived with disability for 301 acute and chronic diseases and injuries in 188 countries, 1990-2013: a systematic analysis for the Global Burden of Disease Study 2013. *Lancet*. 2015;386(9995):743-800.
2. Hoy D, Bain C, Williams G, March L, Brooks P, Blyth F, et al. A systematic review of the global prevalence of low back pain. *Arthritis Rheum*. 2012;64(6):2028-37.
3. Katz JN. Lumbar disc disorders and low-back pain: socioeconomic factors and consequences. *J Bone Joint Surg Am*. 2006;88(suppl 2):21-4.
4. Monnier A, Larsson H, Djupsjöbacka M, Brodin L-Å, Äng BO. Musculoskeletal pain and limitations in work ability in Swedish marines: a cross-sectional survey of prevalence and associated factors. *BMJ Open*. 2015;5(10):e007943.
5. Hayton J. Reducing medical downgrading in a high readiness Royal Marine unit. *JR Army Med Corps*. 2004;150:164-7.
6. Pengel LH, Herbert RD, Maher CG, Refshauge KM. Acute low back pain: systematic review of its prognosis. *BMJ*. 2003;327(7410):323.
7. O'Connor F. Injuries during Marine Corps officer basic training. *Mil Med*. 2000;165(7):515.
8. Trone DW, Cipriani DJ, Raman R, Wingard DL, Shaffer RA, Macera CA. Self-Reported Smoking and Musculoskeletal Overuse Injury Among Male and Female US Marine Corps Recruits. *Mil Med*. 2014;179(7):735-43.
9. Papageorgiou AC, Croft PR, Thomas E, Ferry S, Jayson M, Silman AJ. Influence of previous pain experience on the episode incidence of low back pain: results from the South Manchester Back Pain Study. *Pain*. 1996;66(2):181-5.
10. Adams MA, Mannion AF, Dolan P. Personal risk factors for first-time low back pain. *Spine*. 1999;24(23):2497.
11. Feyer A-M, Herbison P, Williamson AM, de Silva I, Mandryk J, Hendrie L, et al. The role of physical and psychological factors in occupational low back pain: a prospective cohort study. *Occup Environ Med*. 2000;57(2):116-20.
12. Roy TC, Lopez HP, Piva SR. Loads worn by soldiers predict episodes of low back pain during deployment to Afghanistan. *Spine*. 2013;38(15):1310-7.
13. Taanila H. Musculoskeletal disorders in male Finnish conscripts: Importance of physical fitness as a risk factor, and effectiveness of neuromuscular exercise and counseling in the prevention of acute injuries, and low back pain and disability. (Doctoral dissertation, University of Tampere, School of Medicine, UKK Institute, Centre for Military Medicine Finland, 2013). Retrieved from <http://urn.fi/URN:ISBN:978-951-44-9069-9>
14. Larsson H, Tegern M, Monnier A, Skoglund J, Helander C, Persson E, et al. Content Validity Index and Intra- and Inter-Rater Reliability of a New Muscle Strength/Endurance Test Battery for Swedish Soldiers. *PloS one*. 2015;10(7):e0132185.
15. Monnier A, Djupsjöbacka M, Larsson H, Norman K, Äng BO. Risk factors for back pain in marines; a prospective cohort study. *BMC Musculoskelet Disord*. 2016;17(1):319.
16. Ilmarinen J. The work ability index (WAI). *Occup Med*. 2007;57(2):160-.
17. Goldberg DP, Gater R, Sartorius N, Ustun T, Piccinelli M, Gureje O, et al. The validity of two versions of the GHQ in the WHO study of mental illness in general health care. *Psychol Med*. 1997;27(01):191-7.
18. Kuorinka I, Jonsson B, Kilbom A, Vinterberg H, Biering-Sørensen F, Andersson G, et al. Standardised Nordic questionnaires for the analysis of musculoskeletal symptoms. *Appl Ergon*. 1987;18(3):233-7.

19. DP Goldberg, P Williams. *A User's Guide to the General Health Questionnaire*. 3ed, 1988. NFER, London, UK.
20. Makowska Z, Merecz D, Moscicka A, Kolasa W. The validity of general health questionnaires, GHQ-12 and GHQ-28, in mental health studies of working people. *Int J Occup Med Environ Health*. 2002;15(4):353-62.
21. Fredriksson K, Alfredsson L, Ahlberg G, Josephson M, Kilbom Å, Wigaeus Hjelm E, et al. Work environment and neck and shoulder pain: the influence of exposure time. Results from a population based case-control study. *Occup Environ Med*. 2002;59(3):182-8.
22. Vingård E, Alfredsson L, Hagberg M, Kilbom Å, Theorell T, Waldenström M, et al. To What Extent Do Current and Past Physical and Psychosocial Occupational Factors Explain Care-Seeking for Low Back Pain in a Working Population?: Results from the Musculoskeletal Intervention Center-Norrköping Study. *Spine*. 2000;25(4):493-500.
23. Monnier A, Heuer J, Norman K, Äng BO. Inter-and intra-observer reliability of clinical movement-control tests for marines. *BMC Musculoskelet Disord*. 2012;13(1):263.
24. Larsson H, Larsson M, sterberg H, Harms-Ringdahl K. Screening Tests Detect Knee Pain and Predict Discharge from Military Service. *Mil Med*. 2008;173(3):259-65.
25. Larsson H, Harms-Ringdahl K. A lower-limb functional capacity test for enlistment into Swedish Armed Forces ranger units. *Mil Med*. 2006;171(11):1065-70.
26. Comerford MJ. *The Performance Matrix performance Profiling, risk assessment & training strategies for injury prevention & performance enhancement*. UK: KC International / Movement Performance Solutions; 2008.
27. Hoy D, March L, Brooks P, Woolf A, Blyth F, Vos T, et al. Measuring the global burden of low back pain. *Best Pract Res Clin Rheumatol*. 2010;24(2):155-65.
28. Hosmer DW, Lemeshow S, May S. *Applied Survival Analysis: Regression Modelling of Time to Event Data*. 2nd ed., 2008. Hoboken: John Wiley & Sons.
29. Vittinghoff E, Glidden D, Shiboski S, McCulloch C. *Regression methods in biostatistics: linear, logistic, survival, and repeated measures models*. 2005. New York: Springer.
30. Rubin DB. Multiple imputation after 18+ years. *J Am Stat Assoc*. 1996;91(434):473-89.
31. Brown LD, Cai TT, DasGupta A. Interval estimation for a binomial proportion. *Statist Sci*. 2001:101-17.
32. Miller RG. The jackknife-a review. *Biometrika*. 1974;61(1):1-15.
33. Choi L, Liu Z, Matthews CE, Buchowski MS. Validation of accelerometer wear and nonwear time classification algorithm. *Med Sci Sports Exerc*. 2011;43(2):357.
34. Troiano RP, Berrigan D, Dodd KW, Masse LC, Tilert T, McDowell M. Physical activity in the United States measured by accelerometer. *Med Sci Sports Exerc*. 2008;40(1):181.
35. Nichols JF, Morgan CG, Chabot LE, Sallis JF, Calfas KJ. Assessment of physical activity with the Computer Science and Applications, Inc., accelerometer: laboratory versus field validation. *Res Q Exerc Sport*. 2000;71(1):36-43.
36. Matthew CE. Calibration of accelerometer output for adults. *Med Sci Sports Exerc*. 2005;37(11 Suppl):S512-22.
37. Andersen PK, Gill RD. Cox's regression model for counting processes: a large sample study. *Ann Stat*. 1982:1100-20.
38. Guo Z, Gill TM, Allore HG. Modeling repeated time-to-event health conditions with discontinuous risk intervals: an example of a longitudinal study of functional disability among older persons. *Methods Inf Med*. 2008;47(2):107.



39. Lin DY, Wei L-J. The robust inference for the Cox proportional hazards model. *J Am Stat Assoc.* 1989;84(408):1074-8.
40. Vittinghoff E, McCulloch CE. Relaxing the rule of ten events per variable in logistic and Cox regression. *Am J Epidemiol.* 2007;165(6):710-8.
41. Cleves M, Gould W, Gutierrez R, Marchenko Y. An introduction to survival analysis using Stata.2010, 3ed ed., College Station: Stata press.
42. Ingel K, J, Jahn-Eimermacher A. Sample - size calculation and reestimation for a semiparametric analysis of recurrent event data taking robust standard errors into account. *Biom J.* 2014;56(4):631-48.
43. Stanton TR, Latimer J, Maher CG, Hancock MJ. How do we define the condition 'recurrent low back pain'? A systematic review. *Eur Spine J.* 2010;19(4):533-9.
44. Young AE, Wasiak R, Phillips L, Gross DP. Workers' perspectives on low back pain recurrence: "It comes and goes and comes and goes, but it's always there". *PAIN.* 2011;152(1):204-11.
45. Sharma J, Greeves JP, Byers M, Bennett AN, Spears IR. Musculoskeletal injuries in British Army recruits: a prospective study of diagnosis-specific incidence and rehabilitation times. *BMC Musculoskelet Disord.* 2015;16(1):1.
46. Taanila H, Suni JH, Kannus P, Pihlajamäki H, Ruohola J-P, Viskari J, et al. Risk factors of acute and overuse musculoskeletal injuries among young conscripts: a population-based cohort study. *BMC Musculoskelet Disord.* 2015;16(1):1.
47. Knapik JJ, Graham B, Cobbs J, Thompson D, Steelman R, Jones BH. A prospective investigation of injury incidence and injury risk factors among Army recruits in military police training. *BMC Musculoskelet Disord.* 2013;14(1):32.
48. Hollingsworth D. The prevalence and impact of musculoskeletal injuries during a pre-deployment workup cycle: survey of a Marine Corps special operations company. *J Spec Oper Med.* 2009;9(4):11.
49. Carragee EJ, Cohen SP. Lifetime Asymptomatic for Back Pain: The Validity of Self-report Measures in Soldiers. *Spine.* 2009;34(9):978-83.
50. Thiese MS, Hegmann KT, Wood EM, Garg A, Moore JS, Kapellusch J, et al. Prevalence of low back pain by anatomic location and intensity in an occupational population. *BMC Musculoskelet Disord.* 2014;15(1):1.
51. Mattila VM, Sahi T, Jormanainen V, Pihlajamäki H. Low back pain and its risk indicators: a survey of 7,040 Finnish male conscripts. *Eur Spine J.* 2008;17(1):64-9.
52. Knapik JJ, Graham B, Cobbs J, Thompson D, Steelman R, Jones BH. A prospective investigation of injury incidence and risk factors among army recruits in combat engineer training. *J Occup Med Toxicol.* 2013;8(1):5.
53. Leboeuf-Yde C. Back pain—individual and genetic factors. *J Electromyogr Kinesiol.* 2004;14(1):129-33.
54. Garber CE, Blissmer B, Deschenes MR, Franklin BA, Lamonte MJ, Lee I-M, et al. American College of Sports Medicine position stand. Quantity and quality of exercise for developing and maintaining cardiorespiratory, musculoskeletal, and neuromotor fitness in apparently healthy adults: guidance for prescribing exercise. *Med Sci Sports Exerc.* 2011;43(7):1334-59.
55. Headquarters Marine Corps. Marine Corps physical fitness test and body composition program manual. Washington, DC. (2002).
56. Vickers Jr RR. Construct Validity of Physical Fitness Tests. Naval Health Research Center, San Diego 2011. Report. No. 11-52.
57. Youdas JW, Amundson CL, Cicero KS, Hahn JJ, Harezlak DT, Hollman JH. Surface electromyographic activation patterns and elbow joint motion during a pull-up, chin-up, or perfect-pullup™ rotational exercise. *J Strength Cond Res.* 2010;24(12):3404-14.

- 1  
2  
3 58. Knapik JJ, Harman EA, Steelman RA, Graham BS. A systematic review of the  
4 effects of physical training on load carriage performance. *J Strength Cond Res.*  
5 2012;26(2):585-97.  
6  
7 59. Burton AK, Balagué F, Cardon G, Eriksen HR, Henrotin Y, Lahad A, et al.  
8 Chapter 2 European guidelines for prevention in low back pain. *Eur Spine J.* 2006;15:s136-  
9 s68.  
10 60. Burton AK. How to prevent low back pain. *Best Pract Res Clin Rheumatol.*  
11 2005;19(4):541-55.  
12 61. Bigos SJ, Holland J, Holland C, Webster JS, Battie M, Malmgren JA. High-  
13 quality controlled trials on preventing episodes of back problems: systematic literature review  
14 in working-age adults. *Spine J.* 2009;9(2):147-68.  
15 62. Schaafsma FG, Anema JR, van der Beek AJ. Back pain: prevention and  
16 management in the workplace. *Best Prac Res Clin Rheumatol.* 2015;29(3):483-94.  
17 63. Steffens D, Maher CG, Pereira LS, Stevens ML, Oliveira VC, Chapple M, et al.  
18 Prevention of low back pain: a systematic review and meta-analysis. *JAMA Intern med.*  
19 2016;176(2):199-208.  
20 64. Shiri R, Coggon D, Falah-Hassani K. Exercise for the prevention of low back  
21 pain: systematic review and meta-analysis of controlled trials. *Am J Epidemiol.*  
22 2017;187(5):1093-101.  
23 65. Simpson K, Redmond JE, Cohen BS, Hendrickson NR, Spiering BA, Steelman  
24 R, et al. Quantification of physical activity performed during US Army Basic Combat  
25 Training. *US Army Med Dep J.* 2013;4:55-65.  
26 66. Roos L, Boesch M, Sefidan S, Frey F, Mäder U, Annen H, et al. Adapted  
27 marching distances and physical training decrease recruits' injuries and attrition. *Mil Med.*  
28 2015;180(3):329-36.  
29 67. Wyss T, Roos L, Hofstetter M-C, Frey F, Mäder U. Impact of training patterns  
30 on injury incidences in 12 Swiss Army basic military training schools. *Mil Med.*  
31 2014;179(1):49-55.  
32  
33  
34  
35  
36  
37  
38  
39  
40  
41  
42  
43  
44  
45  
46  
47  
48  
49  
50  
51  
52  
53  
54  
55  
56  
57  
58  
59  
60

## Tables

**Table 1.** Self-reported independent variables, the form in which they were included in regression analysis, procedures for retrieving the data and rationale for categorisation.

| Independent variable                                   | Reference  | Exposure | Measurement procedure and variable management                                                                                                                                                                                                                                                                                                                                                                                                                                                                                   |
|--------------------------------------------------------|------------|----------|---------------------------------------------------------------------------------------------------------------------------------------------------------------------------------------------------------------------------------------------------------------------------------------------------------------------------------------------------------------------------------------------------------------------------------------------------------------------------------------------------------------------------------|
| <b>Physical characteristics</b>                        |            |          |                                                                                                                                                                                                                                                                                                                                                                                                                                                                                                                                 |
| Body weight                                            | Continuous |          | Body weight (in Kg) was self-reported and analysed as a continuous variable in the models.                                                                                                                                                                                                                                                                                                                                                                                                                                      |
| Body Height                                            | > 1.80m    | ≤1.80m   | Body height was self-reported. Based on the hypothesis that being either “too tall or too short” may be negative for musculoskeletal health in this environment, as previously identified for this population (4), <i>body height</i> was initially categorised as ≤1.80m, 1.81-1.85m ( <i>reference</i> ) and ≥1.86m (representing body height tertiles of the SwAF marine population, (4, 15), but was reduced to a dichotomised variable due to no difference between the upper and the reference category being identified. |
| <b>Rated health/health history</b>                     |            |          |                                                                                                                                                                                                                                                                                                                                                                                                                                                                                                                                 |
| Back Pain; within 6 mo. prior to course start          | No         | Yes      | Self-reported musculoskeletal pain in the lower and/or thoracic back , defined as “ <i>Pain a couple of days per month or less</i> ” or “ <i>Pain a couple of days per week or more</i> ” within the past six months, analysed dichotomised as <i>yes</i> or <i>no</i> as previously for this population (4, 15).                                                                                                                                                                                                               |
| Hip/Knee Pain; within 6 mo. prior to course start      | No         | Yes      | Self-reported occurrence of musculoskeletal pain in the <i>hip</i> and/or <i>knee</i> , defined as “ <i>Pain a couple of days per month or less</i> ” or “ <i>Pain a couple of days per week or more</i> ” within the past six months, analysed dichotomised as <i>yes</i> or <i>no</i> , as previously for this population.                                                                                                                                                                                                    |
| Neck/Shoulder Pain; within 6 mo. prior to course start | No         | Yes      | Self-reported musculoskeletal pain in the <i>neck</i> and/or <i>shoulder</i> , defined as “ <i>Pain a couple of days per month or less</i> ” or “ <i>Pain a couple of days per week or more</i> ” within the past six months, analysed dichotomised as <i>yes</i> or <i>no</i> , as previously in this population.                                                                                                                                                                                                              |

1  
2  
3  
4 Mental distress <4 ≥4  
5 (GHQ-12 Score)  
6  
7  
8 The level of mental distress was captured by the General Health Questionnaire-12 (19), a  
9 widely used screening instrument developed to detect "cases" of mental distress. It is a 12-  
10 question tool, summed up to give an overall score, ranging from 0 to 12, and a cut off of 4  
11 points or more is considered an indication of clinically relevant mental distress (20). As such,  
12 "Mental distress" was categorised as ≥4 on the summary GHQ-12 scale.

### Work related

13 Current work ≥9 <9  
14 ability with  
15 regard to best  
16 ever  
17 Self-rated work ability captured with the single item question from the work ability index (16).  
18 Current work ability was rated, with regard to ever best, on a 10-point ordinal scale. Based on  
19 the hypothesis that "less-than-optimal" work ability could constitute a risk in this environment,  
20 the responses were dichotomised as high (≥9) (*reference*) and moderate (<9).

21 Direct from basic No Yes  
22 military training  
23 (within 3 mo. )  
24 Finishing basic military training within three months of the course start was considered a risk,  
25 due to the assumption that these soldiers had had less time to adapt to load carriage within the  
26 military. Therefore dichotomised as *yes* or *no* (*reference*).

### Physical training habits

27 Physical training; >2 ≤2  
28 sessions per week sessions sessions  
29 /week /week  
30 Average number of training sessions per week, exceeding 20 minutes, were rated on a five  
31 point ordinal scale as ≤1 day/week, 2 days/week, 3-4 days/week and ≥5 day/week. This item  
32 was derived (in addition to an increased number of maximum sessions) from items previously  
33 used in several public health cohorts in Sweden (21, 22). A U-shaped relationship with LBP  
34 was hypothesised for number of physical training sessions per week, i.e. too little and too  
35 much training may both be risks for LBP. Consequently, the training sessions per week  
36 variable was categorised as ≤2 session/week, 3-4 sessions/week (*reference*) and ≥5  
37 sessions/week, but reduced to a dichotomised variable for LBP limiting work ability as no  
38 significant difference between the upper and reference category was found.

39 Muscular strength 2-4 ≤1  
40 training; session sessions sessions  
41 per week /week /week  
42 A U-shaped relationship with LBP was hypothesised for number of strength training sessions  
43 per week, i.e. too little and too much training may both be risks for LBP. Consequently *Weekly*  
44 *strength training* was categorised as ≤1 session/week, 2-4 sessions/week (*reference*) and ≥5  
45 sessions/week.

|                                             |                  |                         |                                                                                                                                                                                                                                                                                                                                    |
|---------------------------------------------|------------------|-------------------------|------------------------------------------------------------------------------------------------------------------------------------------------------------------------------------------------------------------------------------------------------------------------------------------------------------------------------------|
|                                             |                  | $\geq 5$                | sessions/week.                                                                                                                                                                                                                                                                                                                     |
|                                             |                  | sessions                |                                                                                                                                                                                                                                                                                                                                    |
|                                             |                  | /week                   |                                                                                                                                                                                                                                                                                                                                    |
| Aerobic fitness training; sessions per week | >1 session /week | $\leq 1$ sessions /week | <i>Weekly aerobic training</i> was dichotomised as $\leq 1$ session/week or >1 ( <i>reference</i> ), given two session per week a priori considered to be a realistic minimal amount of cardio vascular training necessary to maintain sufficient aerobic capacity during the physically demanding basic military training course. |

**Table 2.** Physical test; independent variables, the form in which they were included in regression analysis, procedures for retrieving the data and rationale for categorisation.

| Independent variable               | Reference | Exposure   | Measurement procedure and variable management                                                                                                                                                                                                                                                                                                                                                                                                                                                                                                                                                                                                                                                                  |
|------------------------------------|-----------|------------|----------------------------------------------------------------------------------------------------------------------------------------------------------------------------------------------------------------------------------------------------------------------------------------------------------------------------------------------------------------------------------------------------------------------------------------------------------------------------------------------------------------------------------------------------------------------------------------------------------------------------------------------------------------------------------------------------------------|
| <b>Strength tests</b>              |           |            |                                                                                                                                                                                                                                                                                                                                                                                                                                                                                                                                                                                                                                                                                                                |
| Kettlebells lift; kg x repetitions | > 760     | $\leq 760$ | Pairs of kettlebells weighing 32, 24, or 16 kg each were used. The intended test weights were 2x32 kg, but subjects unable to perform the test safely with these loads could choose the lighter kettlebells. To make sure that the correct and safe lifting technique was used, all participants performed two test-lifts using a lower weight while being supervised by the test leader. The test measured the number of (correct) lifts of the weights performed in one minute. Based on the assumption that marines with the lowest lifting capacity are at greater risk of LBP, the lower tertile of the product of “numbers of lifts x weight lifted” was compared to the upper two tertiles (reference). |
| Pull-up; number of                 | $\geq 4$  | $\leq 3$   | Hanging from a pull-up bar, using an overhand grip with hands placed shoulder-width apart, the participants lifted their body until their chin was level with the bar. The number of (correct) lifts                                                                                                                                                                                                                                                                                                                                                                                                                                                                                                           |

repetitions

performed in one minute was recorded in the test protocol. The number of correct ‘chins’ is dichotomised as  $\leq 3$  or  $\geq 4$  (*reference*). Internationally, the cut-off for passing a pull-up test during yearly physical assessments for marines ranges from 3 (US marines) to 5 (Royal Marines) and as such, assuming that marines with the lowest pull-up capacity are at greater risk of LBP, the cut-off for the reference category was set at the median,  $\geq 4$  pull-ups (*reference*).

### Movement control tests

*To make sure failure of any of the movement control tests was due to a “real” inability to control direction and not unfamiliarity with the test movement, all participants performed the test three to six times with feedback from the tester to ensure familiarisation. To monitor the movement of the lumbar spine, an air-filled pressure sensor (Pressure Biofeedback Unit, Chattanooga Group, Hixon, TN) was placed under the lower back.*

Double Leg Lift & Lower

pass

fail

The test assesses the ability to prevent extension and flexion of the lumbar spine (26). The subject, from a supine position, lifts both feet off the bench to a 90° hip flexion, and then lowers them back to the bench. Any uncontrolled movements in flexion or extension, defined as an  $\geq 5$ mmHg change (from the starting pressure of 40mmHg), were recorded on the test protocol. Test performance on *flexion* and *extension* assessed in the tests was analysed as pass or fail.

Double Leg Lift & Alternate Leg Extension:

pass

fail

The test assesses the ability to prevent extension, flexion and rotation of the lumbar spine, and leg abduction, lateral rotation, and hip forward glide (26). The subject, from a supine position lifts both feet off the bench to a 90° hip flexion, then lowers and straightens one leg to a fully extended position and then back to a 90° hip flexion, before repeating the test on the other side. The direction of any uncontrolled movements, defined as  $\geq 5$ mmHg change (from the starting pressure of 40mmHg), was recorded on the test protocol. Test performance for *flexion* and *extension* assessed in the tests was analysed as pass or fail.

**Table 3.** Demographic characteristics, physical characteristics and self-rated health at baseline.

|                                                         | <b>Mean</b> | <b>SD</b>     |
|---------------------------------------------------------|-------------|---------------|
| Age (years)                                             | 21.8        | 3.4           |
| Body weight (kg)                                        | 80.0        | 10.1          |
| Body height (m)                                         | 1.82        | 0.07          |
| Body mass index (kg/m <sup>2</sup> )                    | 24.1        | 2.5           |
| GHQ-12 Score                                            | 1.8         | 1.6           |
| Muscular strength training; hours per week <sup>a</sup> | 4.5         | 2.7           |
| Aerobic fitness training; hours per week <sup>b</sup>   | 3.1         | 1.9           |
|                                                         | <b>%</b>    | <b>95% CI</b> |
| <b>Smoking</b>                                          |             |               |
| No                                                      | 71.7        | 58.4-82.0     |
| Occasionally                                            | 28.3        | 18.0-42.6     |
| Yes                                                     | 0.0         | 0.0-6.8       |
| <b>Snus (smokeless tobacco)</b>                         |             |               |
| No                                                      | 64.2        | 50.7-75.7     |
| Occasionally                                            | 11.3        | 5.3-22.6      |
| Yes                                                     | 24.5        | 14.9-37.6     |
|                                                         | <b>%</b>    | <b>95% CI</b> |
| <b>Baseline testing</b>                                 |             |               |
| Pull-ups                                                | 7.8         | 5.2           |
| Kettlebell lifts                                        |             |               |
| Average lifts                                           | 17.6        | 6.4           |
| Kettlebell, average weight (x2)                         | 29.8        | 4.1           |
|                                                         | <b>%</b>    | <b>95% CI</b> |
| <b>MCM-Tests, per direction;</b>                        |             |               |
| DLL-L Flex; Fail                                        | 19.2        | 10.8-31.9     |
| DLL-L Ext; Fail                                         | 34.6        | 23.2-48.2     |
| DLL-ALE Flex; Fail                                      | 19.6        | 11.0-32.5     |
| DLL-ALE Ext; Fail                                       | 43.1        | 30.1-56.7     |

Note: Reported with mean and standard deviation (SD) or percentage and corresponding 95% Wilson Score confidence interval (95% CI).

<sup>a</sup>Average weekly hours of muscular strength training during previous six months (median (interquartile range) all; 4(3.5), males; 4(3.5), females 3(3)).

<sup>b</sup>Average weekly hours of aerobic fitness training during previous six months (median (interquartile range) all; 3(2), males; 3(2), females 5(3)).

**Table 4.** Regression analyses of individual physical characteristics, work- and health-related risk variables: univariate and multiple final adjusted† hazard ratio (HR) for low back pain (LBP) during the marine training course.

| Variable                                               | Univariate |        |         | Final Crude Multivariable |        |         |      | Final Adjusted Multivariable <sup>a</sup> |         |      |      |        |
|--------------------------------------------------------|------------|--------|---------|---------------------------|--------|---------|------|-------------------------------------------|---------|------|------|--------|
|                                                        | HR         | 95% CI | P value | HR                        | 95% CI | P value | HR   | 95% CI                                    | P value |      |      |        |
| <b>Physical characteristics</b>                        |            |        |         |                           |        |         |      |                                           |         |      |      |        |
| Body weight (kg)                                       | 1.01       | 0.99   | 1.03    | 0.441                     |        |         |      |                                           |         |      |      |        |
| Body Height ≤ 1.80 (m)                                 | 1.48       | 0.84   | 2.58    | 0.172                     | 1.73   | 1.03    | 2.92 | 0.040                                     | 1.98    | 1.19 | 3.29 | 0.009  |
| <b>Rated health/health history</b>                     |            |        |         |                           |        |         |      |                                           |         |      |      |        |
| Mental distress (GHQ-12 Score)                         | 2.08       | 0.65   | 6.70    | 0.219                     |        |         |      |                                           |         |      |      |        |
| Back Pain; within 6 mo. prior to course start          | 2.00       | 1.09   | 3.64    | 0.025                     | 2.26   | 1.27    | 4.03 | 0.006                                     | 2.47    | 1.41 | 4.31 | <0.001 |
| Hip/Knee Pain; within 6 mo. prior to course start      | 1.50       | 0.85   | 2.66    | 0.163                     |        |         |      |                                           |         |      |      |        |
| Neck/Shoulder Pain; within 6 mo. prior to course start | 1.63       | 0.91   | 2.90    | 0.098                     |        |         |      |                                           |         |      |      |        |
| <b>Work-related</b>                                    |            |        |         |                           |        |         |      |                                           |         |      |      |        |
| Current Work ability with regard to best ever          | 1.69       | 0.97   | 2.94    | 0.064                     |        |         |      |                                           |         |      |      |        |
| Direct from basic military training (within 3 mo.)     | 1.08       | 0.62   | 1.91    | 0.779                     |        |         |      |                                           |         |      |      |        |



**Table 4. cont.**

|                                               | Univariate |        |         | Final Crude Multivariable |        |         | Final Adjusted Multivariable <sup>a</sup> |        |         |
|-----------------------------------------------|------------|--------|---------|---------------------------|--------|---------|-------------------------------------------|--------|---------|
|                                               | HR         | 95% CI | P value | HR                        | 95% CI | P value | HR                                        | 95% CI | P value |
| <b>Physical training habits past 6 months</b> |            |        |         |                           |        |         |                                           |        |         |
| Physical training;                            |            |        |         |                           |        |         |                                           |        |         |
| ≤ 2 sessions//week                            | 1.18       | 0.53   | 2.64    | 0.692                     |        |         |                                           |        |         |
| 3-4 sessions/week                             | 1.00       |        |         |                           |        |         |                                           |        |         |
| ≥ 5 sessions//week                            | 1.29       | 0.70   | 2.37    | 0.418                     |        |         |                                           |        |         |
| Muscular strength training;                   |            |        |         |                           |        |         |                                           |        |         |
| ≤ 1 sessions/week                             | 0.90       | 0.52   | 1.54    | 0.690                     |        |         |                                           |        |         |
| 2-4 sessions/week                             | 1.00       |        |         |                           |        |         |                                           |        |         |
| ≥ 5 sessions/week                             | 1.27       | 0.58   | 2.78    | 0.542                     |        |         |                                           |        |         |
| Aerobic fitness training;                     |            |        |         |                           |        |         |                                           |        |         |
| ≤ 1 session/week                              | 1.24       | 0.66   | 2.36    | 0.502                     |        |         |                                           |        |         |

<sup>a</sup> Adjusted for confounding effect of sex

**Table 5.** Regression analyses of individual physical characteristics, work- and health-related risk variables: univariate and multiple final adjusted† hazard ratio (HR) for low back pain (LBP) limiting work ability during the marine training course.

| Variable                                               | Univariate |        |         | Final Crude Multivariable |        |         | Final Adjusted Multivariable <sup>a</sup> |        |         |      |      |        |
|--------------------------------------------------------|------------|--------|---------|---------------------------|--------|---------|-------------------------------------------|--------|---------|------|------|--------|
|                                                        | HR         | 95% CI | P value | HR                        | 95% CI | P value | HR                                        | 95% CI | P value |      |      |        |
| <b>Physical characteristics</b>                        |            |        |         |                           |        |         |                                           |        |         |      |      |        |
| Body weight (kg)                                       | 1.00       | 0.96   | 1.04    | 0.991                     |        |         |                                           |        |         |      |      |        |
| Body Height ≤1.80 (m)                                  | 2.20       | 0.96   | 5.03    | 0.062                     | 3.04   | 1.35    | 6.86                                      | 0.007  | 4.48    | 2.01 | 9.97 | <0.001 |
| <b>Rated health/health history</b>                     |            |        |         |                           |        |         |                                           |        |         |      |      |        |
| Back Pain; within 6 mo. prior to course start          | 2.48       | 1.04   | 5.91    | 0.040                     | 4.47   | 1.80    | 11.11                                     | 0.001  | 3.58    | 1.44 | 8.90 | 0.006  |
| Hip/Knee Pain; within 6 mo. prior to course start      | 1.15       | 0.41   | 3.23    | 0.784                     |        |         |                                           |        |         |      |      |        |
| Neck/Shoulder Pain; within 6 mo. prior to course start | 2.79       | 1.18   | 6.57    | 0.019                     |        |         |                                           |        |         |      |      |        |
| <b>Work-related</b>                                    |            |        |         |                           |        |         |                                           |        |         |      |      |        |
| Current Work ability with regard to best ever          | 1.74       | 0.68   | 4.40    | 0.246                     |        |         |                                           |        |         |      |      |        |
| Direct from basic military training (within 3 mo.)     | 1.71       | 0.73   | 4.00    | 0.218                     |        |         |                                           |        |         |      |      |        |
| <b>Physical training habits past 6 months</b>          |            |        |         |                           |        |         |                                           |        |         |      |      |        |
| Physical training; ≤ 2 sessions/week                   | 1.87       | 0.78   | 4.49    | 0.161                     | 3.23   | 1.41    | 7.40                                      | 0.006  | 2.96    | 1.19 | 7.39 | 0.020  |
| Muscular strength training;                            |            |        |         |                           |        |         |                                           |        |         |      |      |        |

|    |                           |      |      |      |       |
|----|---------------------------|------|------|------|-------|
| 1  |                           |      |      |      |       |
| 2  |                           |      |      |      |       |
| 3  |                           |      |      |      |       |
| 4  | ≤ 1 sessions/week         | 0.86 | 0.30 | 2.43 | 0.774 |
| 5  | 2-4 sessions/week         | 1.00 |      |      |       |
| 6  | ≥ 5 sessions/week         | 1.82 | 0.79 | 4.22 | 0.161 |
| 7  |                           |      |      |      |       |
| 8  | Aerobic fitness training; |      |      |      |       |
| 9  | ≤ 1 sessions/week         | 1.41 | 0.63 | 3.15 | 0.408 |
| 10 | <hr/>                     |      |      |      |       |

11 <sup>a</sup> Adjusted for confounding effect of sex and neck/shoulder pain previous to course start

12

13

14

15

16

17

18

19

20

21

22

23

24

25

26

27

28

29

30

31

32

33

34

35

36

37

38

39

40

41

42

43

44

45

46



Recruitment and measurement procedure, number of subjects included, excluded and weekly follow ups (wk.) during the marine training course. The main focus of the different phases of the course is given together with longer field exercises and leave periods. <sup>a</sup>One subject excluded from analysis based on LBP incidence, due to LBP at baseline that lasted for more than additional five course weeks. <sup>b</sup>DLL&L; Double Leg Lift & Lower test. <sup>c</sup>DLL&ALE; Double Leg Lift & Alternate Leg Extension.

77x28mm (600 x 600 DPI)

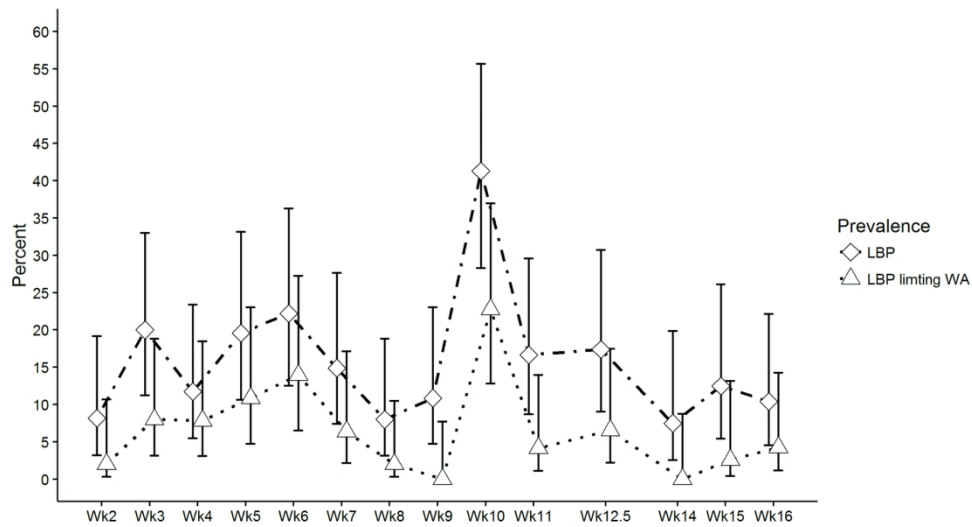

Figure 2. Weekly (Wk.) prevalence of LBP and LBP limiting work ability during the marine training course, reported as weekly proportion (percent) of cohort under study. Error bars indicate 95% confidence interval.

79x44mm (600 x 600 DPI)

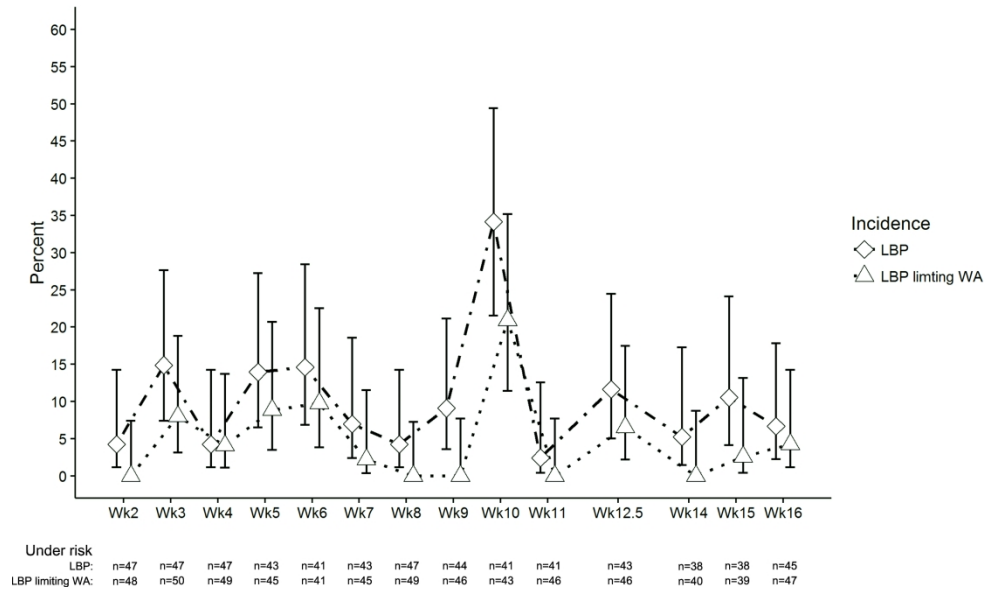

Figure 3. Weekly (Wk.) incidence of LBP and LBP limiting work ability during the marine training course, reported as weekly proportion (percent) of new pain episodes of marines at risk for a new event. Error bars indicate 95% confidence interval.

144x84mm (600 x 600 DPI)



Figure 4. Proportions of work time spent in occupational physical activity generating more and less than 2020 counts per minute; in total, with, and without combat load carriage ( $\geq 17.5$  kg). Work time is based on an average weekly work-time of 38 hrs (not including long distance march training, combat obstacle course or aquatic training, constituting a weekly average of an additional 2 hrs).

110x109mm (600 x 600 DPI)



Figure 5. Proportions of work time in occupational physical activity reported per category of physical intensity (42), for total work time and time with/without combat load carriage ( $\geq 17.5\text{Kg}$ ) for three consecutive course weeks with different learning objectives; "combat training (course week 6)", "orientation and communication (course week 7)" and "advanced combat training (course week 8)".

65x33mm (600 x 600 DPI)



# Low back pain in the marine training course: A longitudinal observational study of back pain incidence, risk factors, and occupational physical activity in Swedish marine trainees

## Supplementary Files

**Supplementary Table 1.** Incidence rate (IR) based on time to first LBP, and LBP limiting work-ability, episode during the marine training course.

|                      | LBP              |      |          | LBP limiting work ability |     |         |
|----------------------|------------------|------|----------|---------------------------|-----|---------|
|                      | Time at risk     | IR   | 95%CI    | Time at risk              | IR  | 95%CI   |
| Per 100 person-weeks | 398 person weeks | 9.0  | 6.5-12.5 | 539 person weeks          | 3.9 | 2.5-6.0 |
| Per 1000 person-days | 2786 person days | 12.9 | 9.3-17.9 | 3773 person days          | 5.6 | 3.6-8.5 |

**Supplementary Table 2.** Regression analyses of individual physical characteristics, work- and health-related risk variables: initial multiple hazard ratio (HR) for low back pain (LBP) and LBP limiting work ability during the marine training course.

| Variable                                               | LBP limiting work ability<br>Initial Multivariable |           |         | LBP limiting work ability<br>Initial Multivariable |           |         |
|--------------------------------------------------------|----------------------------------------------------|-----------|---------|----------------------------------------------------|-----------|---------|
|                                                        | HR                                                 | 95% CI    | P value | HR                                                 | 95% CI    | P value |
| <b>Physical characteristics</b>                        |                                                    |           |         |                                                    |           |         |
| Body Height $\leq 1.80$ (m)                            | 1.69                                               | 1.02 2.79 | 0.040   | 2.90                                               | 1.31 6.43 | 0.009   |
| <b>Rated health/health history</b>                     |                                                    |           |         |                                                    |           |         |
| Back Pain; within 6 mo. prior to course start          | 1.61                                               | 0.85 3.05 | 0.145   | 2.42                                               | 0.89 6.55 | 0.082   |
| Hip/Knee Pain; within 6 mo. prior to course start      | 1.30                                               | 0.75 2.27 | 0.350   |                                                    |           |         |
| Neck/Shoulder Pain; within 6 mo. prior to course start | 1.25                                               | 0.68 2.35 | 0.483   | 2.35                                               | 0.76 7.21 | 0.136   |
| <b>Work-related</b>                                    |                                                    |           |         |                                                    |           |         |
| Current Work ability with regard to best ever          | 1.48                                               | 0.86 2.54 | 0.152   |                                                    |           |         |
| <b>Physical training habits past 6months</b>           |                                                    |           |         |                                                    |           |         |
| Physical training;<br>$\leq 2$ sessions/week           |                                                    |           |         | 3.16                                               | 1.23 8.13 | 0.017   |
| Muscular strength training;<br>$\leq 1$ sessions/week  |                                                    |           |         | 0.44                                               | 0.12 1.61 | 0.215   |
| 2-4 sessions/week                                      |                                                    |           |         |                                                    |           |         |
| $\geq 5$ sessions/week                                 |                                                    |           |         | 1.27                                               | 0.45 3.54 | 0.649   |

**Supplementary Table 3.** Regression analyses of clinical tests: univariate and multiple final adjusted<sup>†</sup> hazard ratio (HR) for low back pain during the marine training course.

|                                                   | Univariate |        |         | Final Adjusted Model <sup>a</sup> |        |         |            |
|---------------------------------------------------|------------|--------|---------|-----------------------------------|--------|---------|------------|
|                                                   | HR         | 95% CI | P value | HR                                | 95% CI | P value |            |
| <b>Physical/clinical tests</b>                    |            |        |         |                                   |        |         |            |
| Kettlebell lifts; kg*rep<br>≤760 (lowest tertile) | 1.48       | 0.82   | 2.67    | 0.198                             |        |         |            |
| <b>Sensitivity analysis</b>                       |            |        |         |                                   |        |         |            |
| CC (i.e. only male)                               | 1.44       | 0.76   | 2.7     | 0.261                             |        |         |            |
| Imputed (only male)                               | 1.48       | 0.75   | 2.91    | 0.256                             |        |         |            |
| Pull-ups<br>≤ 3                                   | 1.99       | 1.11   | 3.56    | 0.020                             | 1.87   | 1.17    | 3.01 0.009 |
| <b>Sensitivity analysis</b>                       |            |        |         |                                   |        |         |            |
| CC (i.e. only male)                               | 2.00       | 1.10   | 3.66    | 0.025                             | 1.82   | 1.16    | 2.88 0.009 |
| Imputed (only male)                               | 1.94       | 1.06   | 3.54    | 0.032                             | 1.81   | 1.13    | 2.91 0.014 |
| <b>MCM-Tests,<br/>direction specific;</b>         |            |        |         |                                   |        |         |            |
| DLL-L Flex; <i>Fail</i>                           | 0.82       | 0.39   | 1.75    | 0.613                             |        |         |            |
| DLL-L Ext; <i>Fail</i>                            | 0.82       | 0.47   | 1.46    | 0.508                             |        |         |            |
| DLL-ALE Flex; <i>Fail</i>                         | 0.71       | 0.32   | 1.56    | 0.388                             |        |         |            |
| DLL-ALE Ext; <i>Fail</i>                          | 1.35       | 0.76   | 2.40    | 0.310                             |        |         |            |

<sup>a</sup>Adjusted for prior back pain and body height

Abbreviations; CC; complete cases, DLL-L Flex; Double leg lift-lower lumbar flexion-control, DLL-L Ext; Double leg lift-lower lumbar extension-control, DLL-ALE Flex; Double leg lift-alternate leg extension lumbar flexion-control, DLL-L Ext; Double leg lift-alternate leg extension lumbar extension-control.

**Supplementary Table 4.** Regression analyses of clinical tests: univariate hazard ratio (HR) for low back pain limiting work ability during the marine training course.

|                                       | HR   | 95% CI    | P value |
|---------------------------------------|------|-----------|---------|
| <b>Physical/clinical tests</b>        |      |           |         |
| Kettlebell lifts; kg*rep              |      |           |         |
| ≤760 (lowest tertile)                 | 1.02 | 0.67 1.54 | 0.923   |
| <b>Sensitivity analysis</b>           |      |           |         |
| Complete cases (i.e. only male)       | 1.10 | 0.31 3.92 | 0.884   |
| Imputed (only male)                   | 1.12 | 0.37 3.39 | 0.834   |
| Pull-ups                              |      |           |         |
| ≤ 3                                   | 1.02 | 0.75 1.38 | 0.912   |
| <b>Sensitivity analysis</b>           |      |           |         |
| Complete cases (i.e. only male)       | 1.23 | 0.42 3.64 | 0.709   |
| Imputed (only male)                   | 1.29 | 0.46 3.60 | 0.631   |
| <b>MCM-Tests, direction specific;</b> |      |           |         |
| DLL-L Flex; <i>Fail</i>               | 0.71 | 0.21 2.43 | 0.587   |
| DLL-L Ext; <i>Fail</i>                | 0.85 | 0.35 2.06 | 0.715   |
| DLL-ALE Flex; <i>Fail</i>             | 0.76 | 0.23 2.54 | 0.650   |
| DLL-ALE Ext; <i>Fail</i>              | 0.71 | 0.29 1.73 | 0.452   |

Abbreviations; DLL-L Flex; Double leg lift-lower lumbar flexion-control, DLL-L Ext; Double leg lift-lower lumbar extension-control, DLL-ALE Flex; Double leg lift-alternate leg extension lumbar flexion-control, DLL-L Ext; Double leg lift-alternate leg extension lumbar extension-control.

**STROBE 2007 (v4) Statement—Checklist of items that should be included in reports of *cohort studies***

| Section/Topic                | Item # | Recommendation                                                                                                                                                                       | Reported on page #      |
|------------------------------|--------|--------------------------------------------------------------------------------------------------------------------------------------------------------------------------------------|-------------------------|
| <b>Title and abstract</b>    | 1      | (a) Indicate the study's design with a commonly used term in the title or the abstract                                                                                               | Page 1 and 2            |
|                              |        | (b) Provide in the abstract an informative and balanced summary of what was done and what was found                                                                                  | Page 2                  |
| <b>Introduction</b>          |        |                                                                                                                                                                                      |                         |
| Background/rationale         | 2      | Explain the scientific background and rationale for the investigation being reported                                                                                                 | Page 4                  |
| Objectives                   | 3      | State specific objectives, including any prespecified hypotheses                                                                                                                     | Page 4-5                |
| <b>Methods</b>               |        |                                                                                                                                                                                      |                         |
| Study design                 | 4      | Present key elements of study design early in the paper                                                                                                                              | Page 5                  |
| Setting                      | 5      | Describe the setting, locations, and relevant dates, including periods of recruitment, exposure, follow-up, and data collection                                                      | Page 5 and Fig.1        |
| Participants                 | 6      | (a) Give the eligibility criteria, and the sources and methods of selection of participants. Describe methods of follow-up                                                           | Page 5 and 7            |
|                              |        | (b) For matched studies, give matching criteria and number of exposed and unexposed                                                                                                  | Not applicable          |
| Variables                    | 7      | Clearly define all outcomes, exposures, predictors, potential confounders, and effect modifiers. Give diagnostic criteria, if applicable                                             | Pages 7-8 and Table 1-2 |
| Data sources/<br>measurement | 8*     | For each variable of interest, give sources of data and details of methods of assessment (measurement). Describe comparability of assessment methods if there is more than one group | Table 1-2               |
| Bias                         | 9      | Describe any efforts to address potential sources of bias                                                                                                                            | Page 8                  |
| Study size                   | 10     | Explain how the study size was arrived at                                                                                                                                            | Page 5                  |
| Quantitative variables       | 11     | Explain how quantitative variables were handled in the analyses. If applicable, describe which groupings were chosen and why                                                         | Table 1-2               |
| Statistical methods          | 12     | (a) Describe all statistical methods, including those used to control for confounding                                                                                                | Page 8 and 9-10         |
|                              |        | (b) Describe any methods used to examine subgroups and interactions                                                                                                                  | Page 10                 |
|                              |        | (c) Explain how missing data were addressed                                                                                                                                          | Page 8-9                |
|                              |        | (d) If applicable, explain how loss to follow-up was addressed                                                                                                                       | Pages 7,8 and Fig.1     |
|                              |        | (e) Describe any sensitivity analyses                                                                                                                                                | Page 9                  |
| <b>Results</b>               |        |                                                                                                                                                                                      | Page 10                 |

|                          |     |                                                                                                                                                                                                              |                                                    |
|--------------------------|-----|--------------------------------------------------------------------------------------------------------------------------------------------------------------------------------------------------------------|----------------------------------------------------|
| Participants             | 13* | (a) Report numbers of individuals at each stage of study—eg numbers potentially eligible, examined for eligibility, confirmed eligible, included in the study, completing follow-up, and analysed            | Page 5, Fig 1. and Fig.3                           |
|                          |     | (b) Give reasons for non-participation at each stage                                                                                                                                                         | Page 5, Fig 1. and Fig.3                           |
|                          |     | (c) Consider use of a flow diagram                                                                                                                                                                           | Fig 1.                                             |
| Descriptive data         | 14* | (a) Give characteristics of study participants (eg demographic, clinical, social) and information on exposures and potential confounders                                                                     | Page 5 and table 3                                 |
|                          |     | (b) Indicate number of participants with missing data for each variable of interest                                                                                                                          | Page 8                                             |
|                          |     | (c) Summarise follow-up time (eg, average and total amount)                                                                                                                                                  | Supplementary Table 1.                             |
| Outcome data             | 15* | Report numbers of outcome events or summary measures over time                                                                                                                                               | Page 11, Fig. 2-3 and Supplementary Table 1.       |
| Main results             | 16  | (a) Give unadjusted estimates and, if applicable, confounder-adjusted estimates and their precision (eg, 95% confidence interval). Make clear which confounders were adjusted for and why they were included | Page 10-11, Table 4-5 and Supplementary Table 3-4. |
|                          |     | (b) Report category boundaries when continuous variables were categorized                                                                                                                                    | Tables 1 and 2                                     |
|                          |     | (c) If relevant, consider translating estimates of relative risk into absolute risk for a meaningful time period                                                                                             |                                                    |
| Other analyses           | 17  | Report other analyses done—eg analyses of subgroups and interactions, and sensitivity analyses                                                                                                               | Page 10-11, Supplementary Table 2-4.               |
| <b>Discussion</b>        |     |                                                                                                                                                                                                              |                                                    |
| Key results              | 18  | Summarise key results with reference to study objectives                                                                                                                                                     | Page 11                                            |
| <b>Limitations</b>       |     |                                                                                                                                                                                                              |                                                    |
| Interpretation           | 20  | Give a cautious overall interpretation of results considering objectives, limitations, multiplicity of analyses, results from similar studies, and other relevant evidence                                   | Pages 11-14                                        |
| Generalisability         | 21  | Discuss the generalisability (external validity) of the study results                                                                                                                                        | Page 11-12                                         |
| <b>Other information</b> |     |                                                                                                                                                                                                              |                                                    |
| Funding                  | 22  | Give the source of funding and the role of the funders for the present study and, if applicable, for the original study on                                                                                   | Page 15                                            |

|  |  |                                    |  |
|--|--|------------------------------------|--|
|  |  | which the present article is based |  |
|--|--|------------------------------------|--|

\*Give information separately for cases and controls in case-control studies and, if applicable, for exposed and unexposed groups in cohort and cross-sectional studies.

**Note:** An Explanation and Elaboration article discusses each checklist item and gives methodological background and published examples of transparent reporting. The STROBE checklist is best used in conjunction with this article (freely available on the Web sites of PLoS Medicine at <http://www.plosmedicine.org/>, Annals of Internal Medicine at <http://www.annals.org/>, and Epidemiology at <http://www.epidem.com/>). Information on the STROBE Initiative is available at [www.strobe-statement.org](http://www.strobe-statement.org).

For peer review only

# BMJ Open

## A longitudinal observational study of back pain incidence, risk factors, and occupational physical activity in Swedish marine trainees

|                                 |                                                                                                                                                                                                                                                                                                                                                                                                                                                                                                                                                                                                                                                                                                  |
|---------------------------------|--------------------------------------------------------------------------------------------------------------------------------------------------------------------------------------------------------------------------------------------------------------------------------------------------------------------------------------------------------------------------------------------------------------------------------------------------------------------------------------------------------------------------------------------------------------------------------------------------------------------------------------------------------------------------------------------------|
| Journal:                        | <i>BMJ Open</i>                                                                                                                                                                                                                                                                                                                                                                                                                                                                                                                                                                                                                                                                                  |
| Manuscript ID                   | bmjopen-2018-025150.R2                                                                                                                                                                                                                                                                                                                                                                                                                                                                                                                                                                                                                                                                           |
| Article Type:                   | Research                                                                                                                                                                                                                                                                                                                                                                                                                                                                                                                                                                                                                                                                                         |
| Date Submitted by the Author:   | 26-Feb-2019                                                                                                                                                                                                                                                                                                                                                                                                                                                                                                                                                                                                                                                                                      |
| Complete List of Authors:       | Monnier, Andreas; Karolinska Institutet, Department of Neurobiology, Care Sciences and Society; Swedish Armed Forces, Military Academy Karlberg<br>Larsson, Helena; Karolinska Institutet, Department of Neurobiology, Care Sciences and Society; Swedish Armed Forces, Headquarters, Medical Services<br>Nero, Håkan; Lund University, Department of Orthopedics, Faculty of Medicine<br>Djupsjöbacka, Mats; University of Gävle, Centre for Musculoskeletal Research, Department of Occupational Health Science and Psychology<br>Ång, Björn; Dalarna University, School of Education, Health and Social Studies; Karolinska Institutet, Department of Neurobiology, Care Sciences and Society |
| <b>Primary Subject Heading</b>: | Epidemiology                                                                                                                                                                                                                                                                                                                                                                                                                                                                                                                                                                                                                                                                                     |
| Secondary Subject Heading:      | Epidemiology                                                                                                                                                                                                                                                                                                                                                                                                                                                                                                                                                                                                                                                                                     |
| Keywords:                       | Back pain < ORTHOPAEDIC & TRAUMA SURGERY, EPIDEMIOLOGY, OCCUPATIONAL & INDUSTRIAL MEDICINE, PREVENTIVE MEDICINE                                                                                                                                                                                                                                                                                                                                                                                                                                                                                                                                                                                  |
|                                 |                                                                                                                                                                                                                                                                                                                                                                                                                                                                                                                                                                                                                                                                                                  |

SCHOLARONE™  
Manuscripts



# A longitudinal observational study of back pain incidence, risk factors, and occupational physical activity in Swedish marine trainees

Andreas Monnier<sup>1,2,3\*</sup>, Helena Larsson<sup>1,4</sup>, Håkan Nero<sup>5</sup>, Mats Djupsjöbacka<sup>6</sup>, and Björn O. Äng<sup>1,2,7</sup>

<sup>1</sup> Department of Neurobiology, Care Sciences and Society, Division of Physiotherapy, Karolinska Institutet, Huddinge, Sweden

<sup>2</sup> School of Education, Health and Social Studies, Dalarna University, Falun, Sweden

<sup>3</sup> Swedish Armed Forces, Military Academy Karlberg, Stockholm, Sweden

<sup>4</sup> Swedish Armed Forces, Headquarters, Medical Services, Stockholm, Sweden

<sup>5</sup> Department of Orthopedics, Faculty of Medicine, Lund University, Lund, Sweden

<sup>6</sup> Centre for Musculoskeletal Research, Department of Occupational Health Science and Psychology, University of Gävle, Gävle, Sweden

<sup>7</sup> Center for Clinical Research, Uppsala University, Falun, Sweden

\*Corresponding author

*Address for correspondence and reprint requests:*

E-mail: [andreas.monnier@ki.se](mailto:andreas.monnier@ki.se)

## Abstract

**Objectives:** To evaluate the occurrence of LBP and LBP that limits work ability, to identify their potential early risks and to quantify occupational physical activity in Swedish Armed Forces (SwAF) marines during their basic four-month marine training course.

**Design:** Prospective observational cohort study with weekly follow-ups.

**Participants:** Fifty-three SwAF marines entering the training course.

**Outcomes:** Incident of LBP and its related effect on work-ability, and associated early risks. Occupational physical activity, as monitored using accelerometers and self-reports.

**Results:** During the training course, 68% of the marines experienced at least one episode of LBP. This yielded a LBP and LBP limiting work ability incidence rate of 13.5 (95% CI 10.4–17.8) and 6.3 (95% CI 4.2–10.0) episodes per 1000 person-days, respectively. Previous back pain and shorter body height ( $\leq 1.80\text{m}$ ) emerged as independent risks for LBP (HR 2.5, 95% CI 1.4–4.3; HR 2.0, 95% CI 1.2–3.3, respectively), as well as for LBP that limited work ability (HR 3.6, 95% CI 1.4–8.9; 4.5, 95% CI 2.0–10.0, respectively). Furthermore, managing fewer than four pull-ups emerged as a risk for LBP (HR 1.9, 95% CI 1.2–3.0), while physical training of fewer than three sessions per week emerged as a risk for LBP that limited work ability (HR 3.0, 95% CI 1.2–7.4). More than 80% of the work time measured was spent performing low levels of ambulation, however, combat equipment ( $\geq 17.5\text{ Kg}$ ) was carried for more than half of the work time.

**Conclusions:** Incidents of LBP are common in SwAF marines' early careers. The link between LBP and previous pain as well as low levels of exercise highlights the need for preventive actions early on in a marine's career. The role of body height on LBP needs further investigation, including its relationship with body-worn equipment, before it can effectively contribute to LBP prevention.

## Strengths and limitations of this study

- The present unique prospective study design with weekly follow ups that is conducted early on in the marines' careers is believed to have a strong potential to fill knowledge gaps in LBP epidemiology in marine regiments and similar military units.
- The use of a repeated time-to-event regression method, with discontinued risk intervals, better reflects the recurrent nature of LBP, and makes more use of collected data than methods using single time-to-first events as an outcome.
- The definition of a new episode of LBP used in the present study does not distinguish between a new "uniquely" first event and a "symptom flare up" from a recurrent chain of events, which is a problem seen in most studies on back pain or other musculoskeletal pain problems.

- 1  
2  
3  
4  
5  
6  
7
- The results for the two physical “max” tests of pull-ups and kettle-bell lifts are limited to male marines only, as no female marines performed these tests.

8 **Keywords:** Back pain, longitudinal, military, musculoskeletal disorders, musculoskeletal  
9 injury, occupational exposure, physical test, prevention, work ability, work exposure.  
10  
11  
12  
13  
14  
15  
16  
17  
18  
19  
20  
21  
22  
23  
24  
25  
26  
27  
28  
29  
30  
31  
32  
33  
34  
35  
36  
37  
38  
39  
40  
41  
42  
43  
44  
45  
46  
47  
48  
49  
50  
51  
52  
53  
54  
55  
56  
57  
58  
59  
60

For peer review only

## Background

Low back pain (LBP) is an epidemiological and clinical problem; it is the leading cause of disability worldwide (1). Its nature is commonly recurrent and causes reduction in physical activity (2) and work ability (3). Societal groups associated with high levels of physical activity are indeed not spared musculoskeletal problems, and this includes highly trained military units. In fact, approximately 40% of Swedish Armed Forces (SwAF) marines on active duty experience LBP within a six-month period, and about half of these experience related limitations in work ability (4). This indicates that LBP could have a severe impact on the SwAF marines' operational readiness, as is seen internationally in marine units (5), which warrants preventive actions. Given the recurrent nature of LBP (6), preventive measures are a high priority and are believed to be most effective early in a marine's career. While the occurrence of and risk factors for musculoskeletal disorders in initial basic military training have been investigated (7, 8), the subsequent early phases of a marine's career have received less scientific attention; thus the need exists to address this gap in knowledge regarding risks for LBP in active-duty marines.

A high occurrence of musculoskeletal disorders is considered to be present by the SwAF occupational health personnel even during the four-month SwAF marine training course, where soldiers that have completed basic training are given their first marine-specific training. This physically demanding course focuses on marine-specific occupational tasks, including long range foot patrols with heavy equipment and assault operations from combat crafts (high-speed boats). Given the nature of this first and mandatory part of a marine's career, preventive measures at this stage could have a significant effect on the occurrence of future LBP in this group, and this has long been named a priority research topic in many military nations. Results gained from prospective studies in such communities, where occupational load and tasks are homogeneous and well known, have – we believe – great potential to fill knowledge gaps for further actions in defined military units.

Notably, medical examinations, health appraisals, and the evaluation of physical performance are basic routine procedures at the start of a military training course or before deployments. Information from such early examinations along with known risks from civilian contexts, such as a history of previous pain episodes (9, 10), physiological distress, or lifestyle factors (10, 11), has the potential to provide relevant risk information in operating activities. While low physical capacity and low performance on military physical fitness tests have previously been indicated as risks for LBP (12, 13), the screening of marines or similar elite units before entering the course with valid tests for their occupational exposures is not presently performed. New physical screening protocols have indeed been developed and introduced for other SwAF units, covering areas possibly related to the development of LBP in marines as well, for example lifting- and load-carrying capacities (14).

While detailed knowledge of LBP occurrence and associated risk factors constitutes the foundation for early prevention of LBP within this occupational group, such information has to be interpreted in relation to the occupational physical demands on marines. Here, objective monitoring of occupational physical activity during the marine training course could aid in the

1  
2  
3 interpretation of identified risks. This study therefore aimed to prospectively evaluate the  
4 occurrence of LBP and its effect on work ability, as well as to identify potential early risks for  
5 such disorders in soldiers during the marine training course. Further aims were to quantify  
6 occupational physical activity and work-related exposure during the course.  
7  
8  
9

## 10 11 **Methods**

### 12 13 **Study design**

14  
15  
16 This study used a prospective observational design with a cohort of SwAF marines entering  
17 the four-month marine training course. A screening program consisting of a self-administered  
18 questionnaire and a battery of physical tests was conducted at the start of the course, while  
19 pain occurrences were then followed up on a weekly basis. Occupational physical activity was  
20 continuously monitored with accelerometers worn during working hours for seven weeks of  
21 the course by a sub-cohort of participants; this was supplemented by platoon and individual  
22 logs of work tasks and physical training. All data collection was conducted at the 1st Marine  
23 Regiment, Stockholm, Sweden, between January and May, 2015. The study was approved in  
24 advance by the Regional Medical Research Ethics Committee, Stockholm (2014/1904-31/2).  
25 After receiving written and oral information on the study, signed informed consent was  
26 obtained from all participants prior to enrolment. Measurement occasions and the focus of the  
27 different phases of the course are illustrated in Figure 1, along with information on the  
28 participants' progression throughout the study.  
29  
30  
31  
32  
33

34 *Figure 1. about here*

### 35 36 **Patient involvement**

37  
38 Given the defined target group in the present study, no patients seeking medical care were  
39 recruited. The present research questions and outcomes are based on data/conclusions from  
40 our on-going translational research on active duty marines (4, 15); it is also influenced by our  
41 empirical knowledge and clinical work in this population. The Marines' medical and  
42 occupational health services have taken part in planning the data collection, and they  
43 constitute the primary way of implementing the results in clinical work for the studied  
44 population.  
45  
46  
47  
48  
49

### 50 51 **Participants**

52  
53 To be eligible for inclusion in the present study, marines had to have the intention to complete  
54 the entire marine training course. Of 56 eligible marines, 53 met the criterion, and were  
55 enrolled in the study. The mean (SD) age, body weight, height, and body mass index for the  
56 enrolled marines were: 21.8 (3.4) years, 80.0 (10.1) kg, 1.82 (0.07) m and 24.1 (2.5) kg/m<sup>2</sup>,  
57 respectively. The majority of participants (91%, n=48) were men. Ten (19%) had experienced  
58 pain in the lower back within six months prior to baseline. Marines with on-going LBP at  
59  
60

1  
2  
3 baseline lasting for five or more consecutive weeks adjacent to the course start (n=1) were  
4 excluded from analysis based on incidences.  
5  
6  
7

## 8 **Measurements and Procedure**

### 9 *Baseline questionnaires*

10  
11  
12  
13 Participants initially completed confidential questionnaires to elicit military and demographic  
14 background information (4), general health (16) and mental health (17), self-assessed work  
15 ability (16), and physical training habits. The questions, which are described in detail in Table  
16 1, have previously been used in international and Swedish public health cohorts and studies of  
17 active duty SwAF marines. The questionnaires also included detailed information on  
18 musculoskeletal pain for nine anatomical areas (18) within the past week and six months, with  
19 the following reporting options: For pain within the past week “*No pain*” or “*Pain*” and for  
20 pain within the past six months “*No pain*”, “*Pain a couple a days per month or less*”, or  
21 “*Pain a couple of days per week or more*”. Pain limiting work ability was assessed using the  
22 options “*Not limited*”, “*Limited to some extent*”, or “*Limited to a large extent*”.  
23  
24  
25  
26  
27  
28  
29  
30  
31  
32  
33  
34  
35  
36  
37  
38  
39  
40  
41  
42  
43  
44  
45  
46  
47  
48  
49  
50  
51  
52  
53  
54  
55  
56  
57  
58  
59  
60

**Table 1.** Self-reported independent variables, the form in which they were included in regression analysis, procedures for retrieving the data and rationale for categorisation.

| Independent variable                                   | Reference  | Exposure | Measurement procedure and variable management                                                                                                                                                                                                                                                                                                                                                                                                                                                                                   |
|--------------------------------------------------------|------------|----------|---------------------------------------------------------------------------------------------------------------------------------------------------------------------------------------------------------------------------------------------------------------------------------------------------------------------------------------------------------------------------------------------------------------------------------------------------------------------------------------------------------------------------------|
| <b>Physical characteristics</b>                        |            |          |                                                                                                                                                                                                                                                                                                                                                                                                                                                                                                                                 |
| Body weight                                            | Continuous |          | Body weight (in Kg) was self-reported and analysed as a continuous variable in the models.                                                                                                                                                                                                                                                                                                                                                                                                                                      |
| Body Height                                            | > 1.80m    | ≤1.80m   | Body height was self-reported. Based on the hypothesis that being either “too tall or too short” may be negative for musculoskeletal health in this environment, as previously identified for this population (4), <i>body height</i> was initially categorised as ≤1.80m, 1.81-1.85m ( <i>reference</i> ) and ≥1.86m (representing body height tertiles of the SwAF marine population, (4, 15), but was reduced to a dichotomised variable due to no difference between the upper and the reference category being identified. |
| <b>Rated health/health history</b>                     |            |          |                                                                                                                                                                                                                                                                                                                                                                                                                                                                                                                                 |
| Back Pain; within 6 mo. prior to course start          | No         | Yes      | Self-reported musculoskeletal pain in the lower and/or thoracic back , defined as “ <i>Pain a couple of days per month or less</i> ” or “ <i>Pain a couple of days per week or more</i> ” within the past six months, analysed dichotomised as <i>yes</i> or <i>no</i> as previously for this population (4, 15).                                                                                                                                                                                                               |
| Hip/Knee Pain; within 6 mo. prior to course start      | No         | Yes      | Self-reported occurrence of musculoskeletal pain in the <i>hip</i> and/or <i>knee</i> , defined as “ <i>Pain a couple of days per month or less</i> ” or “ <i>Pain a couple of days per week or more</i> ” within the past six months, analysed dichotomised as <i>yes</i> or <i>no</i> , as previously for this population.                                                                                                                                                                                                    |
| Neck/Shoulder Pain; within 6 mo. prior to course start | No         | Yes      | Self-reported musculoskeletal pain in the <i>neck</i> and/or <i>shoulder</i> , defined as “ <i>Pain a couple of days per month or less</i> ” or “ <i>Pain a couple of days per week or more</i> ” within the past six months, analysed dichotomised as <i>yes</i> or <i>no</i> , as previously in this population.                                                                                                                                                                                                              |
| Mental distress (GHQ-12 Score)                         | <4         | ≥4       | The level of mental distress was captured by the General Health Questionnaire-12 (19), a widely used screening instrument developed to detect "cases" of mental distress. It is a 12-                                                                                                                                                                                                                                                                                                                                           |

question tool, summed up to give an overall score, ranging from 0 to 12, and a cut off of 4 points or more is considered an indication of clinically relevant mental distress (20). As such, “*Mental distress*” was categorised as  $\geq 4$  on the summary GHQ-12 scale.

| <b>Work related</b>                                 |                      |                                              |                                                                                                                                                                                                                                                                                                                                                                                                                                                                                                                                                                                                                                                                                                                                                                                                                                                    |
|-----------------------------------------------------|----------------------|----------------------------------------------|----------------------------------------------------------------------------------------------------------------------------------------------------------------------------------------------------------------------------------------------------------------------------------------------------------------------------------------------------------------------------------------------------------------------------------------------------------------------------------------------------------------------------------------------------------------------------------------------------------------------------------------------------------------------------------------------------------------------------------------------------------------------------------------------------------------------------------------------------|
| Current work ability with regard to best ever       | $\geq 9$             | $< 9$                                        | Self-rated work ability captured with the single item question from the work ability index (16). Current work ability was rated, with regard to ever best, on a 10-point ordinal scale. Based on the hypothesis that “less-than-optimal” work ability could constitute a risk in this environment, the responses were dichotomised as high ( $\geq 9$ ) ( <i>reference</i> ) and moderate ( $< 9$ ).                                                                                                                                                                                                                                                                                                                                                                                                                                               |
| Direct from basic military training (within 3 mo. ) | No                   | Yes                                          | Finishing basic military training within three months of the course start was considered a risk, due to the assumption that these soldiers had had less time to adapt to load carriage within the military. Therefore dichotomised as <i>yes</i> or <i>no</i> ( <i>reference</i> ).                                                                                                                                                                                                                                                                                                                                                                                                                                                                                                                                                                |
| <b>Physical training habits</b>                     |                      |                                              |                                                                                                                                                                                                                                                                                                                                                                                                                                                                                                                                                                                                                                                                                                                                                                                                                                                    |
| Physical training; sessions per week                | $> 2$ sessions /week | $\leq 2$ sessions /week                      | Average number of training sessions per week, exceeding 20 minutes, were rated on a five point ordinal scale as $\leq 1$ day/week, 2 days/week, 3-4 days/week and $\geq 5$ day/week. This item was derived (in addition to an increased number of maximum sessions) from items previously used in several public health cohorts in Sweden (21, 22). A U-shaped relationship with LBP was hypothesised for number of physical training sessions per week, i.e. too little and too much training may both be risks for LBP. Consequently, the training sessions per week variable was categorised as $\leq 2$ session/week, 3-4 sessions/week ( <i>reference</i> ) and $\geq 5$ sessions/week, but reduced to a dichotomised variable for LBP limiting work ability as no significant difference between the upper and reference category was found. |
| Muscular strength training; session per week        | 2-4 sessions /week   | $\leq 1$ sessions /week<br>$\geq 5$ sessions | A U-shaped relationship with LBP was hypothesised for number of strength training sessions per week, i.e. too little and too much training may both be risks for LBP. Consequently <i>Weekly strength training</i> was categorised as $\leq 1$ session/week, 2-4 sessions/week ( <i>reference</i> ) and $\geq 5$ sessions/week.                                                                                                                                                                                                                                                                                                                                                                                                                                                                                                                    |



1  
2  
3  
4  
5  
6  
7  
8  
9  
10  
11  
12  
13  
14  
15  
16  
17  
18  
19  
20  
21  
22  
23  
24  
25  
26  
27  
28  
29  
30  
31  
32  
33  
34  
35  
36  
37  
38  
39  
40  
41  
42  
43  
44  
45  
46

|                                             |                  |                    |                                                                                                                                                                                                                                                                                                                              |
|---------------------------------------------|------------------|--------------------|------------------------------------------------------------------------------------------------------------------------------------------------------------------------------------------------------------------------------------------------------------------------------------------------------------------------------|
|                                             |                  | /week              |                                                                                                                                                                                                                                                                                                                              |
| Aerobic fitness training; sessions per week | >1 session /week | ≤ 1 sessions /week | <i>Weekly aerobic training</i> was dichotomised as ≤1 session/week or >1 ( <i>reference</i> ), given two session per week a priori considered to be a realistic minimal amount of cardio vascular training necessary to maintain sufficient aerobic capacity during the physically demanding basic military training course. |

---

For peer review only

### *Physical baseline tests*

Physical tests focusing on muscle strength and movement control were performed during the first ten days of the course. These tests, described in detail in Table 2, were selected on the basis of their use in clinical/preventive work among the studied population or in screening programs within the SwAF, and have previously been found reliable for use with active duty SwAF marines (23) or similar SwAF units (14). The strength tests, which were conducted following standardised SwAF instructions (14), were:

- *Kettlebell lifts* - The number of (correct) lifts of a pair of kettlebells (2 x 16, 24, or 32 kg) completed in a one-minute interval (14) and,
- *Pull-ups* - The number of (correct) pull-ups completed, performed hanging from a bar with an overhand (pronated) grip (14).

These tests were conducted within a series that also including a loaded lower limb functional test (24) (performed before these tests) and the ranger (loaded) step test (25) (performed after these tests), which are described in detail elsewhere (24, 25).

The two movement control tests were derived from the descriptions by Comerford and Mottram (26) and tested for good reliability in SwAF marines (23). These tests focus on the ability to actively control or prevent compensatory movement in the lumbar spine, i.e. flexion, extension or rotation, while actively moving the lower extremities. The tests, conducted following standardised instructions, (23) were:

- *Double Leg Lift & Lower (DLL&L)*: The subject, from a supine position, lifts both feet off the bench to a 90° hip flexion, and then lowers them back to the bench. Any uncontrolled movements in flexion or extension were recorded in the test protocol.
- *Double Leg Lift & Alternate Leg Extension (DLL&ALE)*: The subject, from a supine position, lifts both feet off the bench to a 90° hip flexion, then lowers and straightens one leg to a fully extended position and then back to a 90° hip flexion. The procedure was then repeated with the other leg, after which both legs were lowered to the starting position. The direction of any uncontrolled movements in extension, flexion, or rotation was recorded in the test protocol.

**Table 2.** Physical test; independent variables, the form in which they were included in regression analysis, procedures for retrieving the data and rationale for categorisation.

| Independent variable                                                                                                                                                                                                                                                                                                                                                                                                                                     | Reference | Exposure | Measurement procedure and variable management                                                                                                                                                                                                                                                                                                                                                                                                                                                                                                                                                                                                                                                                  |
|----------------------------------------------------------------------------------------------------------------------------------------------------------------------------------------------------------------------------------------------------------------------------------------------------------------------------------------------------------------------------------------------------------------------------------------------------------|-----------|----------|----------------------------------------------------------------------------------------------------------------------------------------------------------------------------------------------------------------------------------------------------------------------------------------------------------------------------------------------------------------------------------------------------------------------------------------------------------------------------------------------------------------------------------------------------------------------------------------------------------------------------------------------------------------------------------------------------------------|
| <b>Strength tests</b>                                                                                                                                                                                                                                                                                                                                                                                                                                    |           |          |                                                                                                                                                                                                                                                                                                                                                                                                                                                                                                                                                                                                                                                                                                                |
| Kettlebells lift; kg x repetitions                                                                                                                                                                                                                                                                                                                                                                                                                       | > 760     | ≤760     | Pairs of kettlebells weighing 32, 24, or 16 kg each were used. The intended test weights were 2x32 kg, but subjects unable to perform the test safely with these loads could choose the lighter kettlebells. To make sure that the correct and safe lifting technique was used, all participants performed two test-lifts using a lower weight while being supervised by the test leader. The test measured the number of (correct) lifts of the weights performed in one minute. Based on the assumption that marines with the lowest lifting capacity are at greater risk of LBP, the lower tertile of the product of “numbers of lifts x weight lifted” was compared to the upper two tertiles (reference). |
| Pull-up; number of repetitions                                                                                                                                                                                                                                                                                                                                                                                                                           | ≥ 4       | ≤ 3      | Hanging from a pull-up bar, using an overhand grip with hands placed shoulder-width apart, the participants lifted their body until their chin was level with the bar. The number of (correct) lifts performed in one minute was recorded in the test protocol. The number of correct ‘chins’ is dichotomised as ≤3 or ≥4 (reference). Internationally, the cut-off for passing a pull-up test during yearly physical assessments for marines ranges from 3 (US marines) to 5 (Royal Marines) and as such, assuming that marines with the lowest pull-up capacity are at greater risk of LBP, the cut-off for the reference category was set at the median, ≥4 pull-ups (reference).                           |
| <b>Movement control tests</b>                                                                                                                                                                                                                                                                                                                                                                                                                            |           |          |                                                                                                                                                                                                                                                                                                                                                                                                                                                                                                                                                                                                                                                                                                                |
| <i>To make sure failure of any of the movement control tests was due to a “real” inability to control direction and not unfamiliarity with the test movement, all participants performed the test three to six times with feedback from the tester to ensure familiarisation. To monitor the movement of the lumbar spine, an air-filled pressure sensor (Pressure Biofeedback Unit, Chattanooga Group, Hixson, TN) was placed under the lower back.</i> |           |          |                                                                                                                                                                                                                                                                                                                                                                                                                                                                                                                                                                                                                                                                                                                |
| Double Leg                                                                                                                                                                                                                                                                                                                                                                                                                                               | pass      | fail     | The test assesses the ability to prevent extension and flexion of the lumbar spine (26). The subject,                                                                                                                                                                                                                                                                                                                                                                                                                                                                                                                                                                                                          |

|    |               |      |      |                                                                                                                  |
|----|---------------|------|------|------------------------------------------------------------------------------------------------------------------|
| 1  |               |      |      |                                                                                                                  |
| 2  |               |      |      |                                                                                                                  |
| 3  | Lift & Lower  |      |      | from a supine position, lifts both feet off the bench to a 90° hip flexion, and then lowers them back            |
| 4  |               |      |      | to the bench. Any uncontrolled movements in flexion or extension, defined as an $\geq 5$ mmHg change             |
| 5  |               |      |      | (from the starting pressure of 40mmHg), were recorded on the test protocol. Test performance on                  |
| 6  |               |      |      | <i>flexion</i> and <i>extension</i> assessed in the tests was analysed as pass or fail.                          |
| 7  |               |      |      |                                                                                                                  |
| 8  | Double Leg    | pass | fail | The test assesses the ability to prevent extension, flexion and rotation of the lumbar spine, and leg            |
| 9  | Lift &        |      |      | abduction, lateral rotation, and hip forward glide (26). The subject, from a supine position lifts both          |
| 10 | Alternate Leg |      |      | feet off the bench to a 90° hip flexion, then lowers and straightens one leg to a fully extended                 |
| 11 | Extension:    |      |      | position and then back to a 90° hip flexion, before repeating the test on the other side. The direction          |
| 12 |               |      |      | of any uncontrolled movements, defined as $\geq 5$ mmHg change (from the starting pressure of                    |
| 13 |               |      |      | 40mmHg), was recorded on the test protocol. Test performance for <i>flexion</i> and <i>extension</i> assessed in |
| 14 |               |      |      | the tests was analysed as pass or fail.                                                                          |
| 15 |               |      |      |                                                                                                                  |
| 16 |               |      |      |                                                                                                                  |
| 17 |               |      |      |                                                                                                                  |
| 18 |               |      |      |                                                                                                                  |
| 19 |               |      |      |                                                                                                                  |
| 20 |               |      |      |                                                                                                                  |
| 21 |               |      |      |                                                                                                                  |
| 22 |               |      |      |                                                                                                                  |
| 23 |               |      |      |                                                                                                                  |
| 24 |               |      |      |                                                                                                                  |
| 25 |               |      |      |                                                                                                                  |
| 26 |               |      |      |                                                                                                                  |
| 27 |               |      |      |                                                                                                                  |
| 28 |               |      |      |                                                                                                                  |
| 29 |               |      |      |                                                                                                                  |
| 30 |               |      |      |                                                                                                                  |
| 31 |               |      |      |                                                                                                                  |
| 32 |               |      |      |                                                                                                                  |
| 33 |               |      |      |                                                                                                                  |
| 34 |               |      |      |                                                                                                                  |
| 35 |               |      |      |                                                                                                                  |
| 36 |               |      |      |                                                                                                                  |
| 37 |               |      |      |                                                                                                                  |
| 38 |               |      |      |                                                                                                                  |
| 39 |               |      |      |                                                                                                                  |
| 40 |               |      |      |                                                                                                                  |
| 41 |               |      |      |                                                                                                                  |
| 42 |               |      |      |                                                                                                                  |
| 43 |               |      |      |                                                                                                                  |
| 44 |               |      |      |                                                                                                                  |
| 45 |               |      |      |                                                                                                                  |
| 46 |               |      |      |                                                                                                                  |

### *Continuous assessment of work-related physical activity and occupational tasks*

Twenty-seven marines from the inception cohort were randomly assigned by a computer-generated algorithm to wear accelerometers during the course. Six declined, leaving 21 marines in this sub-cohort. They were fitted with tri-axial accelerometers (GT3X+BT, Actigraph, Pensacola, FL) and instructed to wear them on the left hip during all working hours of the course, with the exception of planned prolonged loaded marches (due to the risk of interaction with back pack hip belts resulting in abrasions or compression injuries), aquatic physical training, or during training conducted at the marine combat obstacle course (due to water obstacles). They were also instructed to remove them during field exercises conducted at other bases during weeks 11-13 of the course due to an inability to collect data at these locations. The accelerometers were initialised using ActiLife software (version 5.5), with data sampling set at a rate of 30Hz. Information on occupational tasks and equipment worn, and physical training sessions conducted, was recovered from detailed weekly schedules completed by the instructing officers, as well as from the self-reported diaries kept by the marines.

### *Weekly follow-up*

Incidence of musculoskeletal disorders and related effect on work ability were self-reported weekly during the course, using a short version of the baseline questionnaire. The number of responders for each week is illustrated in Figure 1. Weekly follow-ups were not strictly possible due to the geographic location of training during course week 12, so the follow up was conducted at the beginning of week 13 and reported as week 12.5 (i.e. week 12 and half of week 13).

### **Outcomes**

LBP was defined as the occurrence of any self-rated pain in the lower back (from the twelfth ribs to the lower gluteal folds (27) within the preceding week, as reported during the weekly follow-up. LBP limiting work ability was defined as the occurrence of any self-rated pain in the lower back within the preceding week that had limited work ability.

For incidence proportions, rates, and regression analysis (described in detail below), marines were considered to be at risk for an event as long as they were under observation, and until the occurrence of a LBP event. At the time of pain occurrence, the risk interval was discontinued and marines were not considered to be at risk for a new episode until they were pain free for the next coming week (if reporting no pain in that week, it was counted, if reporting pain also that week, the week remained censored). Meeting this requirement automatically allowed them to re-enter the analysis (pain observation period). Marines with on-going LBP at baseline were not considered at risk until they were pain free for at least one week, at which point in time they entered the analysis. Late entry was only allowed during the first four weeks to accurately reflect the independent variables collected at baseline.

## Independent variables

Independent variables analysed as potential risk factors for LBP and LBP limiting work ability were selected based on existing evidence from active-duty SwAF marines, other military and civilian populations, and empirical knowledge from clinical work with the SwAF marines. These 17 variables, including two physical characteristics, four health-related, two work-related, three on physical training habits, and the results of the two strength and the two movement control tests (in flexion and extension), are described in detail in Table 1 and 2.

## Confounding variables

*Age, BMI, sex, smoking, non-musculoskeletal co-morbidity, and LBP previously during the course* were a priori considered possible confounders. A confounder was defined as a variable that, when included during the analytic process, changed the hazard ratio of the crude regression model >20% (28).

## Data management and statistics

### Missing data

The dependent variables, i.e. LBP and LBP limiting work ability, were missing for 11% of the data due to subjects' lost to follow-up during the course. Also, of the independent variables, the kettlebell lift tests were missing for 30%, the pull-ups 23%, and the DLL-ALE test 4%, due to participants not being able (or allowed) to perform the test at baseline (illness such as having a cold or other infection in 44% of these and pain or similar co-morbidity in 56%). All female marines (n=5) missed the kettlebells lift and the pull-ups tests due to illness or on-going pain. Based on the analysis of the missing data mechanism (29), however, the data for outcomes and the DLL-ALE test were considered to be "missing completely at random" (i.e. the reason for data to be missing was not dependent of the missing data itself nor predicted by the independent variables included the analysis) and missing data on the kettlebell lift and the pull-ups tests to be "covariate missing completely at random" (missing data predicted by bodyweight and body height). Multiple imputations by Markov chain Monte Carlo, with random draws based on Jeffreys prior distribution, were used to generate 50 imputed datasets with completed data on all predictor variables, on which the pooled analyses were based (30). Given that no female marines performed the two strength tests, imputing values for females based on data from only male marines on these tests might affect the accuracy of the imputation. Therefore, regressions including these two tests were repeated, as part of the sensitivity analysis, on only complete cases, as well as on multiple imputed data with females excluded.

### Descriptive statistics

#### *LBP and LBP limiting work-ability*

1  
2  
3 Weekly prevalence was analysed as a percentage of those under observation, with 95% CI  
4 (31). Weekly incidence of LBP and LBP limiting work ability was analysed as a percentage  
5 of those at risk, with a 95% CI (31). The incidence rate of LBP and LBP limiting work ability  
6 during the course was calculated based on the number of episodes and the time at risk,  
7 presented as episodes per 1000 person-days, with a corresponding 95% CI (32).  
8  
9

### 10 *Work-related physical activity and occupational tasks*

11 Accelerometer data were analysed only if sufficient wear time could be established, which  
12 was defined as at least 180 minutes of wear time per day (for full work days) on at least three  
13 workdays (for a five-day week). Non-wear time within days was identified by algorithms  
14 suggested by Choi (33). For valid wear-time, vertical counts per minute (cpm; where the  
15 arbitrary unit of counts is the filtered raw acceleration generated by body movements and  
16 captured by the accelerometer) - based on 10-second epochs - were extracted and reported as  
17 minutes and percentage of total work time, and work time per week spent in these predefined  
18 categories: 0-99; 100-2019; 2020-5998; and 5999- cpm (34). Here, the category of 2020-5998  
19 cpm was considered to be comparable to slow to brisk walking (~3.8-7.5 km/h) (35, 36). In  
20 addition, the percentage of the workday spent in these categories was reported for time with  
21 and without load carriage (combat equipment,  $\geq 17.5$  Kg), as identified from the detailed  
22 schedules (verified against activity logs). Evaluation and comparison with work schedules  
23 were performed visually.  
24  
25  
26  
27  
28  
29  
30  
31

### 32 *Regression analysis*

33 We used the Andersen-Gill repeated time-to-event regression method (37, 38) with the robust  
34 sandwich variance estimator (39), and discontinuous risk intervals (38), as defined above, to  
35 examine the predictive association between the independent variables and LBP. The results  
36 are reported as hazard ratios (HR) with a corresponding 95% CI. Secondly, this method was  
37 applied to examine the predictive association between independent variables and LBP  
38 limiting work ability.  
39  
40  
41

42 Independent variables were analysed in two blocks. First, *physical characteristics, work- and*  
43 *health-related* variables, as identified with univariate time-to-event regressions to be  
44 associated with the dependent variable, at the level of  $p < 0.20$ , were included in a  
45 multivariable time-to-event regression model. This was followed by an iterative, purposeful  
46 selection process of deleting non-significant variables at  $p > 0.05$ . The model was then refitted  
47 and verified until a final model contained only significant ( $p < 0.05$ ) independent variables,  
48 identified confounders, and significant ( $p < 0.05$ ) interactions (between independent variables  
49 in the final model and/or independent variables and confounders) (28). This process was  
50 repeated for the *clinical tests*, with the addition of the significant *physical characteristics,*  
51 *work- and health-related* risk factors addressed as additional potential confounders. Due to  
52 the relatively small sample size, the confidence interval for borderline significant independent  
53 variables was inspected (i.e. inspection of the lower limit confidence interval in relation to  
54 the size of effect estimate) for indications of incorrect omission from final models (40). All  
55 final models were deemed to have sufficient confidence interval coverage, based on the  
56  
57  
58  
59  
60

events-per-variable ratio (40). Using methods described by Cleves et al. (41), final models showed no violations of underlying assumptions of proportional hazards (e.g. tests based on reestimation, interaction of analysis time with the independent variables and graphically through Schoenfeld residuals) and showed appropriate model fit. Analysis was performed using STATA Statistical software (version 13.1; College Station, TX).

## Results

Table 3 presents demographic and background data as well as self-rated general health for the 53 marines who completed the baseline questionnaire (96% response rate). Good or excellent current health status was reported by >95% of respondents. Of the 53 marines starting the course, 49% joined directly from basic military training, while the other 51% came from previous service in the SwAF or from a period of civilian occupation/studies.

**Table 3.** Demographic characteristics, physical characteristics and self-rated health at baseline.

|                                                         | Mean | SD        |
|---------------------------------------------------------|------|-----------|
| Age (years)                                             | 21.8 | 3.4       |
| Body weight (kg)                                        | 80.0 | 10.1      |
| Body height (m)                                         | 1.82 | 0.07      |
| Body mass index (kg/m <sup>2</sup> )                    | 24.1 | 2.5       |
| GHQ-12 Score                                            | 1.8  | 1.6       |
| Muscular strength training; hours per week <sup>a</sup> | 4.5  | 2.7       |
| Aerobic fitness training; hours per week <sup>b</sup>   | 3.1  | 1.9       |
|                                                         | %    | 95% CI    |
| Smoking                                                 |      |           |
| No                                                      | 71.7 | 58.4-82.0 |
| Occasionally                                            | 28.3 | 18.0-42.6 |
| Yes                                                     | 0.0  | 0.0-6.8   |
| Snus (smokeless tobacco)                                |      |           |
| No                                                      | 64.2 | 50.7-75.7 |
| Occasionally                                            | 11.3 | 5.3-22.6  |
| Yes                                                     | 24.5 | 14.9-37.6 |
| Baseline testing                                        | Mean | SD        |
| Pull-ups                                                | 7.8  | 5.2       |
| Kettlebell lifts                                        |      |           |
| Average lifts                                           | 17.6 | 6.4       |
| Kettlebell, average weight (x2)                         | 29.8 | 4.1       |
|                                                         | %    | 95% CI    |

MCM-Tests, per direction;



|                    |      |           |
|--------------------|------|-----------|
| DLL-L Flex; Fail   | 19.2 | 10.8-31.9 |
| DLL-L Ext; Fail    | 34.6 | 23.2-48.2 |
| DLL-ALE Flex; Fail | 19.6 | 11.0-32.5 |
| DLL-ALE Ext; Fail  | 43.1 | 30.1-56.7 |

Note: Reported with mean and standard deviation (SD) or percentage and corresponding 95% Wilson Score confidence interval (95% CI).

<sup>a</sup>Average weekly hours of muscular strength training during previous six months (median (interquartile range) all; 4(3.5), males; 4(3.5), females 3(3)).

<sup>b</sup>Average weekly hours of aerobic fitness training during previous six months (median (interquartile range) all; 3(2), males; 3(2), females 5(3)).

### **LBP and LBP limiting work-ability**

Figures 2 and 3 present the prevalence and incidence of LBP and LBP limiting work ability, expressed per week during the marine training course. A total of 68% of the marines experienced at least one episode of LBP during the course, of whom 57% reported related limitations in their ability to work. The average LBP episode consisted of 1.6 weeks of reported pain, with 42% of the sufferers experiencing at least one recurrent episode (with an average of 2.8 weeks without reporting pain between episodes). This gave an LBP incidence rate of 13.5 (95% CI 10.4 to 17.8) episodes per 1000 person-days. For LBP limiting work ability the corresponding incidence rate was 6.3 (95% CI 4.2 to 10.0). For comparison, incidence rates based on time to first event (during the course) are presented in supplementary Table 1.

*Fig. 2 and 3 about here.*

### **Risk factors for LBP and LBP limiting work ability**

#### ***Individual physical characteristics, work- and health-related risk factors***

Tables 4 and 5 present the results from univariate, final unadjusted and final adjusted multivariable recurrent-event regression models for LBP and LBP limiting work ability during the course. *Back pain (lumbar and/or thoracic back pain)* within six months prior to the MTC and *shorter body height ( $\leq 1.80m$ )*, adjusted for the confounding effect of *sex* (LBP and LBP limiting work ability) and *previous neck shoulder pain* (LBP limiting work ability), were identified as independent risks. Additionally, *less than three sessions per week of physical training* was a significant risk for LBP that limited work ability. No interactions between the independent variables, nor with the confounders, emerged as significant in any of the models. Inspecting the 95% CI of excluded variables did not indicate any non-correct exclusion of potential risk factors. For comparison, initial multiple models for LBP and LBP limiting work ability are presented with 95% CI in supplementary Table 2.

**Table 4.** Regression analyses of individual physical characteristics, work- and health-related risk variables: univariate and multiple final adjusted† hazard ratio (HR) for low back pain (LBP) during the marine training course.

| Variable                                                     | Univariate |        |         | Final Crude Multivariable |        |         |      | Final Adjusted Multivariable <sup>a</sup> |         |      |      |        |
|--------------------------------------------------------------|------------|--------|---------|---------------------------|--------|---------|------|-------------------------------------------|---------|------|------|--------|
|                                                              | HR         | 95% CI | P value | HR                        | 95% CI | P value | HR   | 95% CI                                    | P value |      |      |        |
| <b>Physical characteristics</b>                              |            |        |         |                           |        |         |      |                                           |         |      |      |        |
| Body weight (kg)                                             | 1.01       | 0.99   | 1.03    | 0.441                     |        |         |      |                                           |         |      |      |        |
| Body Height ≤ 1.80 (m)                                       | 1.48       | 0.84   | 2.58    | 0.172                     | 1.73   | 1.03    | 2.92 | 0.040                                     | 1.98    | 1.19 | 3.29 | 0.009  |
| <b>Rated health/health history</b>                           |            |        |         |                           |        |         |      |                                           |         |      |      |        |
| Mental distress<br>(GHQ-12 Score)                            | 2.08       | 0.65   | 6.70    | 0.219                     |        |         |      |                                           |         |      |      |        |
| Back Pain; within 6 mo.<br>prior to course start             | 2.00       | 1.09   | 3.64    | 0.025                     | 2.26   | 1.27    | 4.03 | 0.006                                     | 2.47    | 1.41 | 4.31 | <0.001 |
| Hip/Knee Pain; within 6<br>mo. prior to course start         | 1.50       | 0.85   | 2.66    | 0.163                     |        |         |      |                                           |         |      |      |        |
| Neck/Shoulder Pain;<br>within 6 mo. prior to<br>course start | 1.63       | 0.91   | 2.90    | 0.098                     |        |         |      |                                           |         |      |      |        |
| <b>Work-related</b>                                          |            |        |         |                           |        |         |      |                                           |         |      |      |        |
| Current Work ability with<br>regard to best ever             | 1.69       | 0.97   | 2.94    | 0.064                     |        |         |      |                                           |         |      |      |        |
| Direct from basic military<br>training (within 3 mo.)        | 1.08       | 0.62   | 1.91    | 0.779                     |        |         |      |                                           |         |      |      |        |
| <b>Physical training habits past 6<br/>months</b>            |            |        |         |                           |        |         |      |                                           |         |      |      |        |
| Physical training;                                           |            |        |         |                           |        |         |      |                                           |         |      |      |        |

|                             |      |      |      |       |
|-----------------------------|------|------|------|-------|
| ≤ 2 sessions/week           | 1.18 | 0.53 | 2.64 | 0.692 |
| 3-4 sessions/week           | 1.00 |      |      |       |
| ≥ 5 sessions/week           | 1.29 | 0.70 | 2.37 | 0.418 |
| Muscular strength training; |      |      |      |       |
| ≤ 1 sessions/week           | 0.90 | 0.52 | 1.54 | 0.690 |
| 2-4 sessions/week           | 1.00 |      |      |       |
| ≥ 5 sessions/week           | 1.27 | 0.58 | 2.78 | 0.542 |
| Aerobic fitness training;   |      |      |      |       |
| ≤ 1 session/week            | 1.24 | 0.66 | 2.36 | 0.502 |

<sup>a</sup> Adjusted for confounding effect of sex

**Table 5.** Regression analyses of individual physical characteristics, work- and health-related risk variables: univariate and multiple final adjusted<sup>†</sup> hazard ratio (HR) for low back pain (LBP) limiting work ability during the marine training course.

| Variable                                          | Univariate |        |         | Final Crude Multivariable |        |         | Final Adjusted Multivariable <sup>a</sup> |        |         |      |      |        |
|---------------------------------------------------|------------|--------|---------|---------------------------|--------|---------|-------------------------------------------|--------|---------|------|------|--------|
|                                                   | HR         | 95% CI | P value | HR                        | 95% CI | P value | HR                                        | 95% CI | P value |      |      |        |
| <b>Physical characteristics</b>                   |            |        |         |                           |        |         |                                           |        |         |      |      |        |
| Body weight (kg)                                  | 1.00       | 0.96   | 1.04    | 0.991                     |        |         |                                           |        |         |      |      |        |
| Body Height ≤1.80 (m)                             | 2.20       | 0.96   | 5.03    | 0.062                     | 3.04   | 1.35    | 6.86                                      | 0.007  | 4.48    | 2.01 | 9.97 | <0.001 |
| <b>Rated health/health history</b>                |            |        |         |                           |        |         |                                           |        |         |      |      |        |
| Back Pain; within 6 mo. prior to course start     | 2.48       | 1.04   | 5.91    | 0.040                     | 4.47   | 1.80    | 11.11                                     | 0.001  | 3.58    | 1.44 | 8.90 | 0.006  |
| Hip/Knee Pain; within 6 mo. prior to course start | 1.15       | 0.41   | 3.23    | 0.784                     |        |         |                                           |        |         |      |      |        |
| Neck/Shoulder Pain;                               | 2.79       | 1.18   | 6.57    | 0.019                     |        |         |                                           |        |         |      |      |        |

1  
2  
3 within 6 mo. prior to  
4 course start  
5

6 **Work-related**

7 Current Work ability with 1.74 0.68 4.40 0.246  
8 regard to best ever

9 Direct from basic military 1.71 0.73 4.00 0.218  
10 training (within 3 mo.)  
11

12 **Physical training habits past 6 months**

13 Physical training;  
14

15 ≤ 2 sessions/week 1.87 0.78 4.49 0.161 3.23 1.41 7.40 0.006 2.96 1.19 7.39 0.020

16 Muscular strength training;  
17

18 ≤ 1 sessions/week 0.86 0.30 2.43 0.774

19 2-4 sessions/week 1.00

20 ≥ 5 sessions/week 1.82 0.79 4.22 0.161  
21

22 Aerobic fitness training;  
23

24 ≤ 1 sessions/week 1.41 0.63 3.15 0.408

25 <sup>a</sup> Adjusted for confounding effect of sex and neck/shoulder pain previous to course start  
26  
27  
28  
29  
30  
31  
32  
33  
34  
35  
36  
37  
38  
39  
40  
41  
42  
43  
44  
45  
46

### **Clinical tests**

Performing fewer than four pull-ups (HR 1.9, 95% CI 1.2–3.0), adjusted for confounding effect of *previous BP* and *body height*, was identified as a significant risk for LBP. However, no clinical tests were associated with LBP limiting work ability at  $p < 0.05$ . Final unadjusted and adjusted models for LBP limiting work ability are presented in Supplementary Tables 3 and 4. Sensitivity analysis based on complete cases and imputed data, with only males, caused only marginal changes in the results, with no effect on inference.

### **Work-related physical activity and occupational tasks**

Of the seven weeks of measurement, five contained sufficient wear time that could be fully used for analyses. During these weeks, an average of 16% of the working time (73 minutes per day) (not including long-distance march training, combat obstacle course or aquatic training, with a weekly average of additionally 2 hrs), was spent in physical activity of at least moderate intensity, i.e. 2020–5998 cpm, or slow-to-brisk walking (~3.8–7.5 km/h). On average, four percent of total working time was spent in physical activity of at least vigorous intensity, i.e. >5998 cpm. Sixty-one percent (44 min. per day) of the time spent in activities generating >2020 cpm was conducted wearing combat equipment ( $\geq 17.5$  kg), as illustrated in Figure 4. There was, however, a large variation across weeks in work-time wearing combat equipment that spanned from 4% to 94%, as exemplified in Figure 5.

## **Discussion**

This prospective cohort study aimed to lay the foundation for LBP prevention in Swedish marines, by evaluating the occurrence of LBP and identifying early risks for such disorders in soldiers during the marine training course. The results showed a high occurrence of LBP and consequent limitations in work ability while participating in their basic training marine-course. Marines with a history of previous back pain, those with shorter body height, or marines who performed poorly in the pull-up test were twice as likely to experience a new episode of LBP during this four-month period of physically demanding marine tasks.

This study followed 95% (n=53) of the participants enrolled in a typical marine training course in the Swedish Armed Forces (SwAF). Our cohort was homogeneous with regard to demographic characteristics and occupational tasks, which is similar to previous studies of marines (4), and may be regarded as a representative military-marine sample. While the sample size constituted the majority of the eligible Swedish marine trainees, caution has been taken to avoid over-fitting of statistical models. The effect of the relative small sample size on precisions of the estimate was here reflected in the somewhat wide confidence intervals. Furthermore, given the heightened risk of non-identification of a true risk factor, omission of borderline significant risks, i.e. not reaching significance in the present study, should not exclude them for further investigation in other similar cohorts in the military community. The loss of power could have been avoided by including data from future training courses (i.e. accumulating a larger sample), other military courses, or by prolonging the follow up period (i.e. including time after the course) (42). For the present study's aims, however, we believe it

1  
2  
3 was more important to emphasize sample homogeneity and specific work-related exposure, as  
4 we believe this to be one of the most challenging factors to control for in studies of military  
5 populations.  
6

7  
8 We believe this study to be the first to use a repeated time-to-event regression method, with  
9 discontinued risk intervals, for LBP in a military population. This method may – we believe –  
10 better reflect the recurrent nature of LBP and make more use of the collected data than the  
11 conversional methods using time-to-first event. The definitions of a new event vary between  
12 studies (43), but a pain-free period of one week was considered sufficient for an additional  
13 event to be defined as either a new event or symptom “flare up” (44) from a previous event.  
14 Given that this definition does not distinguish between a new “uniquely” first event or  
15 symptom “flare up” from a recurrent chain of events, potential differences in the mechanism  
16 for new and recurrent pain could not be further disentangled in this study. Regarding our  
17 baseline testing, marines that were injured (n=9) or ill (n=7) were not allowed to perform the  
18 “max effort” tests, because of the risk of worsening their health. However, analysis based on  
19 complete cases, as well as on imputations including only males, did not change the results,  
20 indicating an appropriate inference from the present results. Due to none of the female  
21 marines conducting the two “max” tests of pull-ups or kettle-bell lifts, these results should  
22 only be extended to males.  
23  
24  
25  
26  
27

28  
29 Our results show a relatively high incidence of LBP in this cohort of young marines, with  
30 more than two thirds experiencing at least one LBP episode during the course. This is almost  
31 twice the reported six-month LBP prevalence for active duty SwAF marines (4), more than  
32 twice the LBP incidence in the British combat infantryman’s course (45), and higher than the  
33 total musculoskeletal injury incidence in other military training cohorts (46-48). This  
34 difference in pain occurrence may partly be explained by differences in the length of follow-  
35 up periods (49), or how LBP was defined (50). However, the recall period in this study was  
36 relatively short, and as such should limit the risk of recall bias. Given that three of five  
37 marines experiencing LBP also reported related limitations in work ability, it is likely that  
38 LBP reduced the intended goals with the course, and this may have future negative effects on  
39 the operational readiness of SwAF marine units.  
40  
41  
42  
43  
44  
45

46  
47 Although previous musculoskeletal disorders are considered to be the strongest predictor for  
48 new musculoskeletal disorders in military populations (15, 47, 51, 52), it is not clear if such  
49 previous pain-episodes are anatomically region-specific in their prediction. This might not  
50 make a substantial difference in general primary prevention policy decisions, but the present  
51 findings could – we believe – help clinicians to be more specific in their selection of suitable  
52 secondary preventive measures for LBP. However, until the pathophysiological pathways  
53 between prior and future pain episodes are further disentangled, this does not inform the  
54 clinician what specific deficiencies to address. As such, the current use is limited to  
55 identifying persons at risk of LBP (53); marines at risk should be considered for further  
56 clinical examination and secondary preventive action. The same goes for marines with a body  
57 height of  $\leq 1.80\text{m}$ , here identified as a risk for both LBP and LBP limiting work ability. While  
58  
59  
60

1  
2  
3 risks associated with body height are in line with our previous results (4), it is not likely that a  
4 short body height per se constitutes the actual risk, it could potentially represent an interaction  
5 with equipment worn or specific work tasks conducted.  
6  
7

8 The present results also highlight the need for regular physical training ( $\geq 3$  sessions/week)  
9 for military personnel planning to attend the marine training course. This is in line with  
10 recommendations for general health in the civilian population (54), and should certainly be  
11 stressed for this physically active military community as well. Here, inferior upper-body  
12 strength, as tested by the pull-up test, seems to have played a role in back pain aetiology. This  
13 test, used in different forms in many military physical assessments (14, 55), is considered a  
14 relevant test of the ability to navigate over obstacles (14), but also as a proxy for general  
15 upper-body strength and muscle endurance (56). The test primarily challenges the back,  
16 shoulder and arm muscles, but also to a moderate extent the external oblique and erector  
17 spinae muscles (57). As such, it could represent a valid test for marines as upper body  
18 strength is crucial for load carriage (58). No female marines conducted these tests, therefore  
19 future cut-offs need to be validated for them. Neither the kettlebell lifts nor any of the  
20 movement-control tests predicted future LBP, however, “core-strengthening exercises” were  
21 already conducted as part of the marines’ daily calisthenics in this sample, potentially  
22 preventing such deficits early in the course. Still, the results tally with our previously reported  
23 results from active duty marines, where these tests, analysed as overall pass/fail, failed to  
24 predict back pain within a six- and 12-month event window (15). While the present study  
25 aimed at identifying early risks for LBP, the sample size limited the exploration of potential  
26 effect measures modification in the final models to two-way statistical interactions. These  
27 analyses did, however, not provide any evidence of previous back pain affecting the amount  
28 of physical training and upper body strength in relation to a new back pain episode. The  
29 direction of temporality could however only be addressed for the six months preceding the  
30 course start. Still, physical training is recommended as primary (59-64), secondary (59, 60,  
31 62, 64), and tertiary (59-64) preventive actions for back pain in both general populations and  
32 occupational settings. This highlights the potential role of physical training as a preventive  
33 action against future back pain episodes for marines displaying these identified risks.  
34  
35  
36  
37  
38  
39  
40  
41  
42  
43  
44

45 While the physical demands of the course could be one reason for high LBP incidence, more  
46 than eighty percent of the work time measured was spent at low levels of ambulation, i.e.  
47 producing less than 2020 cpm. These results were similar to, or lower than, ambulatory  
48 movements reported for basic military training courses (65-67). However, in comparison with  
49 the US basic military training, where loads of no more than 4.5 kg were carried for 80% of the  
50 time (65), the marines in the present study carried combat equipment weighing  $>17.5$  kg for  
51 more than half of the measured work time. In addition, the maximum weight of equipment  
52 worn on certain occasions, such as during loaded marches, can at times be more than twice  
53 that. Considering that both body-worn equipment and load carriage has been linked to LBP in  
54 deployed military personnel (12), this may possibly relate to the high LBP incidence in the  
55 present study. Furthermore, it highlights the need to consider load carriage when examining  
56 the association between ambulatory movement and LBP in the military context.  
57  
58  
59  
60

1  
2  
3  
4  
5 In summary, LBP and related limitations in work ability are common during the four-month  
6 physically demanding marine training course, and may affect the future operational readiness  
7 of marine units. Since previous LBP episodes are the most consistent risk for further LBP,  
8 marines entering the course with a history of LBP should receive tailor-made secondary  
9 preventive actions. Furthermore, marines with few weekly sessions of physical training, or  
10 with insufficient upper body strength, should be considered for targeted physical training.  
11 Further investigation on the role of body height on LBP is needed, including its relation to  
12 body-worn equipment, before it can be effectively used in LBP prevention. In addition, while  
13 ambulation was low for parts of the course, combat equipment was carried for more than half  
14 of the work time, further indicating the need to consider the role of body-worn equipment in  
15 LBP aetiology for this population.  
16  
17  
18  
19  
20  
21  
22  
23  
24

## 25 **Acknowledgements**

26  
27  
28 Funding from the Swedish Armed Forces PhD program and financial support from the  
29 Swedish Society for Military Medical Officers, Ann-Marie och Ragnar Hemborgs  
30 Minnesfond and Land-och Sjöfonden is gratefully acknowledged. In addition, we would like  
31 to thank the 1st Marine Regiment of the Swedish Armed Forces for overall support. The  
32 authors would also like to thank Jacob Sejersen and Kjell Norman for valuable support during  
33 design of the study and during data collection.  
34  
35  
36  
37  
38

## 39 **Contributorship statement**

40  
41 AM was the main writer of the paper and participated in the conception and design of the  
42 study, and acquired, analysed and interpreted the data. HL and HN participated in the  
43 conception and design of the study, planning of the analysis, interpretation of the data as well  
44 as the writing and revising of the paper. MD was involved in the design and planning of the  
45 study, as well as interpreting the data and revising the paper. As senior project researcher,  
46 BOÄ participated in the conception and design of the study, planning the analysis and  
47 interpretation of the data, and writing and revising the paper. All the authors have read and  
48 approved the final manuscript.  
49  
50  
51  
52  
53  
54

## 55 **Competing interests**

56  
57 Dr. Monnier reports grants from The Swedish Society for Military Medical Officers, grants  
58 from Ann-Mari och Ragnar Hemborgs Minnesfond, grants from Stiftelsen fond till minne av  
59  
60



1  
2  
3 ömsesidiga Olycksfallsförsäkringsbolaget Land och Sjö, during the conduct of the study; Dr.  
4 Larsson has nothing to disclose. Dr. Nero has nothing to disclose. Dr. Djupsjöbacka has  
5 nothing to disclose. Dr. Äng has nothing to disclose.  
6  
7  
8  
9

## 10 **Funding**

11  
12  
13 Funding was received from the Swedish Armed Forces PhD program, the Swedish Society for  
14 Military Medical Officers, Ann-Marie och Ragnar Hemborgs Minnesfond and Land-och  
15 Sjöfonden. The funding organisations had no authority over or input into any part of the  
16 study.  
17  
18  
19  
20

## 21 **Data sharing statement**

22  
23  
24 No additional data are available.  
25  
26  
27  
28  
29  
30  
31  
32  
33  
34  
35  
36  
37  
38  
39  
40  
41  
42  
43  
44  
45  
46  
47  
48  
49  
50  
51  
52  
53  
54  
55  
56  
57  
58  
59  
60

## References

1. Global, regional, and national incidence, prevalence, and years lived with disability for 301 acute and chronic diseases and injuries in 188 countries, 1990-2013: a systematic analysis for the Global Burden of Disease Study 2013. *Lancet*. 2015;386(9995):743-800.
2. Hoy D, Bain C, Williams G, March L, Brooks P, Blyth F, et al. A systematic review of the global prevalence of low back pain. *Arthritis Rheum*. 2012;64(6):2028-37.
3. Katz JN. Lumbar disc disorders and low-back pain: socioeconomic factors and consequences. *J Bone Joint Surg Am*. 2006;88(suppl 2):21-4.
4. Monnier A, Larsson H, Djupsjöbacka M, Brodin L-Å, Ång BO. Musculoskeletal pain and limitations in work ability in Swedish marines: a cross-sectional survey of prevalence and associated factors. *BMJ Open*. 2015;5(10):e007943.
5. Hayton J. Reducing medical downgrading in a high readiness Royal Marine unit. *JR Army Med Corps*. 2004;150:164-7.
6. Pengel LH, Herbert RD, Maher CG, Refshauge KM. Acute low back pain: systematic review of its prognosis. *BMJ*. 2003;327(7410):323.
7. O'Connor F. Injuries during Marine Corps officer basic training. *Mil Med*. 2000;165(7):515.
8. Trone DW, Cipriani DJ, Raman R, Wingard DL, Shaffer RA, Macera CA. Self-Reported Smoking and Musculoskeletal Overuse Injury Among Male and Female US Marine Corps Recruits. *Mil Med*. 2014;179(7):735-43.
9. Papageorgiou AC, Croft PR, Thomas E, Ferry S, Jayson M, Silman AJ. Influence of previous pain experience on the episode incidence of low back pain: results from the South Manchester Back Pain Study. *Pain*. 1996;66(2):181-5.
10. Adams MA, Mannion AF, Dolan P. Personal risk factors for first-time low back pain. *Spine*. 1999;24(23):2497.
11. Feyer A-M, Herbison P, Williamson AM, de Silva I, Mandryk J, Hendrie L, et al. The role of physical and psychological factors in occupational low back pain: a prospective cohort study. *Occup Environ Med*. 2000;57(2):116-20.
12. Roy TC, Lopez HP, Piva SR. Loads worn by soldiers predict episodes of low back pain during deployment to Afghanistan. *Spine*. 2013;38(15):1310-7.
13. Taanila H. Musculoskeletal disorders in male Finnish conscripts: Importance of physical fitness as a risk factor, and effectiveness of neuromuscular exercise and counseling in the prevention of acute injuries, and low back pain and disability. (Doctoral dissertation, University of Tampere, School of Medicine, UKK Institute, Centre for Military Medicine Finland, 2013). Retrieved from <http://urn.fi/URN:ISBN:978-951-44-9069-9>
14. Larsson H, Tegern M, Monnier A, Skoglund J, Helander C, Persson E, et al. Content Validity Index and Intra- and Inter-Rater Reliability of a New Muscle Strength/Endurance Test Battery for Swedish Soldiers. *PloS one*. 2015;10(7):e0132185.
15. Monnier A, Djupsjöbacka M, Larsson H, Norman K, Ång BO. Risk factors for back pain in marines; a prospective cohort study. *BMC Musculoskelet Disord*. 2016;17(1):319.
16. Ilmarinen J. The work ability index (WAI). *Occup Med*. 2007;57(2):160-.
17. Goldberg DP, Gater R, Sartorius N, Ustun T, Piccinelli M, Gureje O, et al. The validity of two versions of the GHQ in the WHO study of mental illness in general health care. *Psychol Med*. 1997;27(01):191-7.
18. Kuorinka I, Jonsson B, Kilbom A, Vinterberg H, Biering-Sørensen F, Andersson G, et al. Standardised Nordic questionnaires for the analysis of musculoskeletal symptoms. *Appl Ergon*. 1987;18(3):233-7.

19. DP Goldberg, P Williams. *A User's Guide to the General Health Questionnaire*. 3ed, 1988. NFER, London, UK.
20. Makowska Z, Merecz D, Moscicka A, Kolasa W. The validity of general health questionnaires, GHQ-12 and GHQ-28, in mental health studies of working people. *Int J Occup Med Environ Health*. 2002;15(4):353-62.
21. Fredriksson K, Alfredsson L, Ahlberg G, Josephson M, Kilbom Å, Wigaeus Hjelm E, et al. Work environment and neck and shoulder pain: the influence of exposure time. Results from a population based case-control study. *Occup Environ Med*. 2002;59(3):182-8.
22. Vingård E, Alfredsson L, Hagberg M, Kilbom Å, Theorell T, Waldenström M, et al. To What Extent Do Current and Past Physical and Psychosocial Occupational Factors Explain Care-Seeking for Low Back Pain in a Working Population?: Results from the Musculoskeletal Intervention Center-Norrköping Study. *Spine*. 2000;25(4):493-500.
23. Monnier A, Heuer J, Norman K, Äng BO. Inter-and intra-observer reliability of clinical movement-control tests for marines. *BMC Musculoskelet Disord*. 2012;13(1):263.
24. Larsson H, Larsson M, sterberg H, Harms-Ringdahl K. Screening Tests Detect Knee Pain and Predict Discharge from Military Service. *Mil Med*. 2008;173(3):259-65.
25. Larsson H, Harms-Ringdahl K. A lower-limb functional capacity test for enlistment into Swedish Armed Forces ranger units. *Mil Med*. 2006;171(11):1065-70.
26. Comerford MJ. *The Performance Matrix performance Profiling, risk assessment & training strategies for injury prevention & performance enhancement*. UK: KC International / Movement Performance Solutions; 2008.
27. Hoy D, March L, Brooks P, Woolf A, Blyth F, Vos T, et al. Measuring the global burden of low back pain. *Best Pract Res Clin Rheumatol*. 2010;24(2):155-65.
28. Hosmer DW, Lemeshow S, May S. *Applied Survival Analysis: Regression Modelling of Time to Event Data*. 2nd ed., 2008. Hoboken: John Wiley & Sons.
29. Vittinghoff E, Glidden D, Shiboski S, McCulloch C. *Regression methods in biostatistics: linear, logistic, survival, and repeated measures models*. 2005. New York: Springer.
30. Rubin DB. Multiple imputation after 18+ years. *J Am Stat Assoc*. 1996;91(434):473-89.
31. Brown LD, Cai TT, DasGupta A. Interval estimation for a binomial proportion. *Statist Sci*. 2001:101-17.
32. Miller RG. The jackknife-a review. *Biometrika*. 1974;61(1):1-15.
33. Choi L, Liu Z, Matthews CE, Buchowski MS. Validation of accelerometer wear and nonwear time classification algorithm. *Med Sci Sports Exerc*. 2011;43(2):357.
34. Troiano RP, Berrigan D, Dodd KW, Masse LC, Tilert T, McDowell M. Physical activity in the United States measured by accelerometer. *Med Sci Sports Exerc*. 2008;40(1):181.
35. Nichols JF, Morgan CG, Chabot LE, Sallis JF, Calfas KJ. Assessment of physical activity with the Computer Science and Applications, Inc., accelerometer: laboratory versus field validation. *Res Q Exerc Sport*. 2000;71(1):36-43.
36. Matthew CE. Calibration of accelerometer output for adults. *Med Sci Sports Exerc*. 2005;37(11 Suppl):S512-22.
37. Andersen PK, Gill RD. Cox's regression model for counting processes: a large sample study. *Ann Stat*. 1982:1100-20.
38. Guo Z, Gill TM, Allore HG. Modeling repeated time-to-event health conditions with discontinuous risk intervals: an example of a longitudinal study of functional disability among older persons. *Methods Inf Med*. 2008;47(2):107.
39. Lin DY, Wei L-J. The robust inference for the Cox proportional hazards model. *J Am Stat Assoc*. 1989;84(408):1074-8.

- 1
- 2
- 3
40. Vittinghoff E, McCulloch CE. Relaxing the rule of ten events per variable in logistic and Cox regression. *Am J Epidemiol.* 2007;165(6):710-8.
41. Cleves M, Gould W, Gutierrez R, Marchenko Y. An introduction to survival analysis using Stata. 2010, 3ed ed., College Station: Stata press.
42. Ingel K, J, Jahn-Eimermacher A. Sample - size calculation and reestimation for a semiparametric analysis of recurrent event data taking robust standard errors into account. *Biom J.* 2014;56(4):631-48.
43. Stanton TR, Latimer J, Maher CG, Hancock MJ. How do we define the condition 'recurrent low back pain'? A systematic review. *Eur Spine J.* 2010;19(4):533-9.
44. Young AE, Wasiak R, Phillips L, Gross DP. Workers' perspectives on low back pain recurrence: "It comes and goes and comes and goes, but it's always there". *PAIN.* 2011;152(1):204-11.
45. Sharma J, Greeves JP, Byers M, Bennett AN, Spears IR. Musculoskeletal injuries in British Army recruits: a prospective study of diagnosis-specific incidence and rehabilitation times. *BMC Musculoskelet Disord.* 2015;16(1):1.
46. Taanila H, Suni JH, Kannus P, Pihlajamäki H, Ruohola J-P, Viskari J, et al. Risk factors of acute and overuse musculoskeletal injuries among young conscripts: a population-based cohort study. *BMC Musculoskelet Disord.* 2015;16(1):1.
47. Knapik JJ, Graham B, Cobbs J, Thompson D, Steelman R, Jones BH. A prospective investigation of injury incidence and injury risk factors among Army recruits in military police training. *BMC Musculoskelet Disord.* 2013;14(1):32.
48. Hollingsworth D. The prevalence and impact of musculoskeletal injuries during a pre-deployment workup cycle: survey of a Marine Corps special operations company. *J Spec Oper Med.* 2009;9(4):11.
49. Carragee EJ, Cohen SP. Lifetime Asymptomatic for Back Pain: The Validity of Self-report Measures in Soldiers. *Spine.* 2009;34(9):978-83.
50. Thiese MS, Hegmann KT, Wood EM, Garg A, Moore JS, Kapellusch J, et al. Prevalence of low back pain by anatomic location and intensity in an occupational population. *BMC Musculoskelet Disord.* 2014;15(1):1.
51. Mattila VM, Sahi T, Jormanainen V, Pihlajamäki H. Low back pain and its risk indicators: a survey of 7,040 Finnish male conscripts. *Eur Spine J.* 2008;17(1):64-9.
52. Knapik JJ, Graham B, Cobbs J, Thompson D, Steelman R, Jones BH. A prospective investigation of injury incidence and risk factors among army recruits in combat engineer training. *J Occup Med Toxicol.* 2013;8(1):5.
53. Leboeuf-Yde C. Back pain—individual and genetic factors. *J Electromyogr Kinesiol.* 2004;14(1):129-33.
54. Garber CE, Blissmer B, Deschenes MR, Franklin BA, Lamonte MJ, Lee I-M, et al. American College of Sports Medicine position stand. Quantity and quality of exercise for developing and maintaining cardiorespiratory, musculoskeletal, and neuromotor fitness in apparently healthy adults: guidance for prescribing exercise. *Med Sci Sports Exerc.* 2011;43(7):1334-59.
55. Headquarters Marine Corps. Marine Corps physical fitness test and body composition program manual. Washington, DC. (2002).
56. Vickers Jr RR. Construct Validity of Physical Fitness Tests. Naval Health Research Center, San Diego 2011. Report. No. 11-52.
57. Youdas JW, Amundson CL, Cicero KS, Hahn JJ, Harezlak DT, Hollman JH. Surface electromyographic activation patterns and elbow joint motion during a pull-up, chin-up, or perfect-pullup™ rotational exercise. *J Strength Cond Res.* 2010;24(12):3404-14.

- 1  
2  
3 58. Knapik JJ, Harman EA, Steelman RA, Graham BS. A systematic review of the  
4 effects of physical training on load carriage performance. *J Strength Cond Res.*  
5 2012;26(2):585-97.  
6  
7 59. Burton AK, Balagué F, Cardon G, Eriksen HR, Henrotin Y, Lahad A, et al.  
8 Chapter 2 European guidelines for prevention in low back pain. *Eur Spine J.* 2006;15:s136-  
9 s68.  
10 60. Burton AK. How to prevent low back pain. *Best Pract Res Clin Rheumatol.*  
11 2005;19(4):541-55.  
12 61. Bigos SJ, Holland J, Holland C, Webster JS, Battie M, Malmgren JA. High-  
13 quality controlled trials on preventing episodes of back problems: systematic literature review  
14 in working-age adults. *Spine J.* 2009;9(2):147-68.  
15 62. Schaafsma FG, Anema JR, van der Beek AJ. Back pain: prevention and  
16 management in the workplace. *Best Prac Res Clin Rheumatol.* 2015;29(3):483-94.  
17 63. Steffens D, Maher CG, Pereira LS, Stevens ML, Oliveira VC, Chapple M, et al.  
18 Prevention of low back pain: a systematic review and meta-analysis. *JAMA Intern med.*  
19 2016;176(2):199-208.  
20 64. Shiri R, Coggon D, Falah-Hassani K. Exercise for the prevention of low back  
21 pain: systematic review and meta-analysis of controlled trials. *Am J Epidemiol.*  
22 2017;187(5):1093-101.  
23 65. Simpson K, Redmond JE, Cohen BS, Hendrickson NR, Spiering BA, Steelman  
24 R, et al. Quantification of physical activity performed during US Army Basic Combat  
25 Training. *US Army Med Dep J.* 2013;4:55-65.  
26 66. Roos L, Boesch M, Sefidan S, Frey F, Mäder U, Annen H, et al. Adapted  
27 marching distances and physical training decrease recruits' injuries and attrition. *Mil Med.*  
28 2015;180(3):329-36.  
29 67. Wyss T, Roos L, Hofstetter M-C, Frey F, Mäder U. Impact of training patterns  
30 on injury incidences in 12 Swiss Army basic military training schools. *Mil Med.*  
31 2014;179(1):49-55.  
32  
33  
34  
35  
36  
37  
38  
39  
40  
41  
42  
43  
44  
45  
46  
47  
48  
49  
50  
51  
52  
53  
54  
55  
56  
57  
58  
59  
60

## Figures

**Figure 1.** Recruitment and measurement procedure, number of subjects included, excluded and weekly follow ups (wk.) during the marine training course. The main focus of the different phases of the course is given together with longer field exercises and leave periods.

<sup>a</sup>One subject excluded from analysis based on LBP incidence, due to LBP at baseline that lasted for more than additional five course weeks. <sup>b</sup>DLL&L; Double Leg Lift & Lower test. <sup>c</sup>DLL&ALE; Double Leg Lift & Alternate Leg Extension.

**Figure 2.** Weekly (Wk.) prevalence of LBP and LBP limiting work ability during the marine training course, reported as weekly proportion (percent) of cohort under study. Error bars indicate 95% confidence interval.

**Figure 3.** Weekly (Wk.) incidence of LBP and LBP limiting work ability during the marine training course, reported as weekly proportion (percent) of new pain episodes of marines at risk for a new event. Error bars indicate 95% confidence interval.

**Figure 4.** Proportions of work time spent in occupational physical activity generating more and less than 2020 counts per minute; in total, with, and without combat load carriage ( $\geq 17.5$  kg). Work time is based on an average weekly work-time of 38 hrs (not including long distance march training, combat obstacle course or aquatic training, constituting a weekly average of an additional 2 hrs).

**Figure 5.** Proportions of work time in occupational physical activity reported per category of physical intensity (42), for total work time and time with/without combat load carriage ( $\geq 17.5$  Kg) for three consecutive course weeks with different learning objectives; “*combat training (course week 6)*”, “*orientation and communication (course week 7)*” and “*advanced combat training (course week 8)*”.



Recruitment and measurement procedure, number of subjects included, excluded and weekly follow ups (wk.) during the marine training course. The main focus of the different phases of the course is given together with longer field exercises and leave periods. <sup>a</sup>One subject excluded from analysis based on LBP incidence, due to LBP at baseline that lasted for more than additional five course weeks. <sup>b</sup>DLL&L; Double Leg Lift & Lower test. <sup>c</sup>DLL&ALE; Double Leg Lift & Alternate Leg Extension.

77x28mm (600 x 600 DPI)

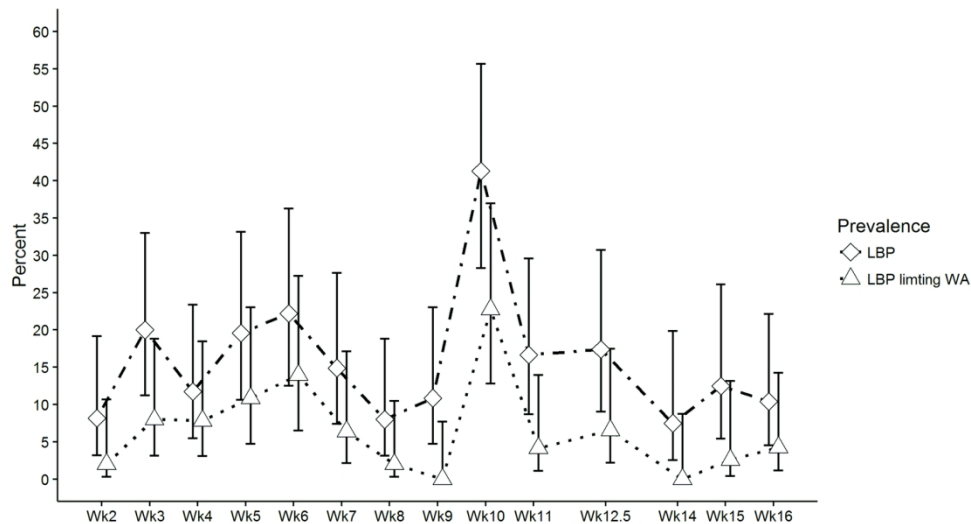

Figure 2. Weekly (Wk.) prevalence of LBP and LBP limiting work ability during the marine training course, reported as weekly proportion (percent) of cohort under study. Error bars indicate 95% confidence interval.

79x44mm (600 x 600 DPI)



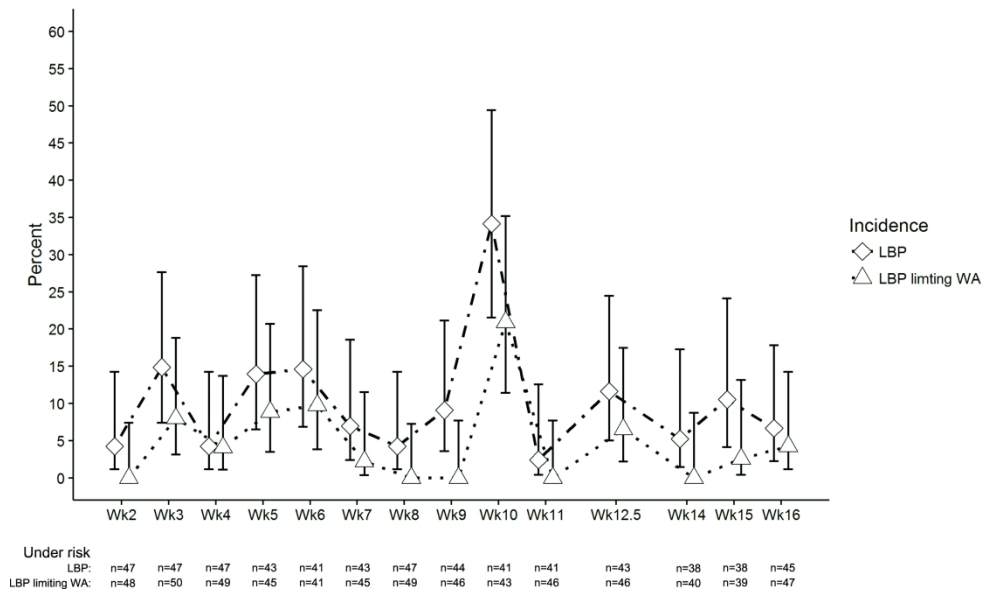

Figure 3. Weekly (Wk.) incidence of LBP and LBP limiting work ability during the marine training course, reported as weekly proportion (percent) of new pain episodes of marines at risk for a new event. Error bars indicate 95% confidence interval.

144x84mm (600 x 600 DPI)



Figure 4. Proportions of work time spent in occupational physical activity generating more and less than 2020 counts per minute; in total, with, and without combat load carriage ( $\geq 17.5$  kg). Work time is based on an average weekly work-time of 38 hrs (not including long distance march training, combat obstacle course or aquatic training, constituting a weekly average of an additional 2 hrs).

110x109mm (600 x 600 DPI)



Figure 5. Proportions of work time in occupational physical activity reported per category of physical intensity (42), for total work time and time with/without combat load carriage ( $\geq 17.5\text{Kg}$ ) for three consecutive course weeks with different learning objectives; "combat training (course week 6)", "orientation and communication (course week 7)" and "advanced combat training (course week 8)".

65x33mm (600 x 600 DPI)

# A longitudinal observational study of back pain incidence, risk factors, and occupational physical activity in Swedish marine trainees

## Supplementary Files

**Supplementary Table 1.** Incidence rate (IR) based on time to first LBP, and LBP limiting work-ability, episode during the marine training course.

|                      | LBP              |      |          | LBP limiting work ability |     |         |
|----------------------|------------------|------|----------|---------------------------|-----|---------|
|                      | Time at risk     | IR   | 95%CI    | Time at risk              | IR  | 95%CI   |
| Per 100 person-weeks | 398 person weeks | 9.0  | 6.5-12.5 | 539 person weeks          | 3.9 | 2.5-6.0 |
| Per 1000 person-days | 2786 person days | 12.9 | 9.3-17.9 | 3773 person days          | 5.6 | 3.6-8.5 |

**Supplementary Table 2.** Regression analyses of individual physical characteristics, work- and health-related risk variables: initial multiple hazard ratio (HR) for low back pain (LBP) and LBP limiting work ability during the marine training course.

| Variable                                               | LBP     |               |         | LBP limiting work ability |               |         |      |       |
|--------------------------------------------------------|---------|---------------|---------|---------------------------|---------------|---------|------|-------|
|                                                        | Initial | Multivariable |         | Initial                   | Multivariable |         |      |       |
|                                                        | HR      | 95% CI        | P value | HR                        | 95% CI        | P value |      |       |
| <b>Physical characteristics</b>                        |         |               |         |                           |               |         |      |       |
| Body Height $\leq 1.80$ (m)                            | 1.69    | 1.02          | 2.79    | 0.040                     | 2.90          | 1.31    | 6.43 | 0.009 |
| <b>Rated health/health history</b>                     |         |               |         |                           |               |         |      |       |
| Back Pain; within 6 mo. prior to course start          | 1.61    | 0.85          | 3.05    | 0.145                     | 2.42          | 0.89    | 6.55 | 0.082 |
| Hip/Knee Pain; within 6 mo. prior to course start      | 1.30    | 0.75          | 2.27    | 0.350                     |               |         |      |       |
| Neck/Shoulder Pain; within 6 mo. prior to course start | 1.25    | 0.68          | 2.35    | 0.483                     | 2.35          | 0.76    | 7.21 | 0.136 |
| <b>Work-related</b>                                    |         |               |         |                           |               |         |      |       |
| Current Work ability with regard to best ever          | 1.48    | 0.86          | 2.54    | 0.152                     |               |         |      |       |
| <b>Physical training habits past 6months</b>           |         |               |         |                           |               |         |      |       |
| Physical training;<br>$\leq 2$ sessions/week           |         |               |         |                           | 3.16          | 1.23    | 8.13 | 0.017 |
| Muscular strength training;<br>$\leq 1$ sessions/week  |         |               |         |                           | 0.44          | 0.12    | 1.61 | 0.215 |
| 2-4 sessions/week                                      |         |               |         |                           |               |         |      |       |
| $\geq 5$ sessions/week                                 |         |               |         |                           | 1.27          | 0.45    | 3.54 | 0.649 |

**Supplementary Table 3.** Regression analyses of clinical tests: univariate and multiple final adjusted<sup>†</sup> hazard ratio (HR) for low back pain during the marine training course.

|                                                   | Univariate |        |         | Final Adjusted Model <sup>a</sup> |        |         |      |       |
|---------------------------------------------------|------------|--------|---------|-----------------------------------|--------|---------|------|-------|
|                                                   | HR         | 95% CI | P value | HR                                | 95% CI | P value |      |       |
| <b>Physical/clinical tests</b>                    |            |        |         |                                   |        |         |      |       |
| Kettlebell lifts; kg*rep<br>≤760 (lowest tertile) | 1.48       | 0.82   | 2.67    | 0.198                             |        |         |      |       |
| <b>Sensitivity analysis</b>                       |            |        |         |                                   |        |         |      |       |
| CC (i.e. only male)                               | 1.44       | 0.76   | 2.7     | 0.261                             |        |         |      |       |
| Imputed (only male)                               | 1.48       | 0.75   | 2.91    | 0.256                             |        |         |      |       |
| Pull-ups<br>≤ 3                                   | 1.99       | 1.11   | 3.56    | 0.020                             | 1.87   | 1.17    | 3.01 | 0.009 |
| <b>Sensitivity analysis</b>                       |            |        |         |                                   |        |         |      |       |
| CC (i.e. only male)                               | 2.00       | 1.10   | 3.66    | 0.025                             | 1.82   | 1.16    | 2.88 | 0.009 |
| Imputed (only male)                               | 1.94       | 1.06   | 3.54    | 0.032                             | 1.81   | 1.13    | 2.91 | 0.014 |
| <b>MCM-Tests,<br/>direction specific;</b>         |            |        |         |                                   |        |         |      |       |
| DLL-L Flex; <i>Fail</i>                           | 0.82       | 0.39   | 1.75    | 0.613                             |        |         |      |       |
| DLL-L Ext; <i>Fail</i>                            | 0.82       | 0.47   | 1.46    | 0.508                             |        |         |      |       |
| DLL-ALE Flex; <i>Fail</i>                         | 0.71       | 0.32   | 1.56    | 0.388                             |        |         |      |       |
| DLL-ALE Ext; <i>Fail</i>                          | 1.35       | 0.76   | 2.40    | 0.310                             |        |         |      |       |

<sup>a</sup>Adjusted for prior back pain and body height

Abbreviations; CC; complete cases, DLL-L Flex; Double leg lift-lower lumbar flexion-control, DLL-L Ext; Double leg lift-lower lumbar extension-control, DLL-ALE Flex; Double leg lift-alternate leg extension lumbar flexion-control, DLL-L Ext; Double leg lift-alternate leg extension lumbar extension-control.

**Supplementary Table 4.** Regression analyses of clinical tests: univariate hazard ratio (HR) for low back pain limiting work ability during the marine training course.

|                                       | HR   | 95% CI    | P value |
|---------------------------------------|------|-----------|---------|
| <b>Physical/clinical tests</b>        |      |           |         |
| Kettlebell lifts; kg*rep              |      |           |         |
| $\leq 760$ (lowest tertile)           | 1.02 | 0.67 1.54 | 0.923   |
| <b>Sensitivity analysis</b>           |      |           |         |
| Complete cases (i.e. only male)       | 1.10 | 0.31 3.92 | 0.884   |
| Imputed (only male)                   | 1.12 | 0.37 3.39 | 0.834   |
| Pull-ups                              |      |           |         |
| $\leq 3$                              | 1.02 | 0.75 1.38 | 0.912   |
| <b>Sensitivity analysis</b>           |      |           |         |
| Complete cases (i.e. only male)       | 1.23 | 0.42 3.64 | 0.709   |
| Imputed (only male)                   | 1.29 | 0.46 3.60 | 0.631   |
| <b>MCM-Tests, direction specific;</b> |      |           |         |
| DLL-L Flex; <i>Fail</i>               | 0.71 | 0.21 2.43 | 0.587   |
| DLL-L Ext; <i>Fail</i>                | 0.85 | 0.35 2.06 | 0.715   |
| DLL-ALE Flex; <i>Fail</i>             | 0.76 | 0.23 2.54 | 0.650   |
| DLL-ALE Ext; <i>Fail</i>              | 0.71 | 0.29 1.73 | 0.452   |

Abbreviations; DLL-L Flex; Double leg lift-lower lumbar flexion-control, DLL-L Ext; Double leg lift-lower lumbar extension-control, DLL-ALE Flex; Double leg lift-alternate leg extension lumbar flexion-control, DLL-L Ext; Double leg lift-alternate leg extension lumbar extension-control.

**STROBE 2007 (v4) Statement—Checklist of items that should be included in reports of *cohort studies***

| Section/Topic                | Item # | Recommendation                                                                                                                                                                       | Reported on page #        |
|------------------------------|--------|--------------------------------------------------------------------------------------------------------------------------------------------------------------------------------------|---------------------------|
| Title and abstract           | 1      | (a) Indicate the study's design with a commonly used term in the title or the abstract                                                                                               | Page 1 and 2              |
|                              |        | (b) Provide in the abstract an informative and balanced summary of what was done and what was found                                                                                  | Page 2                    |
| <b>Introduction</b>          |        |                                                                                                                                                                                      |                           |
| Background/rationale         | 2      | Explain the scientific background and rationale for the investigation being reported                                                                                                 | Page 4                    |
| Objectives                   | 3      | State specific objectives, including any prespecified hypotheses                                                                                                                     | Page 4-5                  |
| <b>Methods</b>               |        |                                                                                                                                                                                      |                           |
| Study design                 | 4      | Present key elements of study design early in the paper                                                                                                                              | Page 5                    |
| Setting                      | 5      | Describe the setting, locations, and relevant dates, including periods of recruitment, exposure, follow-up, and data collection                                                      | Page 5 and Fig.1          |
| Participants                 | 6      | (a) Give the eligibility criteria, and the sources and methods of selection of participants. Describe methods of follow-up                                                           | Page 5 and 13             |
|                              |        | (b) For matched studies, give matching criteria and number of exposed and unexposed                                                                                                  | Not applicable            |
| Variables                    | 7      | Clearly define all outcomes, exposures, predictors, potential confounders, and effect modifiers. Give diagnostic criteria, if applicable                                             | Pages 13-14 and Table 1-2 |
| Data sources/<br>measurement | 8*     | For each variable of interest, give sources of data and details of methods of assessment (measurement). Describe comparability of assessment methods if there is more than one group | Table 1-2                 |
| Bias                         | 9      | Describe any efforts to address potential sources of bias                                                                                                                            | Page 14-16                |
| Study size                   | 10     | Explain how the study size was arrived at                                                                                                                                            | Page 5                    |
| Quantitative variables       | 11     | Explain how quantitative variables were handled in the analyses. If applicable, describe which groupings were chosen and why                                                         | Table 1-2                 |
| Statistical methods          | 12     | (a) Describe all statistical methods, including those used to control for confounding                                                                                                | Page 14-16                |
|                              |        | (b) Describe any methods used to examine subgroups and interactions                                                                                                                  | Page 15-16                |
|                              |        | (c) Explain how missing data were addressed                                                                                                                                          | Page 14                   |
|                              |        | (d) If applicable, explain how loss to follow-up was addressed                                                                                                                       | Pages 13-14 and Fig.1     |
|                              |        | (e) Describe any sensitivity analyses                                                                                                                                                | Page 14                   |



|                          |     |                                                                                                                                                                                                              |                                                    |
|--------------------------|-----|--------------------------------------------------------------------------------------------------------------------------------------------------------------------------------------------------------------|----------------------------------------------------|
| <b>Results</b>           |     |                                                                                                                                                                                                              | Page 16                                            |
| Participants             | 13* | (a) Report numbers of individuals at each stage of study—eg numbers potentially eligible, examined for eligibility, confirmed eligible, included in the study, completing follow-up, and analysed            | Page 5, Fig 1. and Fig.3                           |
|                          |     | (b) Give reasons for non-participation at each stage                                                                                                                                                         | Page 5, Fig 1. and Fig.3                           |
|                          |     | (c) Consider use of a flow diagram                                                                                                                                                                           | Fig 1.                                             |
| Descriptive data         | 14* | (a) Give characteristics of study participants (eg demographic, clinical, social) and information on exposures and potential confounders                                                                     | Page 5 and table 3                                 |
|                          |     | (b) Indicate number of participants with missing data for each variable of interest                                                                                                                          | Page 14                                            |
|                          |     | (c) Summarise follow-up time (eg, average and total amount)                                                                                                                                                  | Supplementary Table 1.                             |
| Outcome data             | 15* | Report numbers of outcome events or summary measures over time                                                                                                                                               | Page 16-17, Fig. 2-3 and Supplementary Table 1.    |
| Main results             | 16  | (a) Give unadjusted estimates and, if applicable, confounder-adjusted estimates and their precision (eg, 95% confidence interval). Make clear which confounders were adjusted for and why they were included | Page 16-17, Table 4-5 and Supplementary Table 3-4. |
|                          |     | (b) Report category boundaries when continuous variables were categorized                                                                                                                                    | Tables 1 and 2                                     |
|                          |     | (c) If relevant, consider translating estimates of relative risk into absolute risk for a meaningful time period                                                                                             |                                                    |
| Other analyses           | 17  | Report other analyses done—eg analyses of subgroups and interactions, and sensitivity analyses                                                                                                               | Page 16-21, Supplementary Table 2-4.               |
| <b>Discussion</b>        |     |                                                                                                                                                                                                              |                                                    |
| Key results              | 18  | Summarise key results with reference to study objectives                                                                                                                                                     | Page 21                                            |
| <b>Limitations</b>       |     |                                                                                                                                                                                                              |                                                    |
| Interpretation           | 20  | Give a cautious overall interpretation of results considering objectives, limitations, multiplicity of analyses, results from similar studies, and other relevant evidence                                   | Pages 21-24                                        |
| Generalisability         | 21  | Discuss the generalisability (external validity) of the study results                                                                                                                                        | Page 21-22                                         |
| <b>Other information</b> |     |                                                                                                                                                                                                              |                                                    |

|         |    |                                                                                                                                                               |         |
|---------|----|---------------------------------------------------------------------------------------------------------------------------------------------------------------|---------|
| Funding | 22 | Give the source of funding and the role of the funders for the present study and, if applicable, for the original study on which the present article is based | Page 25 |
|---------|----|---------------------------------------------------------------------------------------------------------------------------------------------------------------|---------|

\*Give information separately for cases and controls in case-control studies and, if applicable, for exposed and unexposed groups in cohort and cross-sectional studies.

**Note:** An Explanation and Elaboration article discusses each checklist item and gives methodological background and published examples of transparent reporting. The STROBE checklist is best used in conjunction with this article (freely available on the Web sites of PLoS Medicine at <http://www.plosmedicine.org/>, Annals of Internal Medicine at <http://www.annals.org/>, and Epidemiology at <http://www.epidem.com/>). Information on the STROBE Initiative is available at [www.strobe-statement.org](http://www.strobe-statement.org).

For peer review only
