# Supplementary material for: A longitudinal observational study of back pain incidence, risk factors and occupational physical activity in Swedish marine trainees
Source: PubMed Central journal article supplement — BMJ Open. 2019 May 14;9(5):e025150. doi: 10.1136/bmjopen-2018-025150 (PMC6530317; doi:10.1136/bmjopen-2018-025150), 2019-05-14
Supplement: bmjopen-2018-025150supp001.pdf [file bmjopen-2018-025150supp001.pdf]

# A longitudinal observational study of back pain incidence, risk factors, and occupational physical activity in Swedish marine trainees

## Supplementary Files

**Supplementary Table 1.** Incidence rate (IR) based on time to first LBP, and LBP limiting work-ability, episode during the marine training course.

|                      | LBP              |      |          | LBP limiting work ability |     |         |
|----------------------|------------------|------|----------|---------------------------|-----|---------|
|                      | Time at risk     | IR   | 95%CI    | Time at risk              | IR  | 95%CI   |
| Per 100 person-weeks | 398 person weeks | 9.0  | 6.5-12.5 | 539 person weeks          | 3.9 | 2.5-6.0 |
| Per 1000 person-days | 2786 person days | 12.9 | 9.3-17.9 | 3773 person days          | 5.6 | 3.6-8.5 |

**Supplementary Table 2.** Regression analyses of individual physical characteristics, work- and health-related risk variables: initial multiple hazard ratio (HR) for low back pain (LBP) and LBP limiting work ability during the marine training course.

| Variable                                               | LBP     |        |               |       | LBP limiting work ability |        |               |       |
|--------------------------------------------------------|---------|--------|---------------|-------|---------------------------|--------|---------------|-------|
|                                                        | Initial |        | Multivariable |       | Initial                   |        | Multivariable |       |
|                                                        | HR      | 95% CI | P value       |       | HR                        | 95% CI | P value       |       |
| <b>Physical characteristics</b>                        |         |        |               |       |                           |        |               |       |
| Body Height $\leq 1.80$ (m)                            | 1.69    | 1.02   | 2.79          | 0.040 | 2.90                      | 1.31   | 6.43          | 0.009 |
| <b>Rated health/health history</b>                     |         |        |               |       |                           |        |               |       |
| Back Pain; within 6 mo. prior to course start          | 1.61    | 0.85   | 3.05          | 0.145 | 2.42                      | 0.89   | 6.55          | 0.082 |
| Hip/Knee Pain; within 6 mo. prior to course start      | 1.30    | 0.75   | 2.27          | 0.350 |                           |        |               |       |
| Neck/Shoulder Pain; within 6 mo. prior to course start | 1.25    | 0.68   | 2.35          | 0.483 | 2.35                      | 0.76   | 7.21          | 0.136 |
| <b>Work-related</b>                                    |         |        |               |       |                           |        |               |       |
| Current Work ability with regard to best ever          | 1.48    | 0.86   | 2.54          | 0.152 |                           |        |               |       |
| <b>Physical training habits past 6months</b>           |         |        |               |       |                           |        |               |       |
| Physical training;<br>$\leq 2$ sessions/week           |         |        |               |       | 3.16                      | 1.23   | 8.13          | 0.017 |
| Muscular strength training;<br>$\leq 1$ sessions/week  |         |        |               |       | 0.44                      | 0.12   | 1.61          | 0.215 |
| 2-4 sessions/week                                      |         |        |               |       |                           |        |               |       |
| $\geq 5$ sessions/week                                 |         |        |               |       | 1.27                      | 0.45   | 3.54          | 0.649 |

**Supplementary Table 3.** Regression analyses of clinical tests: univariate and multiple final adjusted<sup>†</sup> hazard ratio (HR) for low back pain during the marine training course.

|                                                   | Univariate |        |         | Final Adjusted Model <sup>a</sup> |        |         |            |
|---------------------------------------------------|------------|--------|---------|-----------------------------------|--------|---------|------------|
|                                                   | HR         | 95% CI | P value | HR                                | 95% CI | P value |            |
| <b>Physical/clinical tests</b>                    |            |        |         |                                   |        |         |            |
| Kettlebell lifts; kg*rep<br>≤760 (lowest tertile) | 1.48       | 0.82   | 2.67    | 0.198                             |        |         |            |
| <b>Sensitivity analysis</b>                       |            |        |         |                                   |        |         |            |
| CC (i.e. only male)                               | 1.44       | 0.76   | 2.7     | 0.261                             |        |         |            |
| Imputed (only male)                               | 1.48       | 0.75   | 2.91    | 0.256                             |        |         |            |
| Pull-ups<br>≤ 3                                   | 1.99       | 1.11   | 3.56    | 0.020                             | 1.87   | 1.17    | 3.01 0.009 |
| <b>Sensitivity analysis</b>                       |            |        |         |                                   |        |         |            |
| CC (i.e. only male)                               | 2.00       | 1.10   | 3.66    | 0.025                             | 1.82   | 1.16    | 2.88 0.009 |
| Imputed (only male)                               | 1.94       | 1.06   | 3.54    | 0.032                             | 1.81   | 1.13    | 2.91 0.014 |
| <b>MCM-Tests,<br/>direction specific;</b>         |            |        |         |                                   |        |         |            |
| DLL-L Flex; <i>Fail</i>                           | 0.82       | 0.39   | 1.75    | 0.613                             |        |         |            |
| DLL-L Ext; <i>Fail</i>                            | 0.82       | 0.47   | 1.46    | 0.508                             |        |         |            |
| DLL-ALE Flex; <i>Fail</i>                         | 0.71       | 0.32   | 1.56    | 0.388                             |        |         |            |
| DLL-ALE Ext; <i>Fail</i>                          | 1.35       | 0.76   | 2.40    | 0.310                             |        |         |            |

<sup>a</sup>Adjusted for prior back pain and body height

Abbreviations; CC; complete cases, DLL-L Flex; Double leg lift-lower lumbar flexion-control, DLL-L Ext; Double leg lift-lower lumbar extension-control, DLL-ALE Flex; Double leg lift-alternate leg extension lumbar flexion-control, DLL-L Ext; Double leg lift-alternate leg extension lumbar extension-control.

**Supplementary Table 4.** Regression analyses of clinical tests: univariate hazard ratio (HR) for low back pain limiting work ability during the marine training course.

|                                                   | HR   | 95% CI |      | P value |
|---------------------------------------------------|------|--------|------|---------|
| <b>Physical/clinical tests</b>                    |      |        |      |         |
| Kettlebell lifts; kg*rep<br>≤760 (lowest tertile) | 1.02 | 0.67   | 1.54 | 0.923   |
| <b>Sensitivity analysis</b>                       |      |        |      |         |
| Complete cases (i.e. only male)                   | 1.10 | 0.31   | 3.92 | 0.884   |
| Imputed (only male)                               | 1.12 | 0.37   | 3.39 | 0.834   |
| Pull-ups<br>≤ 3                                   | 1.02 | 0.75   | 1.38 | 0.912   |
| <b>Sensitivity analysis</b>                       |      |        |      |         |
| Complete cases (i.e. only male)                   | 1.23 | 0.42   | 3.64 | 0.709   |
| Imputed (only male)                               | 1.29 | 0.46   | 3.60 | 0.631   |
| <b>MCM-Tests, direction specific;</b>             |      |        |      |         |
| DLL-L Flex; <i>Fail</i>                           | 0.71 | 0.21   | 2.43 | 0.587   |
| DLL-L Ext; <i>Fail</i>                            | 0.85 | 0.35   | 2.06 | 0.715   |
| DLL-ALE Flex; <i>Fail</i>                         | 0.76 | 0.23   | 2.54 | 0.650   |
| DLL-ALE Ext; <i>Fail</i>                          | 0.71 | 0.29   | 1.73 | 0.452   |

Abbreviations; DLL-L Flex; Double leg lift-lower lumbar flexion-control, DLL-L Ext; Double leg lift-lower lumbar extension-control, DLL-ALE Flex; Double leg lift-alternate leg extension lumbar flexion-control, DLL-L Ext; Double leg lift-alternate leg extension lumbar extension-control.
